# Supplementary material
Source: Research Square preprint supplement (doi:10.21203/rs.3.rs-9289778/v1)
Supplement: Supplementary file 1 [file 3aa2eff67a527cda67e8598a.pdf]

## Supplementary information

### **A Neutral $\sigma^0\pi^2$ Carbene Enabling Hydrogen Activation via a $\sigma$ -Face Pathway**

Fei Fan, Haoxiang Nong, Miaomiao Zhou, Liu Leo Liu\*

Department of Chemistry and Research Center for Chemical Biology and Omics Analysis,  
College of Science, Southern University of Science and Technology, Shenzhen 518055, China

## Table of Contents

|                                                                                                          |     |
|----------------------------------------------------------------------------------------------------------|-----|
| <b>I. Materials and Methods</b> .....                                                                    | S3  |
| <b>II. Experimental Details and Characterization Data</b> .....                                          | S4  |
| <b>III. NMR Spectra</b> .....                                                                            | S8  |
| <b>IV. HRMS Spectra</b> .....                                                                            | S18 |
| <b>V. X-ray Crystallographic Data</b> .....                                                              | S20 |
| <b>VI. Photophysical Data</b> .....                                                                      | S23 |
| <b>VII. Kinetic Experiments</b> .....                                                                    | S25 |
| 7.1 Time-course kinetics for D <sub>2</sub> . .....                                                      | S25 |
| 7.2 KIE determination from the initial-rate regime.....                                                  | S27 |
| <b>VIII. Computational Details</b> .....                                                                 | S29 |
| 8.1 Geometry optimization and singlet–triplet energy gap of <b>2</b> . .....                             | S30 |
| 8.2 TDDFT calculations of <b>2</b> .....                                                                 | S31 |
| 8.3 NMR calculations .....                                                                               | S32 |
| 8.4 Regarding the observed asynchronicity .....                                                          | S36 |
| 8.5 IBO calculations for <b>2</b> . .....                                                                | S39 |
| 8.6 FMOs calculations for cationic $\sigma^0\pi^2$ carbene <b>A</b> .....                                | S40 |
| 8.7 Gibbs free energy profiles for H <sub>2</sub> activation by <b>2</b> and <b>CAAC</b> (kcal/mol)..... | S41 |
| 8.8 Heavy-atom root-mean-square deviation (RMSD) of <b>2</b> and <b>CAAC</b> .....                       | S42 |
| 8.9 Activation strain model (ASM) analysis of <b>2</b> and <b>CAAC</b> .....                             | S43 |
| 8.10 NLMOs of <b>TS1</b> and <b>TS2</b> .....                                                            | S44 |
| 8.11 2D deformation density and ELF maps.....                                                            | S45 |
| <b>IX. References</b> .....                                                                              | S65 |

## I. Materials and Methods

All manipulations were conducted within a nitrogen-filled glovebox or under a dry nitrogen atmosphere, employing standard Schlenk techniques, unless otherwise specified. *n*-hexane, *n*-pentane, and tetrahydrofuran (THF) and dichloromethane (DCM) were subjected to distillation over sodium/potassium, LiAlH<sub>4</sub> or CaH<sub>2</sub> and subsequently stored over activated molecular sieves in the glove box. Commercial reagents were purchased from Energy Chemical, J&K, or TCI Chemical Co. and used as received.  $\alpha$ -(bisphosphino)diazomethane **1(I)** and Rh(cod)(allyl) (cod = 1,5-cyclooctadiene)(**2**) were prepared according to the procedure described in the literature. Mes represents mesityl (mesityl = 1,3,5-Me<sub>3</sub>C<sub>6</sub>H<sub>2</sub>). Deuterated solvents, such as C<sub>6</sub>D<sub>6</sub> and THF-*d*<sub>8</sub>, were degassed by employing three freeze–pump–thaw cycles and stored over activated molecular sieves in the glovebox. NMR spectra were acquired at 298 K on a Bruker Avance 400 (<sup>1</sup>H: 400 MHz, <sup>31</sup>P: 162 MHz, <sup>13</sup>C: 101 MHz) or 600 (<sup>1</sup>H: 600 MHz, <sup>31</sup>P: 243 MHz, <sup>13</sup>C: 151 MHz) NMR spectrometer. The provided data is presented as follows: chemical shift, multiplicity (s = singlet, d = doublet, t = triplet, q = quartet, dt = doublet of triplets, td = triplet of doublets, br = broad, m = multiplet and/or multiple resonances), coupling constant in hertz (Hz), integration and attribution.

High-resolution mass spectrometry (HRMS) was conducted using a Thermo Fisher Scientific Q-Exactive MS System with electrospray ionization (ESI) method. Infrared spectra were recorded on a FT-IR spectrometer (Bruker ALPHA II) using a DLaTGS detector. UV-Vis absorption spectra were recorded on Lambda 365 spectrophotometer (PerkinElmer) at room temperature.

Crystal data were collected on a Bruker D8 VENTURE diffractometer equipped with either an Excillum METALJET microfocus X-ray source (Ga-K $\alpha$ ,  $\lambda$  = 1.34139 Å) or a Mo-K $\alpha$  radiation source ( $\lambda$  = 0.71073 Å). Data reduction, scaling and absorption corrections were performed using SAINT (Bruker, V8.38A, 2013). The structures were solved with the XT structure solution program using the Intrinsic Phasing solution method and by using Olex2 as the graphical interface. The frames were integrated with the Bruker SAINT software package using a narrow-frame algorithm. Data was corrected for absorption effects using the empirical multi-scan method (SADABS). The model was refined with the ShelXL program using Least Squares minimization. All non-hydrogen atoms were refined anisotropically. Hydrogen atoms were included in structure factor calculations. All hydrogen atoms were assigned to idealized geometric positions.

To gain deeper insight into the electronic structure, we carried out an experimental charge density analysis based on the X-ray diffraction data using the *MoPro* program. Unlike to the conventional spherical atomic structural parameters refined in routine X-ray diffraction analyses, this approach characterizes the aspherical nature of atomic electron density by introducing the Hansen-Coppens multipolar formalism for individual atoms. Multipolar coefficients were refined up to the dipolar level for hydrogen atoms, the octopolar level for carbon and nitrogen atoms, and the hexadecapolar level for rhodium and phosphorus atoms. The scaling factor was refined sequentially, along with full automatic electron density refinement under specific constraints: multipole symmetry, identical valence and multipole populations for equivalent atoms, and uniform contraction/expansion coefficients ( $\kappa$  values) for equivalent atoms. Finally, the 2D deformation electron density was calculated and visualized using *MoProViewer*.

## II. Experimental Details and Characterization Data

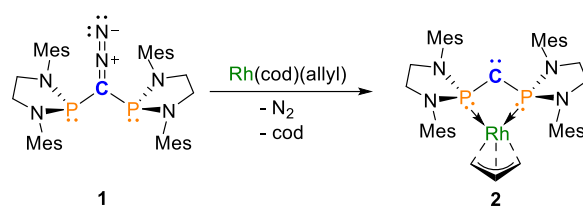

**Fig. S1.** Synthesis of **2**.

A solution of Rh(cod)(allyl) (17.6 mg, 0.07 mmol) in DCM (1.0 mL) was slowly added to a DCM solution of compound **1** (50.0 mg, 0.07 mmol) (2.0 mL) at -30 °C. After stirring for 0.5 hour, all volatile were evaporated under vacuum, the resulting brown solid was extracted with *n*-hexane (6 mL). Concentration of the *n*-hexane solution yielded compound **2** as an orange-yellow solid (49 mg, 0.05 mmol) in 85% yield. Single crystals (orange-yellow) suitable for X-ray diffraction analysis were obtained through the slow evaporation of a concentrated benzene solution at room temperature. <sup>1</sup>H NMR (600 MHz, THF-*d*<sub>8</sub>) δ (ppm) 6.51 (d, *J* = 6.0 Hz, 8H, <sup>Mes</sup>Ar-*H*), 4.36–4.28 (m, 1H, <sup>allyl</sup>CH), 3.50–3.47 (m, 6H, CH<sub>2</sub> and <sup>allyl</sup>CH<sub>2</sub>), 3.42–3.38 (m, 4H, CH<sub>2</sub>), 2.21 (s, 12 H, <sup>Mes</sup>CH<sub>3</sub>), 2.15 (s, 12 H, <sup>Mes</sup>CH<sub>3</sub>), 2.07 (s, 12 H, <sup>Mes</sup>CH<sub>3</sub>), 1.86–1.83 (m, 2H, <sup>allyl</sup>CH<sub>2</sub>).

<sup>13</sup>C{<sup>1</sup>H} NMR (151 MHz, THF-*d*<sub>8</sub>) δ (ppm) 139.6, 138.9, 137.5 (d, *J* = 3.0 Hz), 137.48 (d, *J* = 3.0 Hz), 135.7, 129.8, 129.2, 100.0–99.9 (m, <sup>allyl</sup>CH), 50.2–50.0 (m, <sup>allyl</sup>CH<sub>2</sub>), 48.0 (d, *J* = 4.5 Hz, CH<sub>2</sub>), 47.98 (d, *J* = 4.5 Hz, CH<sub>2</sub>), 21.5, 19.4, 19.3, -22.7 (d, <sup>2</sup>*J*<sub>Rh-C</sub> = 10.6 Hz, PCP).

<sup>31</sup>P NMR (243 MHz, THF-*d*<sub>8</sub>) δ (ppm) 88.3 (d, <sup>1</sup>*J*<sub>Rh-P</sub> = 194.4 Hz).

HRMS [M+H]<sup>+</sup> C<sub>44</sub>H<sub>58</sub>N<sub>4</sub>P<sub>2</sub>Rh<sup>+</sup> calc. 807.3186 *m/z*, found 807.3183 *m/z*.

IR (ATR, neat): ν = 3059, 2908, 2846, 1608, 1479, 1247, 930 cm<sup>-1</sup>

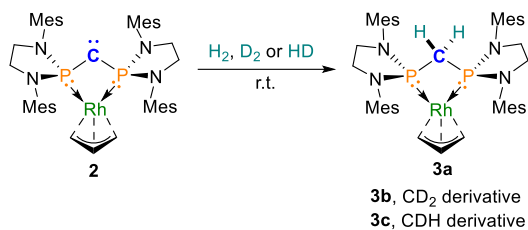

**Fig. S2.** Synthesis of **3a**, **3b** and **3c**.

A solution of **2** (50.0 mg, 0.06 mmol) in benzene (2.0 mL) was degassed by freeze-pump-thaw cycles 3~5 times, and exposed to 1 atm of H<sub>2</sub> at 10 °C. The solution was then gradually warmed to room temperature and stirred for another 24 hours, resulting in a color change to brown. All volatiles were removed under vacuum, affording a deep brown solid. The mixture was subsequently extracted with *n*-hexane (3 x 2 mL) and filtered through a pad of celite. Slow evaporation of the concentrated *n*-hexane solution at room temperature afforded orange-yellow crystals **3a**. Yield: 32 mg (0.04 mmol, 67%). Single crystals (orange-yellow) suitable for X-ray diffraction analysis were obtained through the slow evaporation of a concentrated *n*-hexane solution at room temperature.

<sup>1</sup>H NMR (400 MHz, THF-*d*<sub>8</sub>) δ (ppm) 6.69 (br, 2H, <sup>Mes</sup>Ar-*H*), 6.66–6.63 (m, 6H, <sup>Mes</sup>Ar-*H*), 4.18 (td, *J* = 8.8 Hz, 1H, PCH<sub>2</sub>P), 3.98–3.87 (m, 2H, <sup>allyl</sup>CH and PCH<sub>2</sub>P), 3.43–3.34 (m, 4H, CH<sub>2</sub>), 3.32–3.26 (m, 4H, CH<sub>2</sub>), 3.11 (dd, *J* = 7.2, 3.2 Hz, 2H, <sup>allyl</sup>CH<sub>2</sub>), 2.39 (s, 6H, <sup>Mes</sup>CH<sub>3</sub>), 2.37 (s, 6H, <sup>Mes</sup>CH<sub>3</sub>), 2.26 (s, 6H, <sup>Mes</sup>CH<sub>3</sub>), 2.23 (s, 6H, <sup>Mes</sup>CH<sub>3</sub>), 1.98 (s, 6H, <sup>Mes</sup>CH<sub>3</sub>), 1.89 (s, 6H, <sup>Mes</sup>CH<sub>3</sub>), 1.23 (dd, *J* = 13.6, 8.0 Hz, 2H, <sup>allyl</sup>CH<sub>2</sub>).

<sup>13</sup>C{<sup>1</sup>H} NMR (151 MHz, THF-*d*<sub>8</sub>) δ (ppm) 140.9 (d, *J* = 9.1 Hz), 140.88, 140.42 (d, *J* = 9.1 Hz), 140.4, 139.6, 139.4, 139.0, 138.6, 135.6, 135.4, 130.1, 130.0, 129.9, 129.6, 114.5 (br, <sup>allyl</sup>CH), 81.6 (d, <sup>2</sup>*J*<sub>Rh-C</sub> = 15.1 Hz, PCH<sub>2</sub>P), 55.8 (dd, <sup>1</sup>*J*<sub>Rh-C</sub> = 34.7, <sup>2</sup>*J*<sub>P-C</sub> = 6.0 Hz, <sup>allyl</sup>CH<sub>2</sub>), 51.3, 51.1, 21.66 (d, *J* = 3.0 Hz), 21.64 (d, *J* = 3.0 Hz), 21.4, 21.3, 21.2, 19.6, 19.5.

<sup>31</sup>P NMR (162 MHz, THF-*d*<sub>8</sub>) δ (ppm) 71.0 (d, <sup>1</sup>*J*<sub>Rh-P</sub> = 251.1 Hz).

HRMS [M-allyl]<sup>+</sup> C<sub>41</sub>H<sub>54</sub>N<sub>4</sub>P<sub>2</sub>Rh<sup>+</sup> calc. 767.2873 *m/z*, found 767.2868 *m/z*.

A solution of **2** (40.0 mg, 0.05 mmol) in benzene (2.5 mL) was degassed by freeze-pump-thaw cycles 3~5 times, and exposed to 1 atm of D<sub>2</sub> at 10 °C. The solution was then gradually warmed to room temperature and stirred for another 24 hours, resulting in a color change to brown. All volatiles were removed under vacuum, affording a deep brown solid. The mixture was subsequently extracted with *n*-hexane (3 x 2 mL) and filtered through a pad of celite. Slow evaporation of the concentrated *n*-hexane solution at room temperature afforded orange-yellow crystals **3b**. Yield: 24 mg (0.03 mmol, 60%).

<sup>1</sup>H NMR (400 MHz, THF-*d*<sub>8</sub>) δ (ppm) 6.69 (br, 2H, <sup>Mes</sup>Ar-*H*), 6.66–6.63 (m, 6H, <sup>Mes</sup>Ar-*H*), 3.98–3.87 (m, 1H, <sup>allyl</sup>CH), 3.43–3.36 (m, 4H, CH<sub>2</sub>), 3.35–3.24 (m, 4H, CH<sub>2</sub>), 3.11 (dd, *J* = 7.2, 3.2 Hz, 2H, <sup>allyl</sup>CH<sub>2</sub>), 2.39 (s, 6H, <sup>Mes</sup>CH<sub>3</sub>), 2.37 (s, 6H, <sup>Mes</sup>CH<sub>3</sub>), 2.26 (s, 6H, <sup>Mes</sup>CH<sub>3</sub>), 2.23 (s, 6H, <sup>Mes</sup>CH<sub>3</sub>), 1.98 (s, 6H, <sup>Mes</sup>CH<sub>3</sub>), 1.89 (s, 6H, <sup>Mes</sup>CH<sub>3</sub>), 1.23 (dd, *J* = 16.0, 8.0 Hz, 2H, <sup>allyl</sup>CH<sub>2</sub>).

<sup>13</sup>C{<sup>1</sup>H} NMR (151 MHz, THF-*d*<sub>8</sub>) δ (ppm) 140.9 (d, *J* = 9.1 Hz), 140.89, 140.44 (d, *J* = 7.6 Hz), 140.3, 139.6, 139.4, 139.0, 138.6, 135.6, 135.4, 130.1, 130.0, 129.9, 129.6, 114.5 (br, <sup>allyl</sup>CH), 81.7–81.0 (m, PCD<sub>2</sub>P), 55.8 (dd, <sup>1</sup>*J*<sub>Rh-C</sub> = 34.7, <sup>2</sup>*J*<sub>P-C</sub> = 6.0 Hz, <sup>allyl</sup>CH<sub>2</sub>), 51.3, 51.1, 21.65 (d, *J* = 3.0 Hz), 21.63 (d, *J* = 3.0 Hz), 21.4, 21.3, 21.1, 19.6, 19.5.

<sup>2</sup>H NMR (92 MHz, THF-*d*<sub>8</sub>) δ (ppm) 4.14 (br, 1D, PCD<sub>2</sub>P), 3.90 (br, 1D, PCD<sub>2</sub>P).

<sup>31</sup>P NMR (162 MHz, THF-*d*<sub>8</sub>) δ (ppm) 68.7 (d, <sup>1</sup>*J*<sub>Rh-P</sub> = 247.9 Hz).

HRMS [M-allyl]<sup>+</sup> C<sub>41</sub>H<sub>52</sub>D<sub>2</sub>N<sub>4</sub>P<sub>2</sub>Rh<sup>+</sup> calc. 769.2999 *m/z*, found 769.2974 *m/z*.

A solution of **2** (40.0 mg, 0.05 mmol) in benzene (2.5 mL) was degassed by freeze-pump-thaw cycles 3~5 times, and exposed to 1 atm of HD at 10 °C. The solution was then gradually warmed to room temperature and stirred for another 24 hours, resulting in a color change to brown. All volatiles were removed under vacuum, affording a deep brown solid. The mixture was subsequently extracted with *n*-hexane (3 x 2 mL) and filtered through a pad of celite. Slow evaporation of the concentrated *n*-hexane solution at room temperature afforded orange-yellow crystals **3c**. Yield: 25 mg (0.03 mmol, 62%).

<sup>1</sup>H NMR (600 MHz, THF-*d*<sub>8</sub>) δ (ppm) 6.69 (br, 2H, <sup>Mes</sup>Ar-*H*), 6.66–6.63 (m, 6H, <sup>Mes</sup>Ar-*H*), 4.20–4.15 (m, 0.47H, PCHDP), 3.96–3.89 (m, 1.53H, <sup>allyl</sup>CH and PCHDP), 3.45–3.35 (m, 4H, CH<sub>2</sub>), 3.33–3.26 (m, 4H, CH<sub>2</sub>), 3.11 (dd, *J* = 7.2, 2.4 Hz, 2H, <sup>allyl</sup>CH<sub>2</sub>), 2.39 (s, 6H, <sup>Mes</sup>CH<sub>3</sub>), 2.37 (s, 6H, <sup>Mes</sup>CH<sub>3</sub>), 2.26 (s, 6H, <sup>Mes</sup>CH<sub>3</sub>), 2.23 (s, 6H, <sup>Mes</sup>CH<sub>3</sub>), 1.98 (s, 6H, <sup>Mes</sup>CH<sub>3</sub>), 1.89 (s, 6H, <sup>Mes</sup>CH<sub>3</sub>), 1.23 (dd, *J* = 13.6, 7.8 Hz, 2H, <sup>allyl</sup>CH<sub>2</sub>).

<sup>13</sup>C{<sup>1</sup>H} NMR (151 MHz, THF-*d*<sub>8</sub>) δ (ppm) 140.9 (d, *J* = 9.1 Hz), 140.44 (d, *J* = 9.1 Hz), 140.4, 139.6, 139.4, 139.0, 138.6, 135.6, 135.4, 130.1, 130.0, 129.9, 129.6, 114.5 (br, <sup>allyl</sup>CH), 81.7–81.2 (m, PCHDP), 55.8 (dd, <sup>1</sup>*J*<sub>Rh-C</sub> = 34.7, <sup>2</sup>*J*<sub>P-C</sub> = 6.0 Hz, <sup>allyl</sup>CH<sub>2</sub>), 51.3, 51.1, 21.65 (d, *J* = 3.0 Hz), 21.63 (d, *J* = 4.5 Hz), 21.4, 21.3, 21.1, 19.6, 19.5.

<sup>2</sup>H NMR (92 MHz, THF-*d*<sub>8</sub>) δ (ppm) 4.15 (br, 0.47D, PCHDP), 3.90 (br, 0.53D, PCHDP).

<sup>31</sup>P NMR (243 MHz, THF-*d*<sub>8</sub>) δ (ppm) 70.3 (d, <sup>1</sup>*J*<sub>Rh-P</sub> = 250.3 Hz).

HRMS [M-allyl]<sup>+</sup> C<sub>41</sub>H<sub>53</sub>DN<sub>4</sub>P<sub>2</sub>Rh<sup>+</sup> calc. 768.2936 *m/z*, found 768.2921 *m/z*.



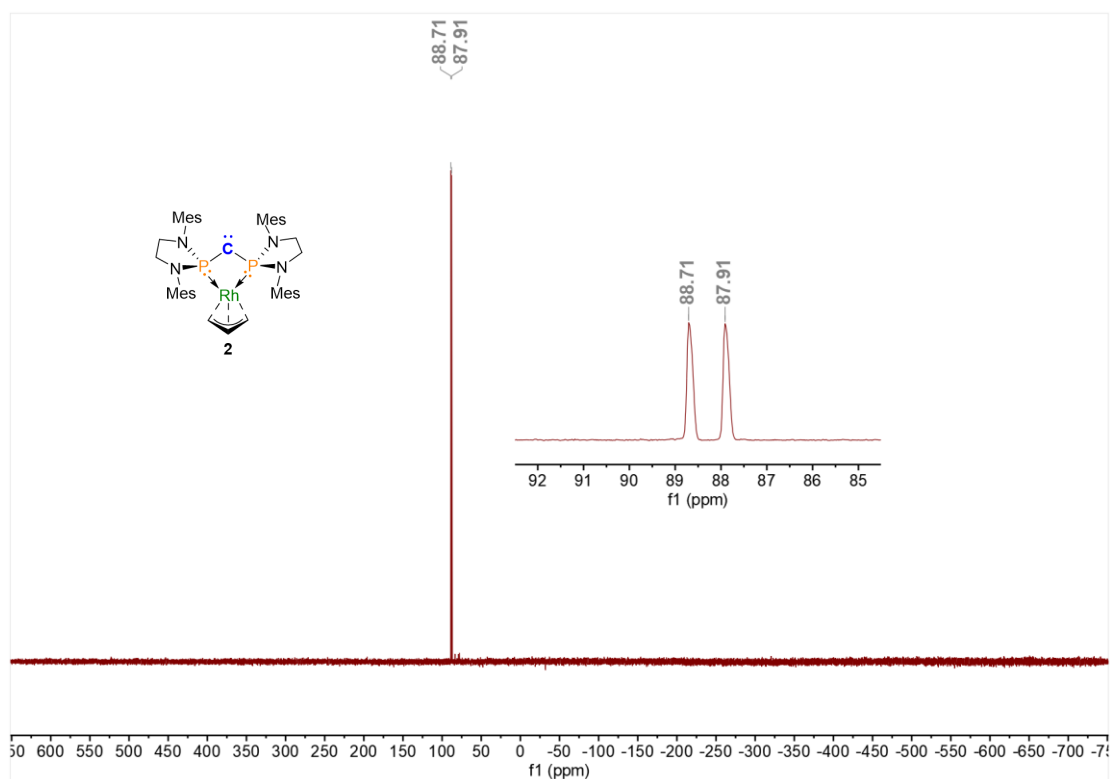

**Fig. S5.**  $^{31}\text{P}$  NMR spectrum of **2** (243 MHz, THF-*d*<sub>8</sub>).

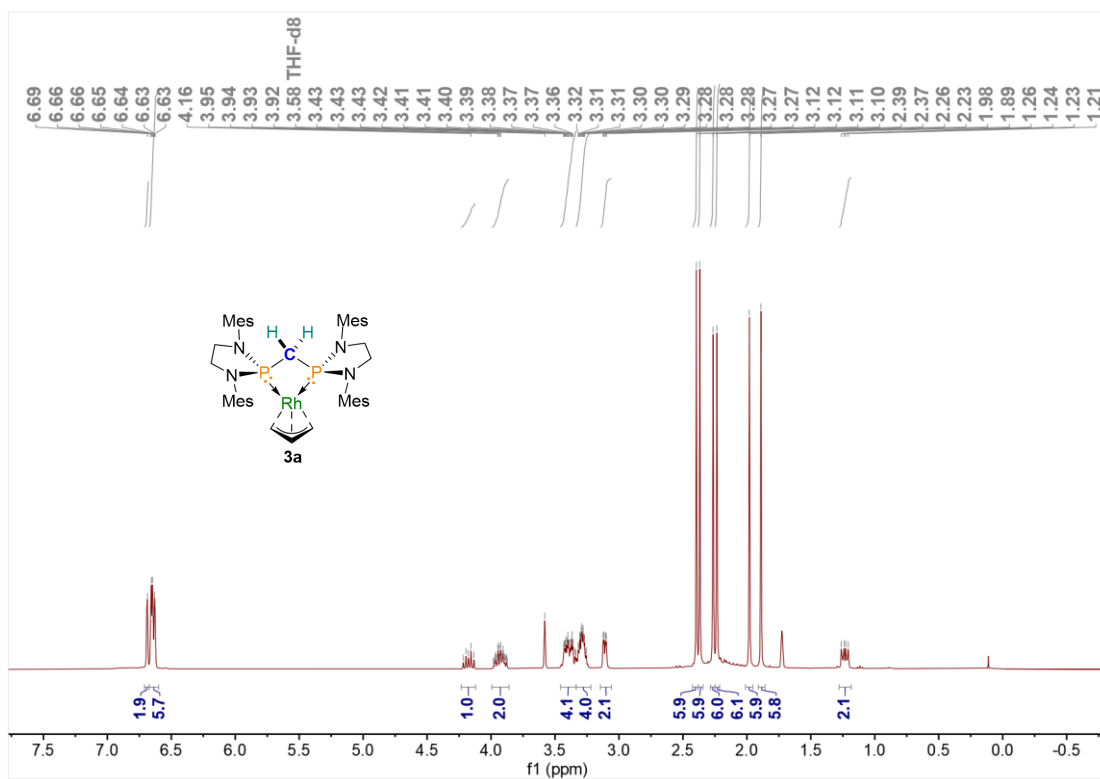

**Fig. S6.**  $^1\text{H}$  NMR spectrum of **3a** (400 MHz, THF-*d*<sub>8</sub>).

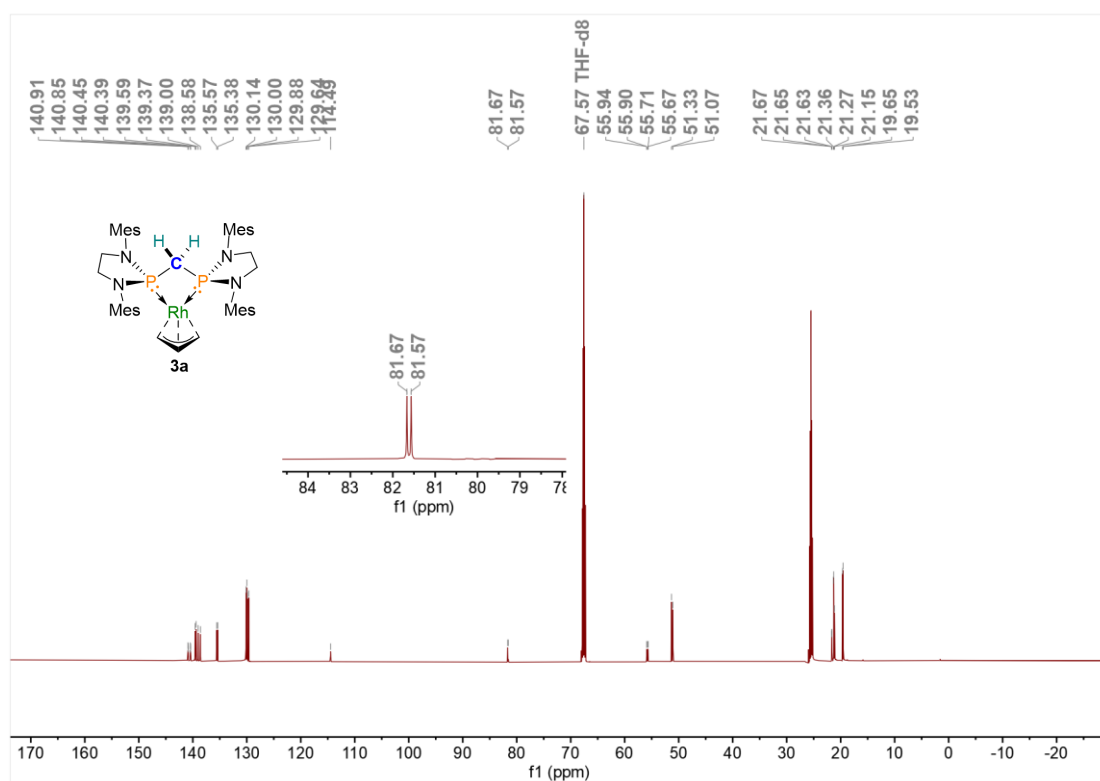

**Fig. S7.**  $^{13}\text{C}\{^1\text{H}\}$  NMR spectrum of **3a** (151 MHz, THF-*d*<sub>8</sub>).

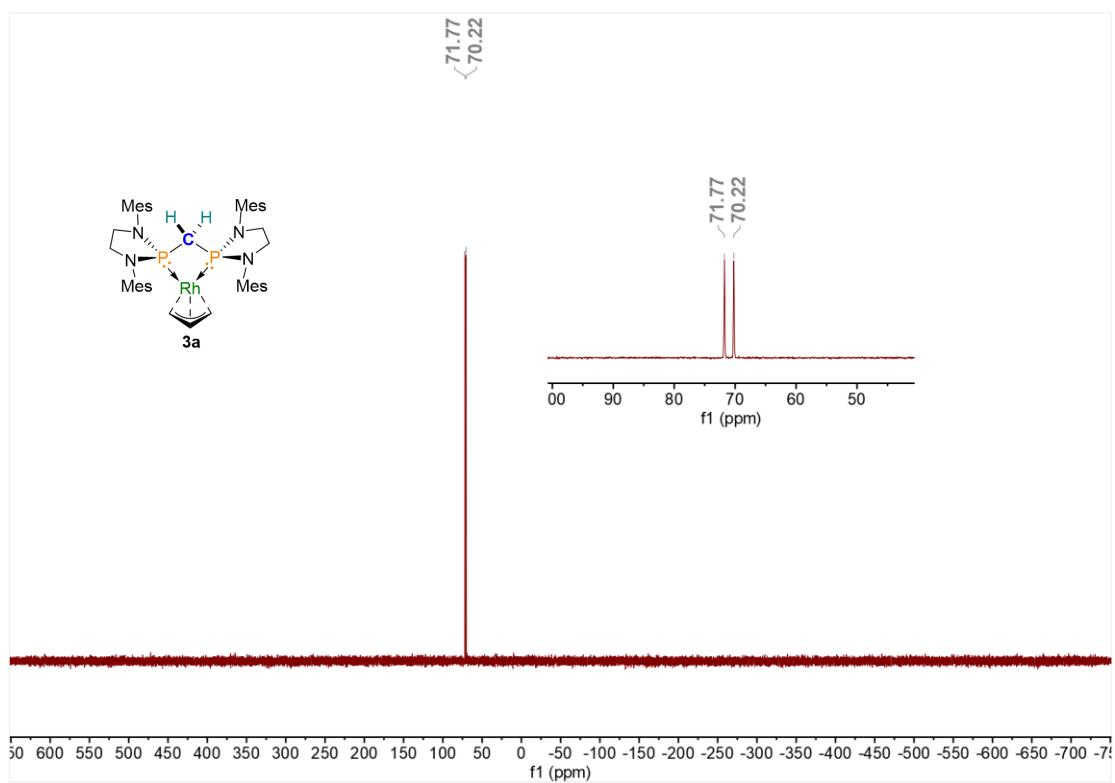

**Fig. S8.**  $^{31}\text{P}$  NMR spectrum of **3a** (162 MHz, THF-*d*<sub>8</sub>).

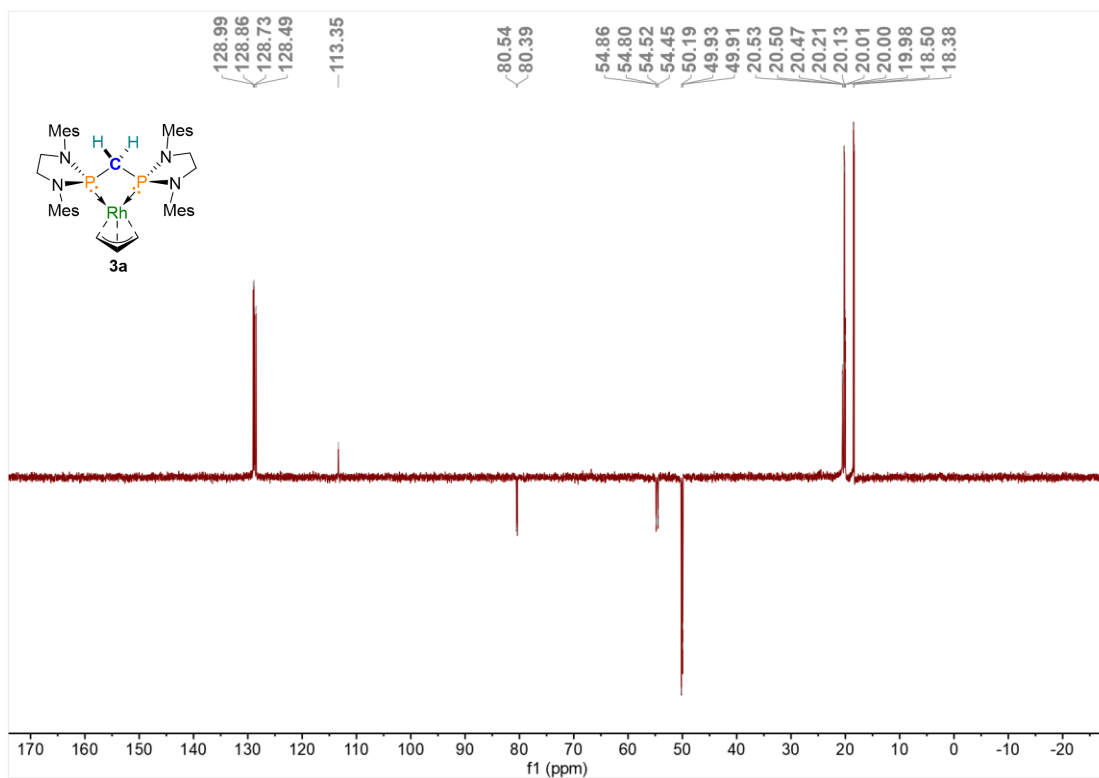

**Fig. S9.** DEPT-135  $^{13}\text{C}\{^1\text{H}\}$  NMR spectrum of **3a** (101 MHz, THF- $d_8$ ).

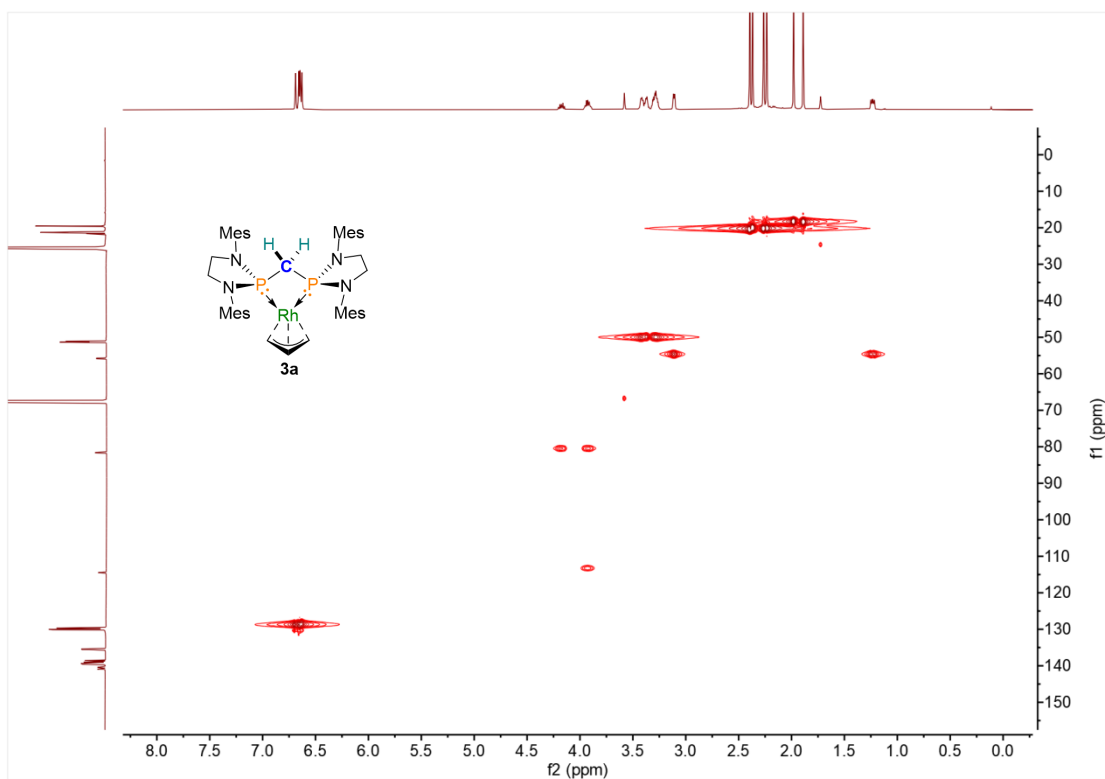

**Fig. S10.**  $^1\text{H}$ - $^{13}\text{C}$  HSQC spectrum of **3a** (600 MHz, THF- $d_8$ ).

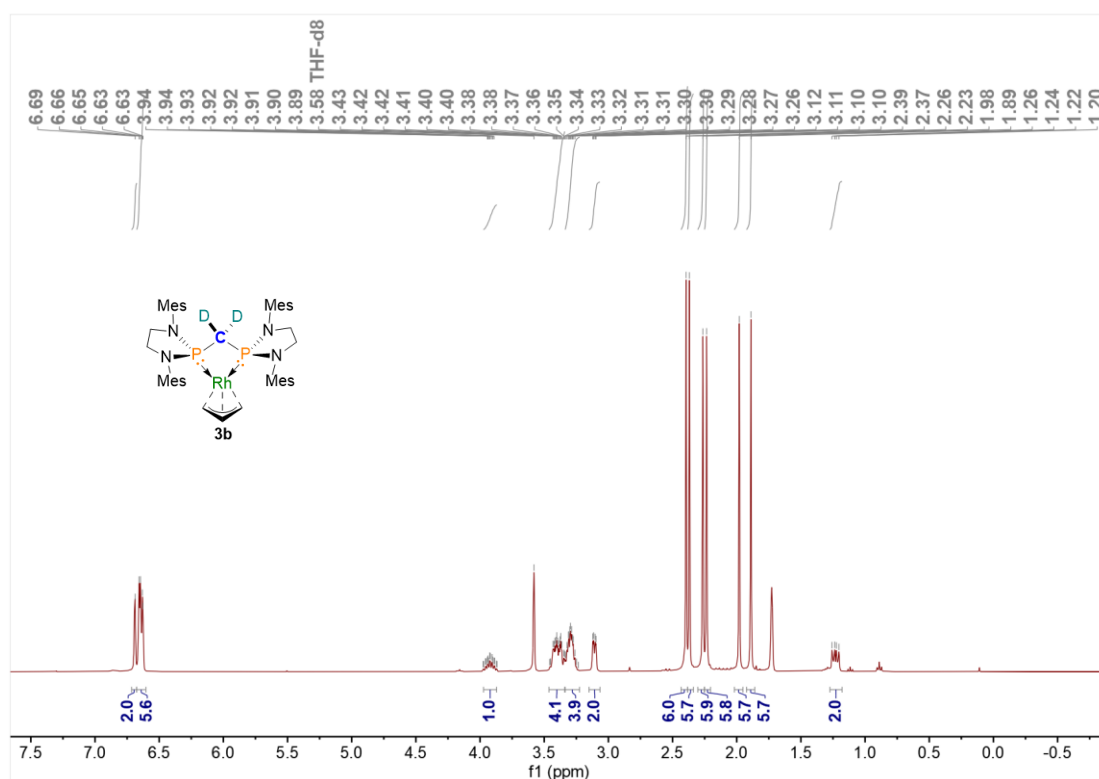

**Fig. S11.**  $^1\text{H}$  NMR spectrum of **3b** (400 MHz,  $\text{THF-}d_8$ ).

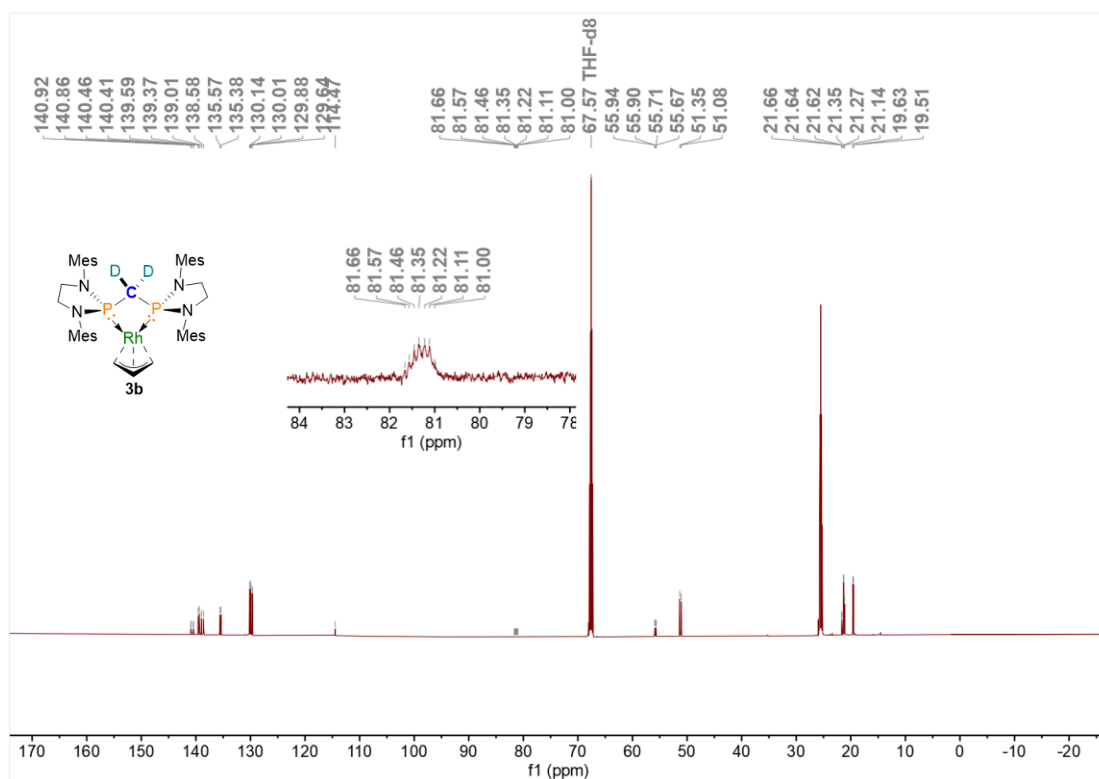

**Fig. S12.**  $^{13}\text{C}\{^1\text{H}\}$  NMR spectrum of **3b** (151 MHz,  $\text{THF-}d_8$ ).

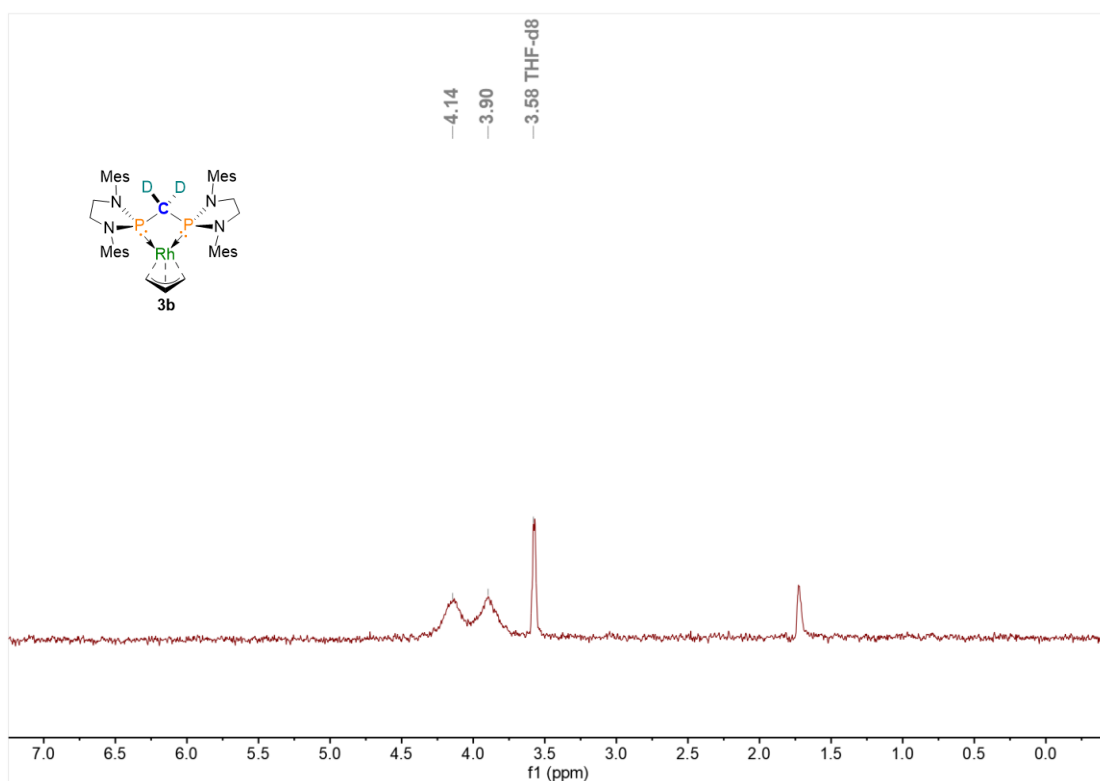

**Fig. S13.**  $^2\text{H}$  NMR spectrum of **3b** (92 MHz, THF- $d_8$ ).

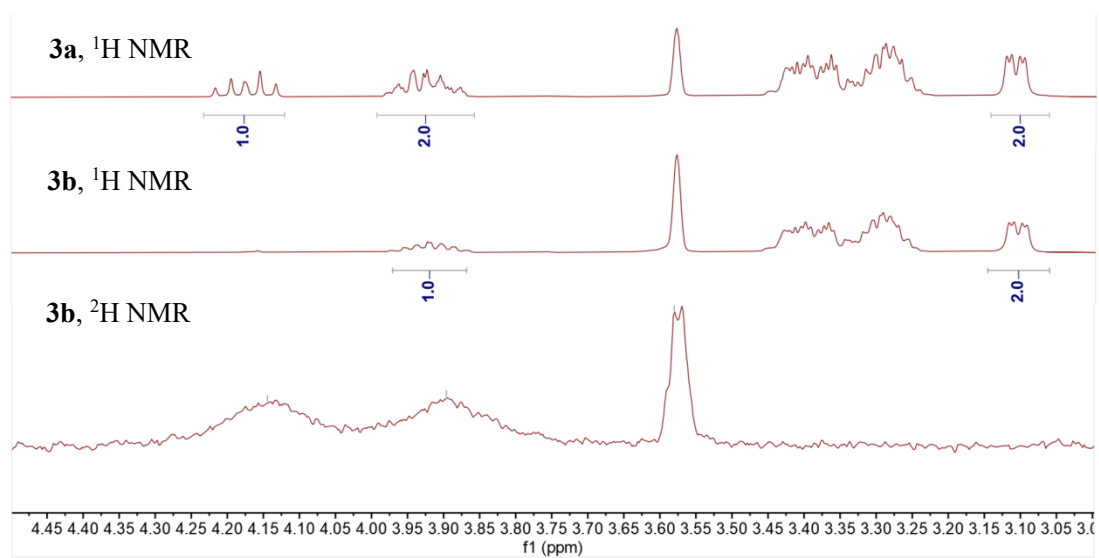

**Fig. S14.** Overlay of  $^1\text{H}$  NMR spectrum of **3a**, **3b** and  $^2\text{H}$  NMR spectrum of **3b**.

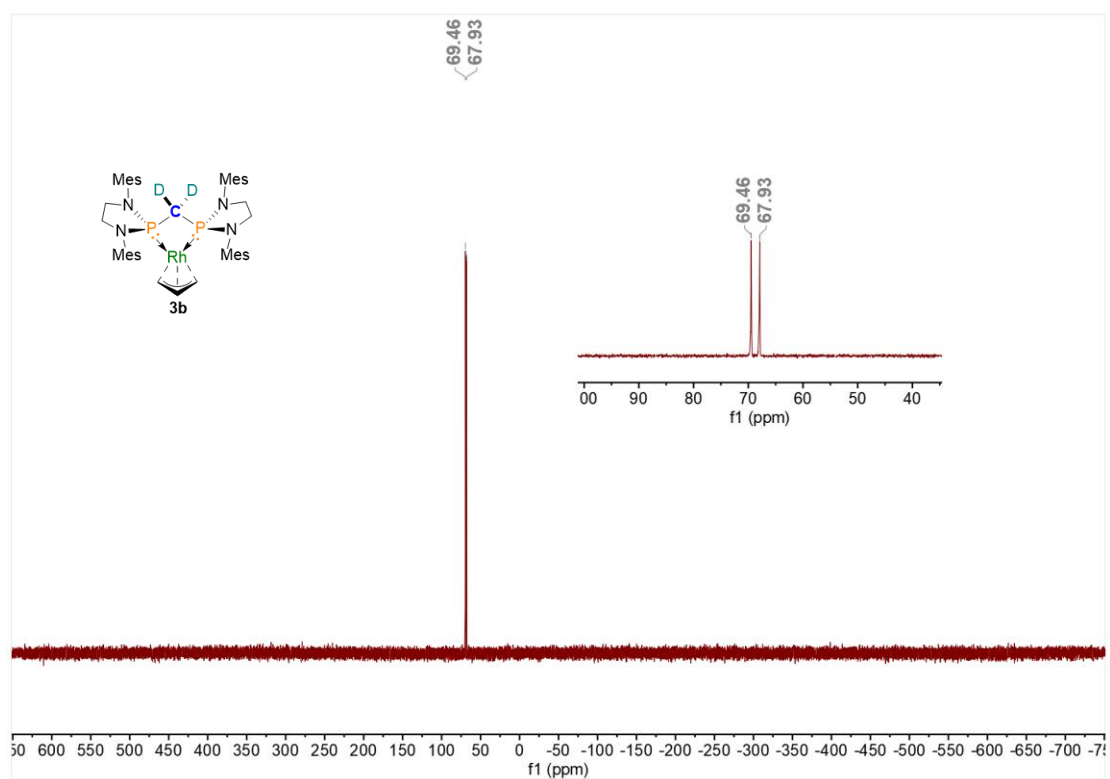

**Fig. S15.**  $^{31}\text{P}$  NMR spectrum of **3b** (162 MHz,  $\text{THF-}d_8$ ).

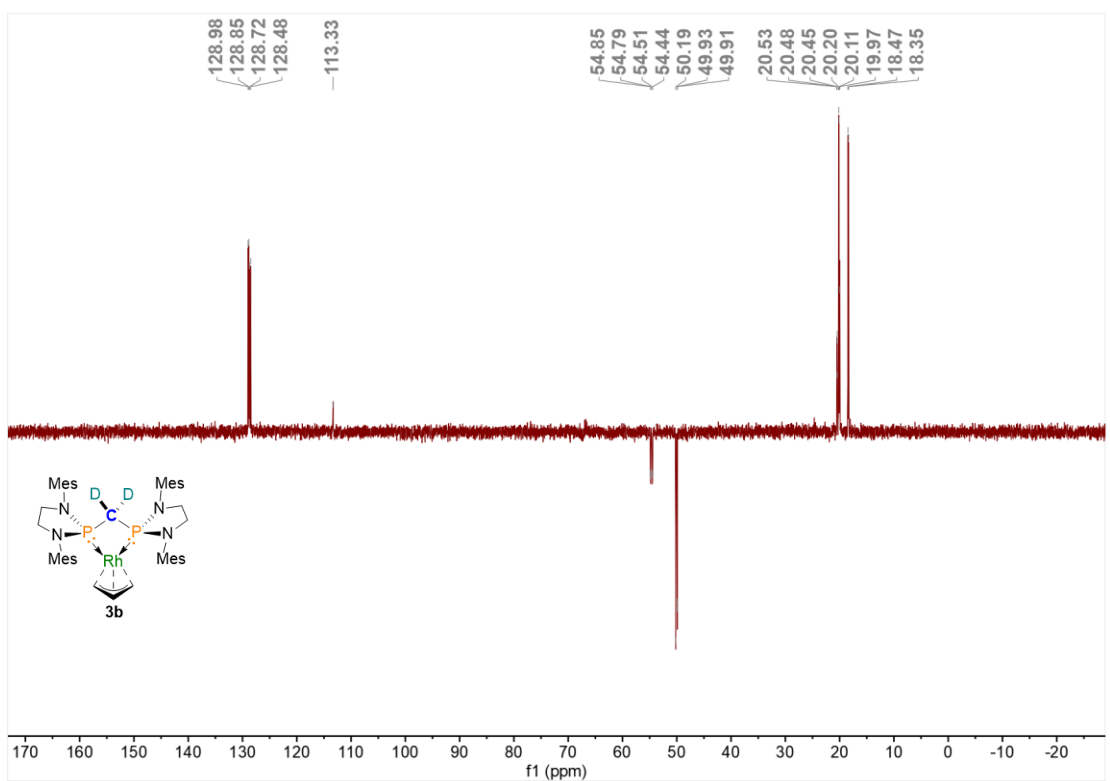

**Fig. S16.** DEPT-135  $^{13}\text{C}\{^1\text{H}\}$  NMR spectrum of **3b** (101 MHz,  $\text{THF-}d_8$ ).

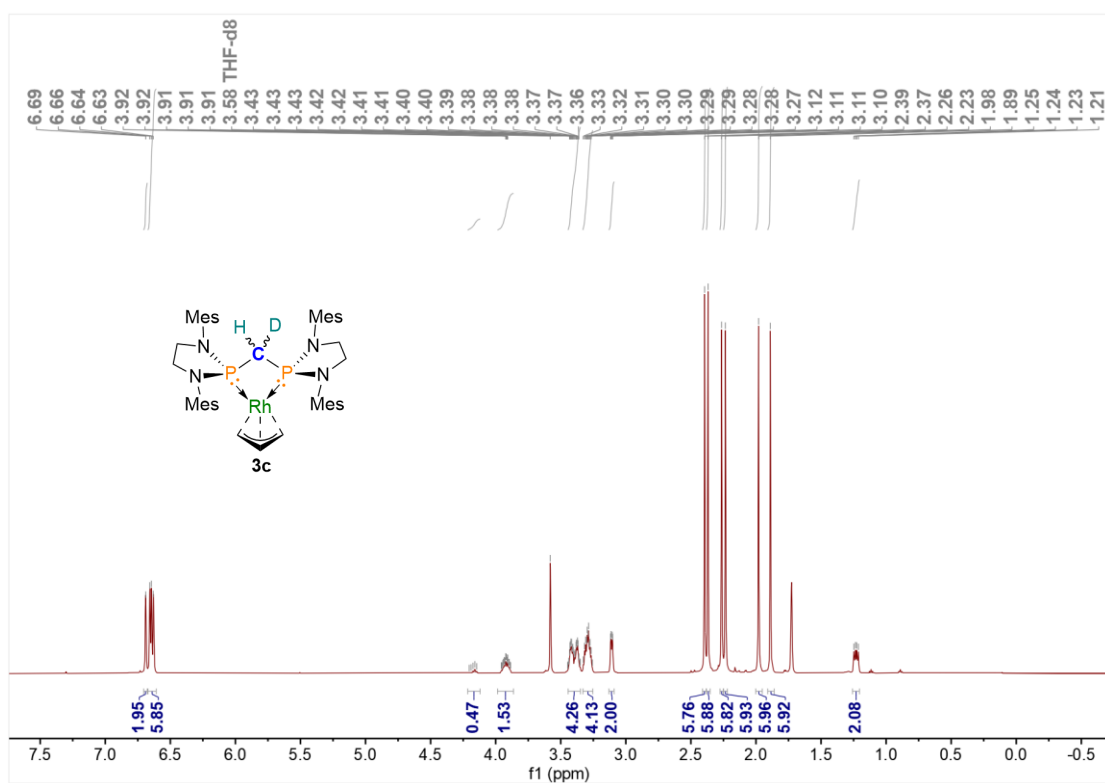

**Fig. S17.**  $^1\text{H}$  NMR spectrum of **3c** (600 MHz, THF- $d_8$ ).

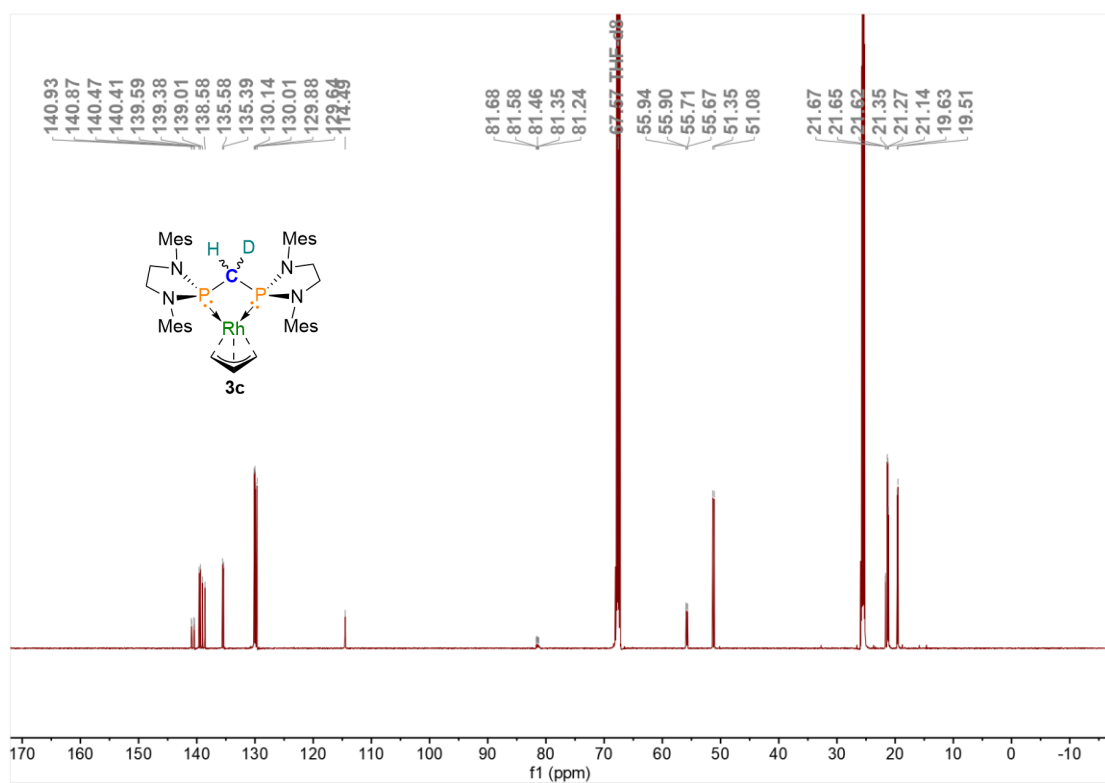

**Fig. S18.**  $^{13}\text{C}\{^1\text{H}\}$  NMR spectrum of **3c** (151 MHz, THF- $d_8$ ).

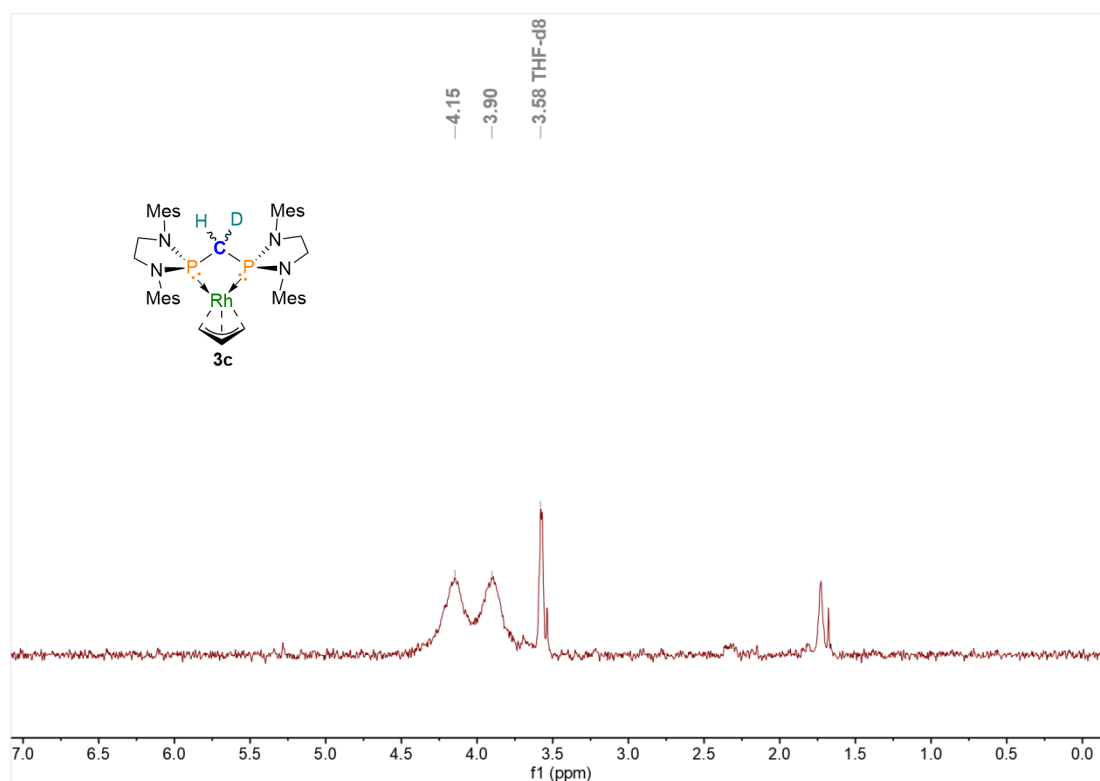

**Fig. S19.**  $^2\text{H}$  NMR spectrum of **3c** (92 MHz, THF- $d_8$ ).

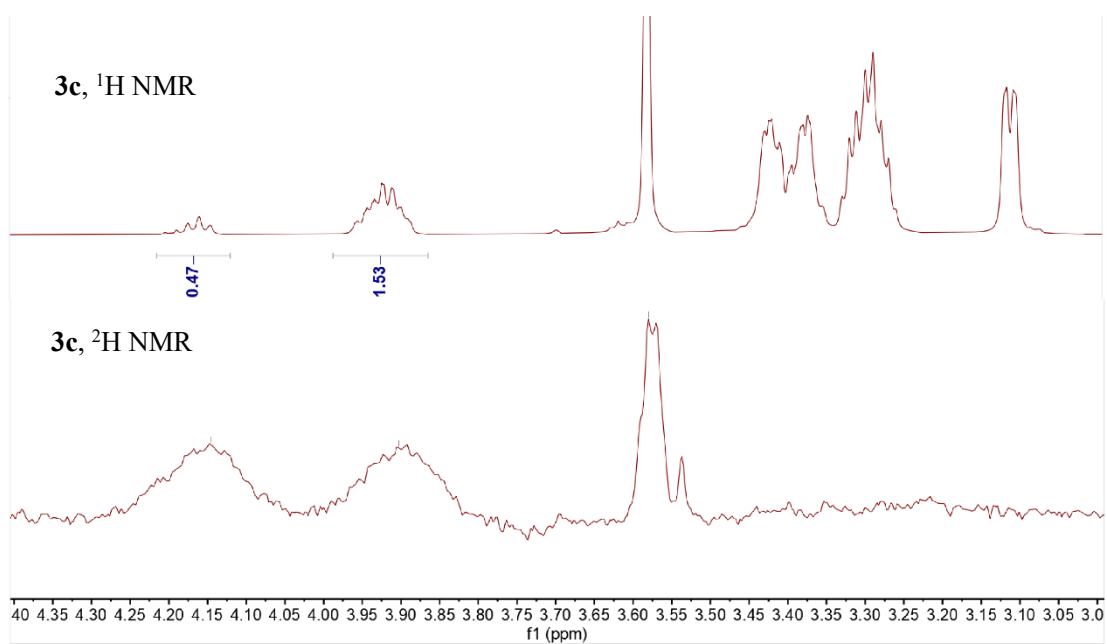

**Fig. S20.** Overlay of  $^1\text{H}$  NMR spectrum and  $^2\text{H}$  NMR spectrum of **3c**.

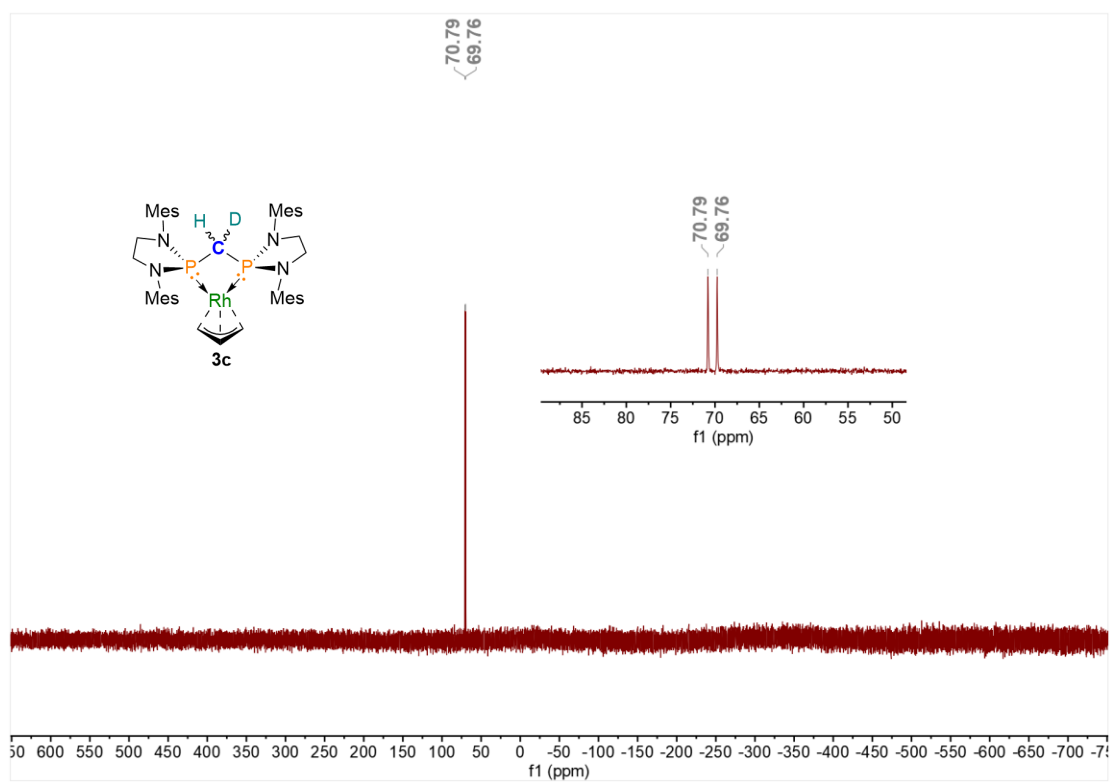

**Fig. S21.**  $^{31}\text{P}$  NMR spectrum of **3c** (243 MHz,  $\text{THF-}d_8$ ).

## IV. HRMS Spectra

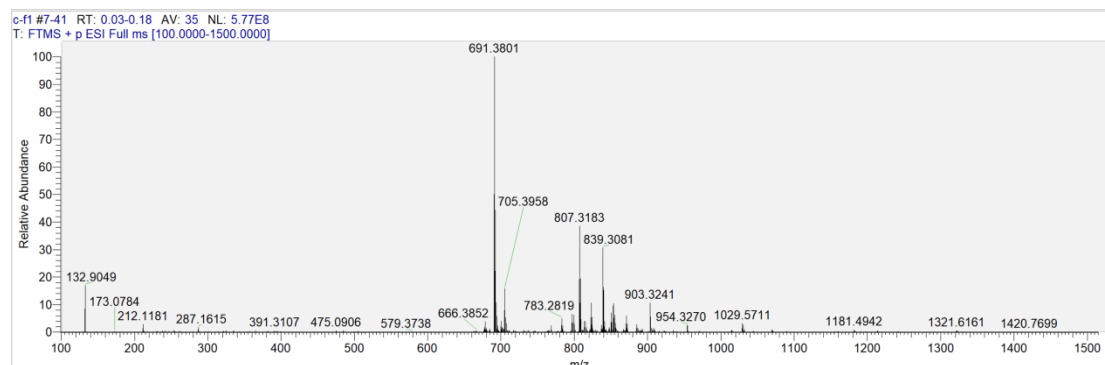

**Fig. S22.** Images for HRMS analysis of **2**. HRMS  $[M+H]^+$   $C_{44}H_{58}N_4P_2Rh^+$  calc. 807.3186 m/z, found 807.3183 m/z.

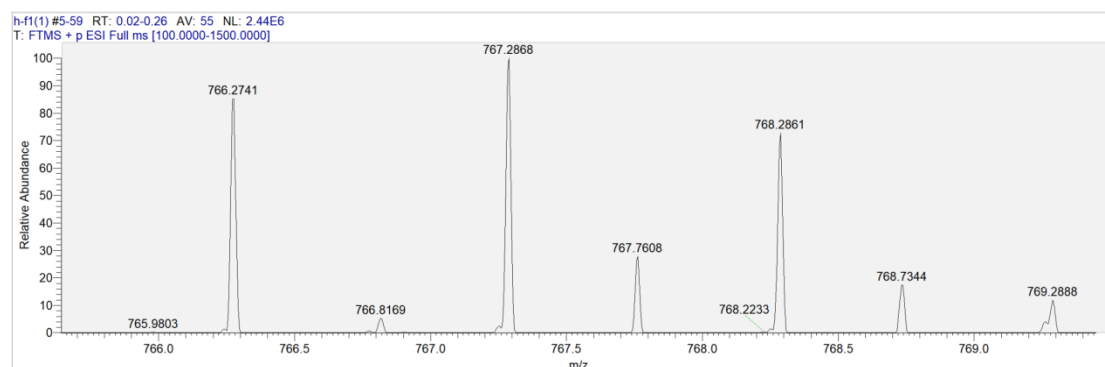

**Fig. S23.** Images for HRMS analysis of **3a**. HRMS  $[M-allyl]^+$   $C_{41}H_{54}N_4P_2Rh^+$  calc. 767.2873 m/z, found 767.2868 m/z.

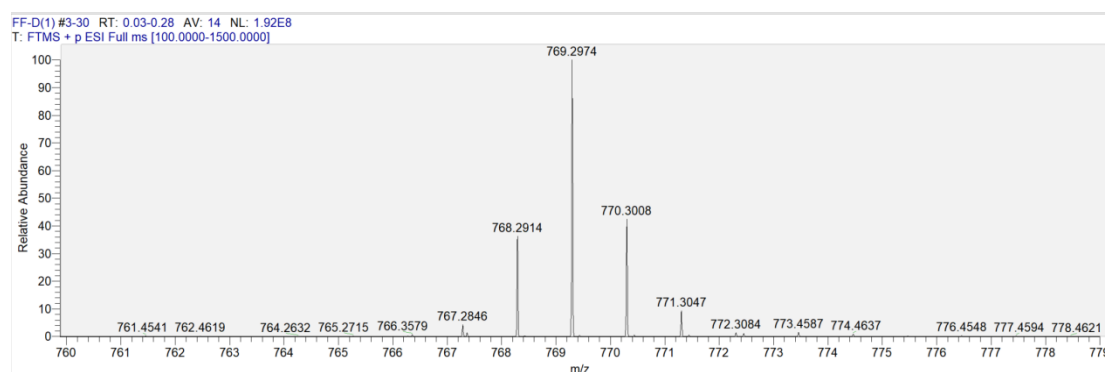

**Fig. S24.** Images for HRMS analysis of **3b**. HRMS  $[M-allyl]^+$   $C_{41}H_{52}D_2N_4P_2Rh^+$  calc. 769.2999 m/z, found 769.2974 m/z.

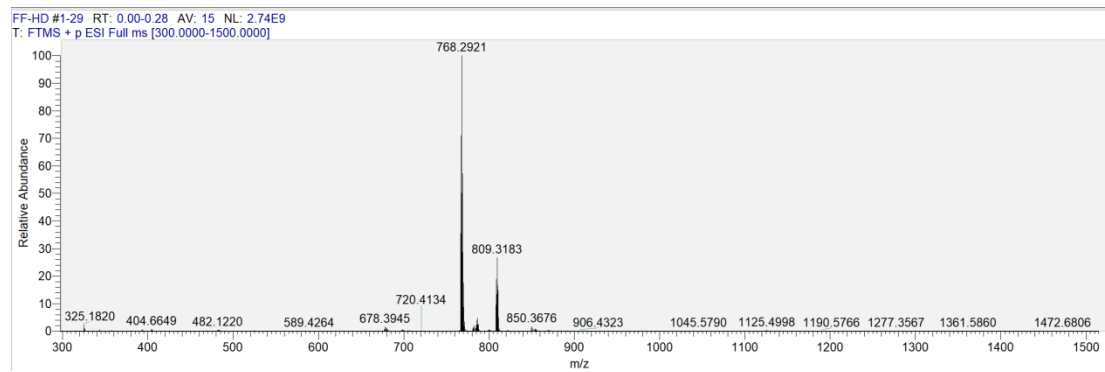

**Fig. S25.** Images for HRMS analysis of **3c**. HRMS  $[M\text{-allyl}]^+ C_{41}H_{53}DN_4P_2Rh^+$  calc. 768.2936 m/z, found 768.2921 m/z.

## V. X-ray Crystallographic Data

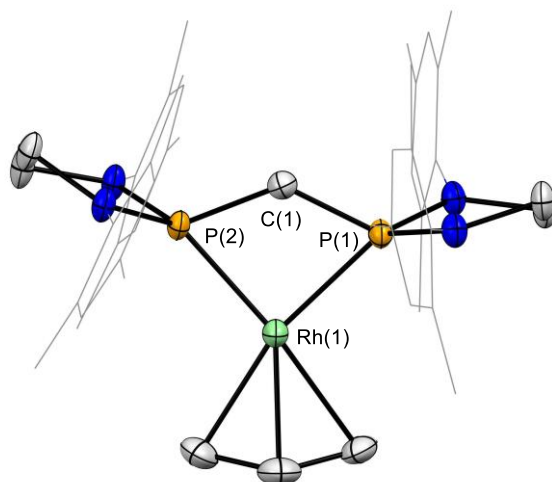

**Fig. S26.** Solid-state structure of **2**. Hydrogen atoms are omitted for clarity. Anisotropic displacement ellipsoids are set at the 40% probability level. Selected bond lengths (Å) and angles (°): P(1)–C(1) 1.6683(7), P(2)–C(1) 1.6896(7), Rh(1)–C(1) 2.2629(7), P(1)–C(1)–P(2) 132.53(4).

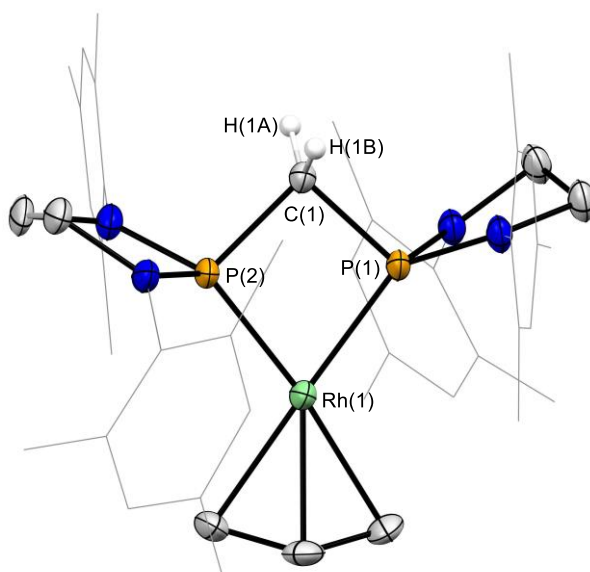

**Fig. S27.** Solid-state structure of **3a**. Hydrogen atoms are omitted for clarity. Anisotropic displacement ellipsoids are set at the 40% probability level. Selected bond lengths (Å) and angles (°): P(1)–C(1) 1.864(2), P(2)–C(1) 1.868(2), Rh(1)–C(1) 3.043(3), P(1)–C(1)–P(2) 92.59(11).

**Table S1.** Crystal data and structure refinement for **2**.

|                                             |                                                                  |
|---------------------------------------------|------------------------------------------------------------------|
| Identification code                         | 2/ 2483382                                                       |
| Empirical formula                           | C <sub>44</sub> H <sub>57</sub> N <sub>4</sub> P <sub>2</sub> Rh |
| Formula weight                              | 806.78                                                           |
| Temperature/K                               | 100.00                                                           |
| Crystal system                              | monoclinic                                                       |
| Space group                                 | P2 <sub>1</sub> /c                                               |
| a/Å                                         | 13.5686(13)                                                      |
| b/Å                                         | 14.2506(13)                                                      |
| c/Å                                         | 21.239(2)                                                        |
| $\alpha$ /°                                 | 90                                                               |
| $\beta$ /°                                  | 92.413(4)                                                        |
| $\gamma$ /°                                 | 90                                                               |
| Volume/Å <sup>3</sup>                       | 4103.2(7)                                                        |
| Z                                           | 4                                                                |
| $\rho_{\text{calc}}$ /cm <sup>3</sup>       | 1.306                                                            |
| $\mu$ /mm <sup>-1</sup>                     | 0.529                                                            |
| F(000)                                      | 1696.0                                                           |
| Crystal size/mm <sup>3</sup>                | 0.3 × 0.28 × 0.2                                                 |
| Radiation                                   | MoK $\alpha$ ( $\lambda$ = 0.71073)                              |
| 2 $\Theta$ range for data collection/°      | 4.516 to 90.54                                                   |
| Index ranges                                | -27 ≤ h ≤ 27, -28 ≤ k ≤ 28, -42 ≤ l ≤ 42                         |
| Reflections collected                       | 370099                                                           |
| Independent reflections                     | 34231 [R <sub>int</sub> = 0.0736, R <sub>sigma</sub> = 0.0321]   |
| Data/restraints/parameters                  | 34231/0/472                                                      |
| Goodness-of-fit on F <sup>2</sup>           | 1.029                                                            |
| Final R indexes [I ≥ 2 $\sigma$ (I)]        | R <sub>1</sub> = 0.0318, wR <sub>2</sub> = 0.0760                |
| Final R indexes [all data]                  | R <sub>1</sub> = 0.0456, wR <sub>2</sub> = 0.0828                |
| Largest diff. peak/hole / e Å <sup>-3</sup> | 0.90/-1.27                                                       |

**Table S2.** Crystal data and structure refinement for **3a**.

|                                             |                                                                  |
|---------------------------------------------|------------------------------------------------------------------|
| Identification code                         | <b>3a</b> / 2483383                                              |
| Empirical formula                           | C <sub>47</sub> H <sub>66</sub> N <sub>4</sub> P <sub>2</sub> Rh |
| Formula weight                              | 851.88                                                           |
| Temperature/K                               | 120.00                                                           |
| Crystal system                              | triclinic                                                        |
| Space group                                 | P-1                                                              |
| a/Å                                         | 8.8844(8)                                                        |
| b/Å                                         | 10.5133(10)                                                      |
| c/Å                                         | 25.092(3)                                                        |
| $\alpha$ /°                                 | 82.486(4)                                                        |
| $\beta$ /°                                  | 82.062(4)                                                        |
| $\gamma$ /°                                 | 77.297(4)                                                        |
| Volume/Å <sup>3</sup>                       | 2252.2(4)                                                        |
| Z                                           | 2                                                                |
| $\rho_{\text{calc}}$ /cm <sup>3</sup>       | 1.256                                                            |
| $\mu$ /mm <sup>-1</sup>                     | 2.731                                                            |
| F(000)                                      | 902.0                                                            |
| Crystal size/mm <sup>3</sup>                | 0.2 × 0.1 × 0.05                                                 |
| Radiation                                   | GaK $\alpha$ ( $\lambda$ = 1.34139)                              |
| 2 $\Theta$ range for data collection/°      | 7.54 to 118.79                                                   |
| Index ranges                                | -11 ≤ h ≤ 11, -13 ≤ k ≤ 13, -32 ≤ l ≤ 32                         |
| Reflections collected                       | 59187                                                            |
| Independent reflections                     | 9947 [R <sub>int</sub> = 0.0638, R <sub>sigma</sub> = 0.0449]    |
| Data/restraints/parameters                  | 9947/7/510                                                       |
| Goodness-of-fit on F <sup>2</sup>           | 1.072                                                            |
| Final R indexes [I ≥ 2 $\sigma$ (I)]        | R <sub>1</sub> = 0.0405, wR <sub>2</sub> = 0.0983                |
| Final R indexes [all data]                  | R <sub>1</sub> = 0.0540, wR <sub>2</sub> = 0.1046                |
| Largest diff. peak/hole / e Å <sup>-3</sup> | 0.78/-1.09                                                       |

## VI. Photophysical Data

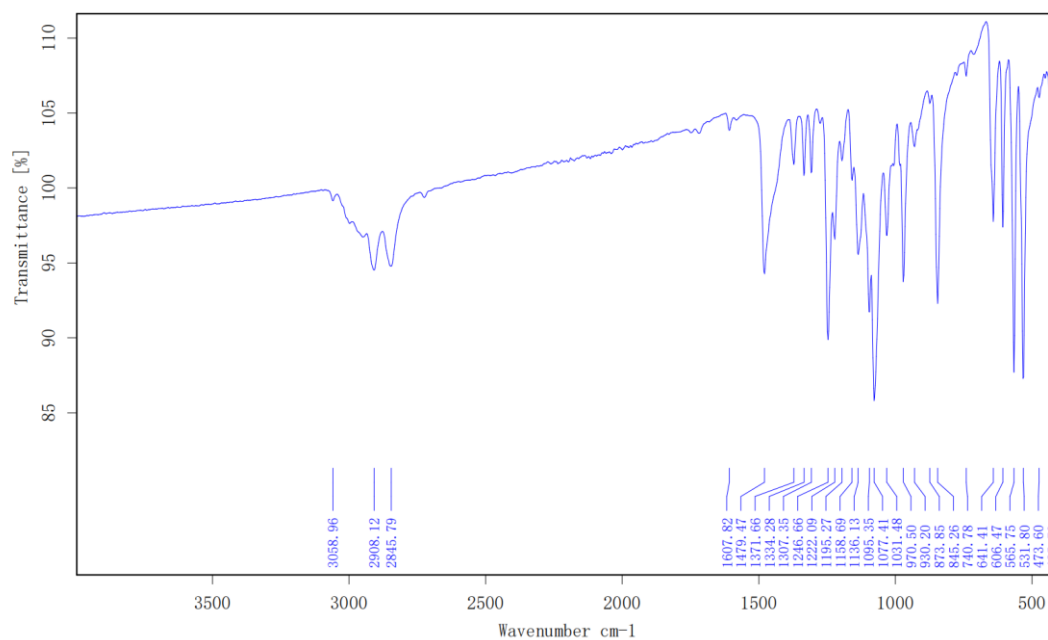

**Fig. S28.** Infrared spectrum of **2**.

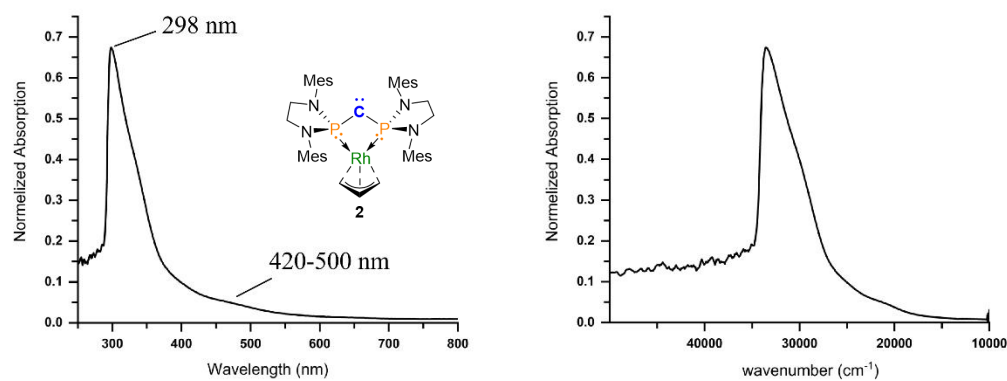

**Fig. S29.** UV-Vis spectrum of **2** in THF ( $2 \times 10^{-4}$  M). Linear legend construction based on wavelength, frequency (wavenumber), respectively.

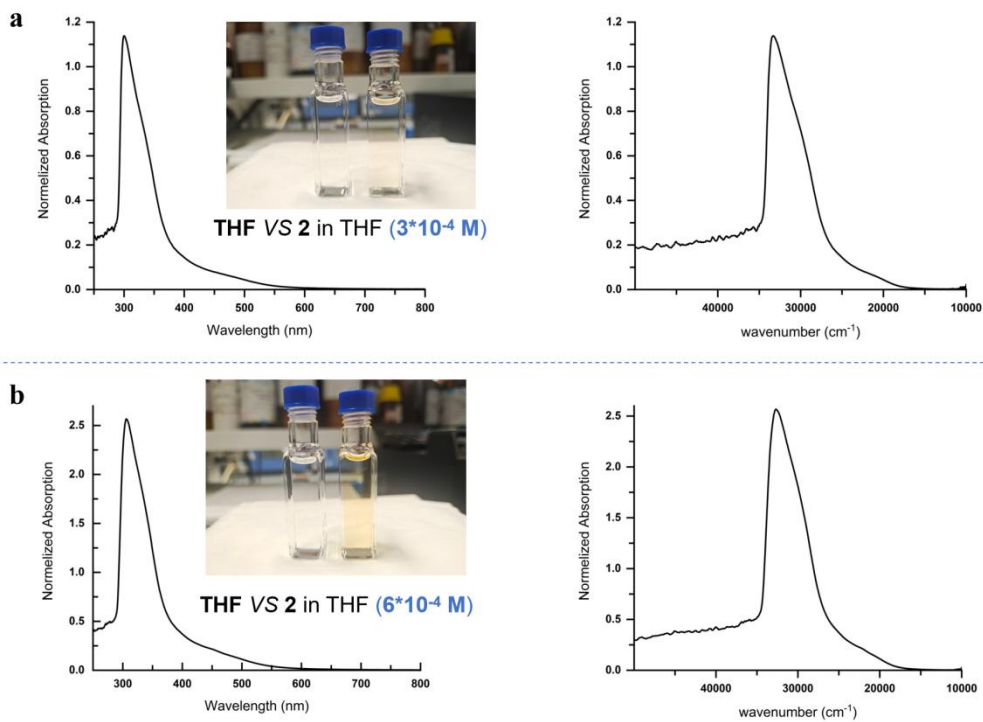

**Fig. S30.** Comparative UV-Vis results for samples with different concentrations. **a**, **2** in THF ( $3 \cdot 10^{-4}$  M). **b**, **2** in THF ( $6 \cdot 10^{-4}$  M).

## VII. Kinetic Experiments

### 7.1 Time-course kinetics for D<sub>2</sub>.

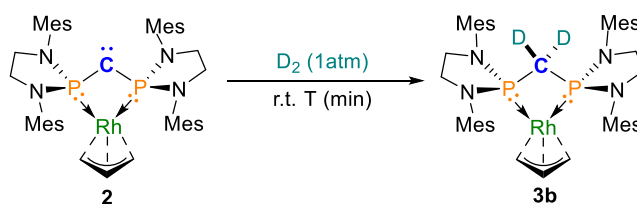

In a dried Schlenk tube, a solution of **2** (500  $\mu$ L, 0.02 M in C<sub>6</sub>D<sub>6</sub>) was combined with 1,3,5-trimethoxybenzene (100  $\mu$ L, 0.05 M in C<sub>6</sub>D<sub>6</sub>). The mixture was degassed by 3–5 freeze–pump–thaw cycles and then backfilled with 1 atm of D<sub>2</sub> at 10 °C. The reaction mixture was warmed to room temperature and stirred for a preset time. For each time point, a reaction was set up in parallel following the same protocol (including one “t = 0” control in which D<sub>2</sub> was not introduced). The concentrations of **2** and **3b** were determined by integrating well-resolved methyl resonances of the mesityl substituents relative to the methyl resonances of the internal standard, taking into account the known concentration and the number of contributing protons for each signal.

**Table S3.** Full time course tracking the evolution of **2** and **3b**.

| Time (min) | <b>3b</b> Concentration (M) | <b>2</b> Concentration (M) |
|------------|-----------------------------|----------------------------|
| 0          | 0                           | 0.01666                    |
| 60         | 0.00044                     | 0.01567                    |
| 120        | 0.00100                     | 0.01533                    |
| 180        | 0.00144                     | 0.01500                    |
| 240        | 0.00279                     | 0.01350                    |
| 360        | 0.00439                     | 0.01167                    |
| 480        | 0.00560                     | 0.01017                    |
| 600        | 0.00641                     | 0.00933                    |
| 780        | 0.00740                     | 0.00817                    |
| 960        | 0.00960                     | 0.00567                    |
| 1140       | 0.01040                     | 0.00467                    |
| 1320       | 0.01260                     | 0.00217                    |
| 1440       | 0.01400                     | 0                          |

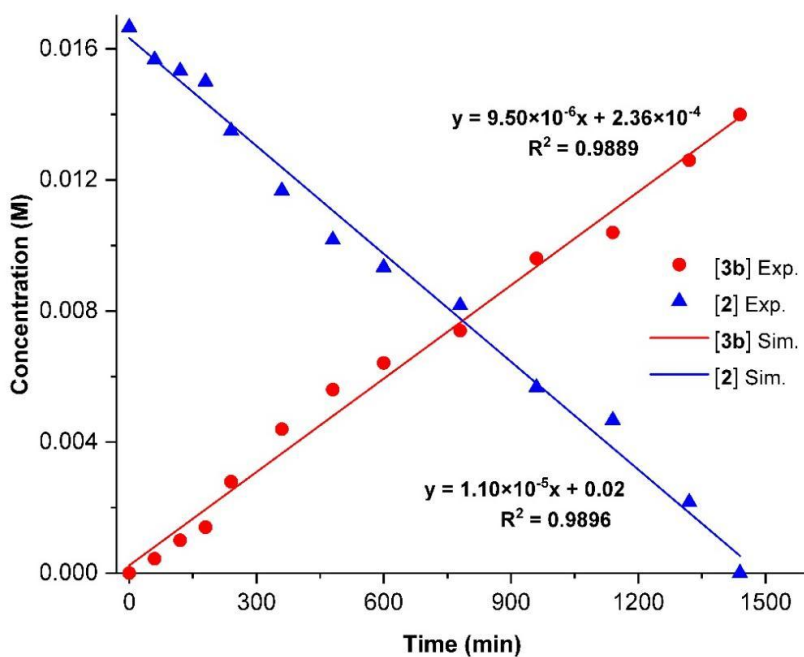

**Fig. S31.** Experimental and simulated concentration profiles of complex **2** (blue triangles) and **3b** (red circles).

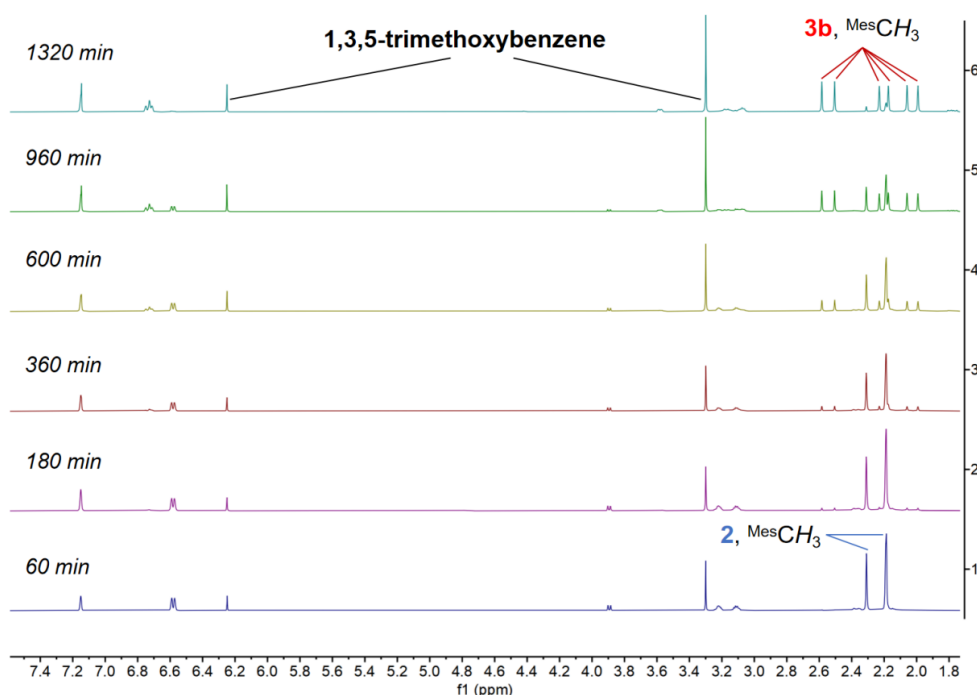

**Fig. S32.** Partial  $^1\text{H}$  NMR spectra at various times. *At the initial stage of the reaction, the mesityl (Mes) methyl protons of starting material **2** showed two sets of signals with an integral ratio of 1:2 (12H:24H). As the reaction proceeded, product **3b** was gradually formed and accumulated; correspondingly, the Mes methyl protons of **3b** exhibited six sets of signals in a 1:1:1:1:1:1 (6H:6H:6H:6H:6H:6H) integral ratio, which is consistent with its structural characteristics.*

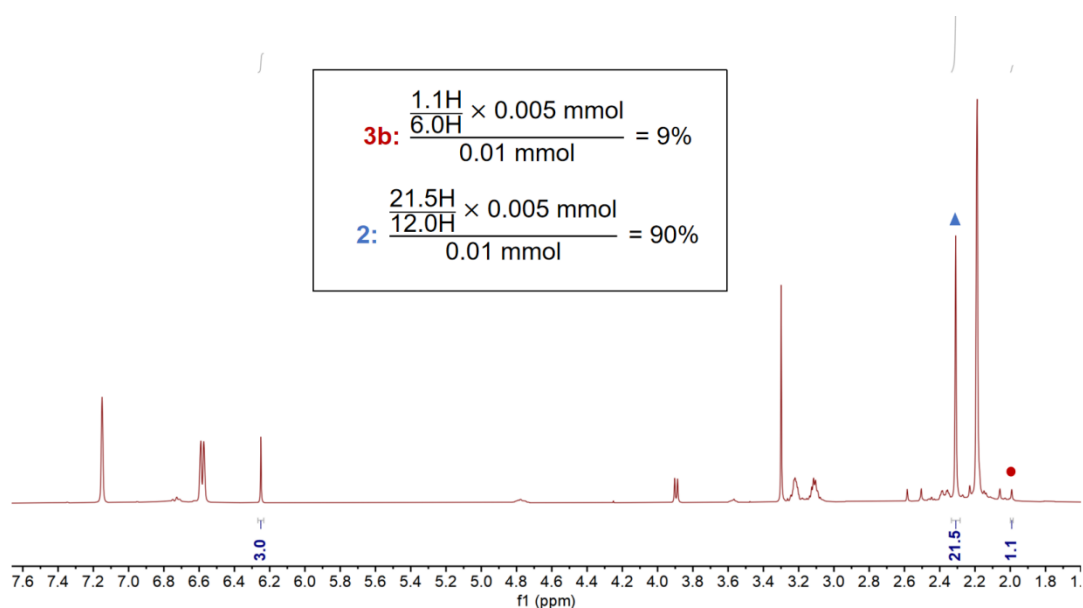

**Fig. S33.**  $^1\text{H}$  NMR Spectrum of the reaction after 180 minutes. The yield of product **3b** and the remaining percentage of starting material **2** were quantified by  $^1\text{H}$  NMR spectroscopy using an internal standard with a known number of aryl protons (3H). First, the well-resolved mesityl methyl proton signals of **2** and **3b** in the reaction mixture were integrated separately. The normalized value was divided by the theoretical number of mesityl methyl protons per mole of the corresponding compound, multiplied by the molar amount of the internal standard, and finally divided by the initial molar amount of starting material **2** to yield the yield of **3b** and the remaining percentage of **2**.

## 7.2 KIE determination from the initial-rate regime.

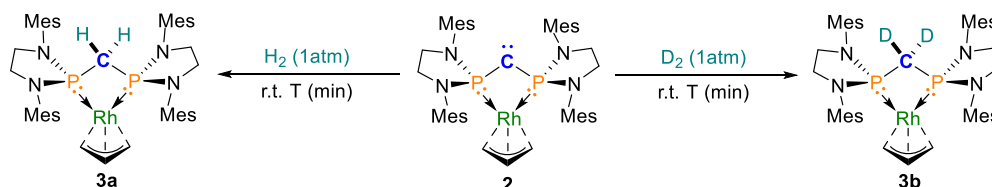

Guided by the full  $\text{D}_2$  time-course experiment above, we next performed parallel kinetic runs under  $\text{H}_2$  and  $\text{D}_2$  specifically in the low-conversion regime to extract the KIE. Using the same quantitative  $^1\text{H}$  NMR protocol (same solvent, internal standard, degassing/backfilling procedure, temperature profile, and mixing conditions), aliquots were analyzed at 60, 90, 120, and 150 min, and the concentrations of products **3a** and **3b** were determined from their methyl integrals relative to the internal standard.

Over this  $\leq 10\%$  conversion interval, the product concentration increases linearly with time for both isotopologues. Therefore, we obtained the initial-rate slopes ( $v_{0,\text{H}} = 1.28 \times 10^{-5}$  and  $v_{0,\text{D}} = 8.43 \times 10^{-6}$ ) by linear regression of [**3a**] or [**3b**] versus time, and defined the kinetic isotope effect as:

$$\text{KIE} = \frac{k_{\text{H}}}{k_{\text{D}}} \approx \frac{v_{0,\text{H}}}{v_{0,\text{D}}}$$

From the fitted slopes, we obtain  $\text{KIE} = 1.52$  at room temperature (298 K) under 1 atm of gas.

**Table S4.** Kinetic data of **3a** and **3b** at varying reaction times.

| Time (min) | <b>3a</b> Concentration (M) | <b>3b</b> Concentration (M) |
|------------|-----------------------------|-----------------------------|
| 60         | 0.00056                     | 0.00044                     |
| 90         | 0.00089                     | 0.00075                     |
| 120        | 0.00130                     | 0.00100                     |
| 150        | 0.00170                     | 0.00120                     |

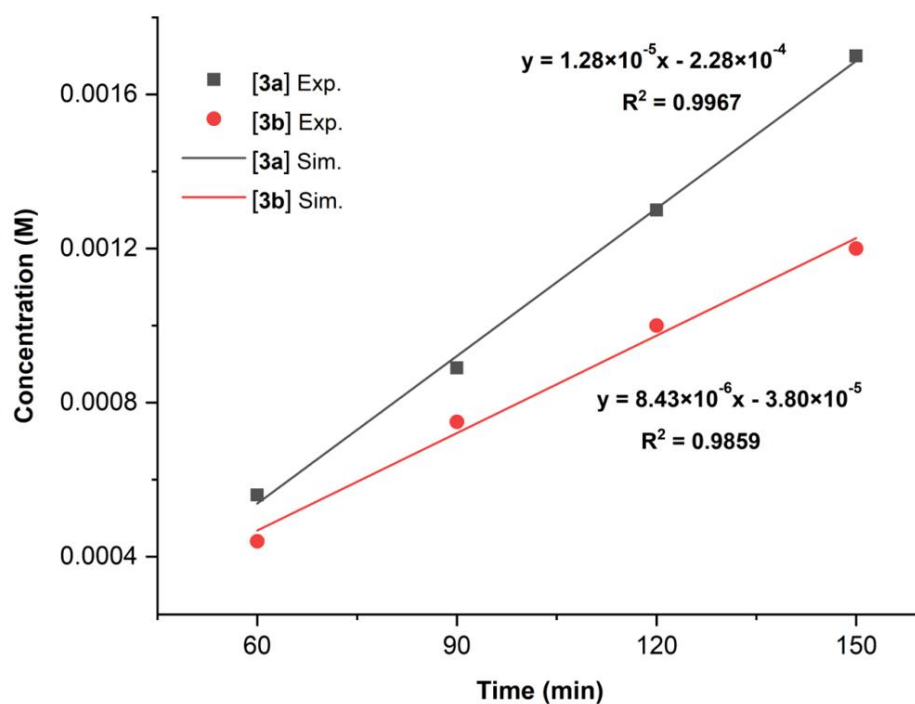

**Fig. S34.** Experimental and simulated concentration profiles of **3a** (gray squares) and **3b** (red circles). A negative intercept is observed, which we attribute to the sampling delay inherent in the experimental procedure.

## VIII. Computational Details

All molecular geometry optimizations were carried out with the Gaussian 16 software package<sup>(3)</sup> at the BP86-D3(BJ)/def2-SVP level in the gas phase under 1 atm and 298K.<sup>(4-8)</sup> Vibrational frequency calculations were conducted at the same level to verify the character of the optimized geometries, confirming them as either local minima (no imaginary frequencies) or transition states (one imaginary frequency). Single-point energy calculations were subsequently carried out on the optimized geometries at the BP86-D3(BJ)/def2-TZVP level in the gas phase to determine the relative energies. The transition states were further validated by analyzing normal mode vibrational vectors and conducting the intrinsic reaction coordinate (IRC) calculations.<sup>(9,10)</sup> Natural bond orbital (NBO) calculations were implemented with NBO 7.0 program<sup>(11)</sup> at the BP86-D3(BJ)/def2-SVP level, and intrinsic bond orbitals (IBOs) were performed with the ORCA 5.0.3 program package<sup>(12)</sup> at the same level. Optimized structures were visualized by the CYLview,<sup>(13)</sup> Chemcraft<sup>(14)</sup> or IBOview program.<sup>(15)</sup> Time-dependent density functional theory (TD-DFT) calculations were executed at the BP86-D3(BJ)/def2-TZVP level, and the results were visualized with the GaussSum program<sup>(16)</sup>. The solvation model based on density (SMD)<sup>(17)</sup> was employed for the TD-DFT calculations with THF as the solvent. The electron localization function (ELF) analyses<sup>(18)</sup> were carried out using Amsterdam Modeling Suite<sup>(19)</sup> at the BP86-D3(BJ)/TZP level. Heavy-atom root-mean-square deviation (RMSD) calculations were performed with Chemcraft program.<sup>(20)</sup>

## 8.1 Geometry optimization and singlet–triplet energy gap of **2**.

**Table S5.** Selected bond lengths (Å) and angles (°) for the solid and the optimized structures of **2**.

|                 | Solid structure | Optimized structure |
|-----------------|-----------------|---------------------|
| P(1)–C(1)       | 1.6683(7)       | 1.71213             |
| P(2)–C(1)       | 1.6896(7)       | 1.68205             |
| Rh(1)–C(1)      | 2.2629(7)       | 2.29438             |
| P(1)–Rh(1)      | 2.2084(2)       | 2.23202             |
| P(2)–Rh(1)      | 2.2107(2)       | 2.23972             |
| P(1)–C(1)–P(2)  | 132.53(4)       | 132.28848           |
| C(1)–P(1)–Rh(1) | 69.84(3)        | 69.72016            |
| C(1)–P(2)–Rh(1) | 69.46(3)        | 69.96403            |
| P(1)–Rh(1)–P(2) | 88.151(10)      | 87.92500            |

**Table S6.** Singlet–triplet energy gap ( $\Delta E_{S-T}$ ) of **2**.

|                             | Electronic Energy (Hartree) | $\Delta E_{S-T}$ (kcal/mol) |
|-----------------------------|-----------------------------|-----------------------------|
| <b>2</b> <sub>triplet</sub> | -2723.694346                | 0.00000                     |
| <b>2</b> <sub>singlet</sub> | -2723.729190                | -21.86547                   |

## 8.2 TDDFT calculations of **2**.

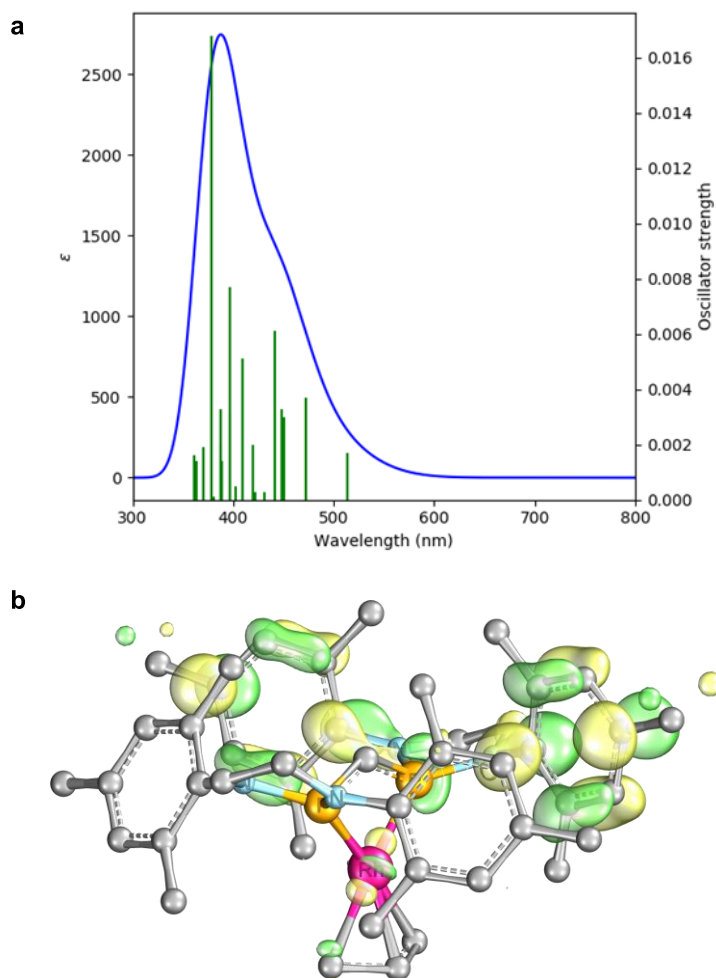

**Fig. S35.** **a**, Simulated UV-vis spectrum of **2** from TD-DFT calculations. The absorptions at 513 nm and 472 nm are mainly attributed to the transitions (HOMO→LUMO, 99%) and (HOMO→LUMO+1, 99%), respectively. **b**, LUMO+1 orbital of **2**.

### 8.3 NMR calculations

At the CPCM-wB97X-D3/def2TZVP level of theory, the computed chemical shift for the carbene carbon in **2** is  $-27.0$  ppm (Table S7), which is in good agreement with the experimental value of  $-22.7$  ppm.

It is well established that, for nuclei involved in bonding schemes dominated by p orbitals, the paramagnetic contribution ( $\sigma_{\text{para}}$ ) plays an important role in determining chemical shift. In conventional NHCs, the characteristic high-frequency  $^{13}\text{C}$  resonances are generally attributed to strong paramagnetic deshielding.

To elucidate why the carbene carbon in **2** resonates at an unusually low frequency, we compared its magnetic shielding components with those of IAd (1,3-di(adamantyl)-1,3-dihydro-2*H*-imidazol-2-ylidene) (Fig. S37). The shielding tensors were decomposed into their diamagnetic ( $\sigma_{\text{dia}}$ ) and paramagnetic ( $\sigma_{\text{para}}$ ) contributions along the three principal axes (Tables S8 and S9).

For IAd, the diamagnetic shielding is positive but relatively uniform, with  $\sigma_{\text{dia}}$  values ranging from 254.9 to 277.9 ppm, whereas the paramagnetic deshielding is pronounced along all three axes ( $\sigma_x = -287.0$  ppm,  $\sigma_y = -110.5$  ppm,  $\sigma_z = -512.3$  ppm), resulting in an overall  $\sigma_{\text{iso}}$  of  $-33.7$  ppm. In contrast, **2** exhibits a dual effect: not only is the paramagnetic deshielding substantially attenuated ( $\sigma_x = -173.1$  ppm,  $\sigma_y = -109.7$  ppm,  $\sigma_z = +77.8$  ppm), but the diamagnetic shielding is also moderately enhanced, with  $\sigma_{\text{dia}}$  values ranging from 253.6 to 304.0 ppm. Together, these effects lead to a markedly larger isotropic shielding ( $\sigma_{\text{iso}} = 207.4$  ppm).

Consequently, the unusually low-frequency  $^{13}\text{C}$  resonance of the carbene center in **2** originates from the combined influence of diminished paramagnetic deshielding and modestly strengthened diamagnetic shielding, resulting in a highly shielded electronic environment that stands in sharp contrast to that of conventional NHCs.

To further elaborate on the paramagnetic (de)shielding contributions of both **2** and IAd, we conducted a detailed analysis of their magnetic couplings. The overall paramagnetic (de)shielding is a sum of the major magnetic couplings, which are accompanied by many smaller couplings; however, for clarity, we focused on the most significant contributions.

In the case of IAd, all major magnetic couplings contribute to paramagnetic deshielding of the carbene carbon, with the dominant contribution arising from the HOMO $\rightarrow$ LUMO+2 transition ( $-167.2$  ppm, accounting for 32.6% of  $\sigma_z$ ; Fig. S38). This strong and uniformly deshielding pattern is characteristic of conventional NHCs and underlies their high-frequency  $^{13}\text{C}$  resonances.

In sharp contrast, the situation in **2** is qualitatively different (Fig. S39). Of the four largest magnetic couplings, three contribute to paramagnetic shielding, while only one gives rise to a minor deshielding contribution. These major transitions contribute  $+49.0$ ,  $+63.4$ , and  $+23.6$  ppm, respectively, with the HOMO-16 $\rightarrow$ LUMO and HOMO-2 $\rightarrow$ LUMO excitations accounting for 63.0% and 81.5% of  $\sigma_z$ . Notably, all four dominant couplings involve orbitals with substantial mixed C/Rh character, indicating that metal-carbene orbital interactions play a decisive role in shaping the magnetic response at the carbene carbon.

Taken together, these results show that the unusually low-frequency  $^{13}\text{C}$  NMR resonance of the rhodadiphosphinocarbene does not arise solely from its unconventional  $\sigma^0\pi^2$  electronic configuration, but is critically reinforced by Rh participation, which reshapes the key orbital transition manifold governing paramagnetic (de)shielding.

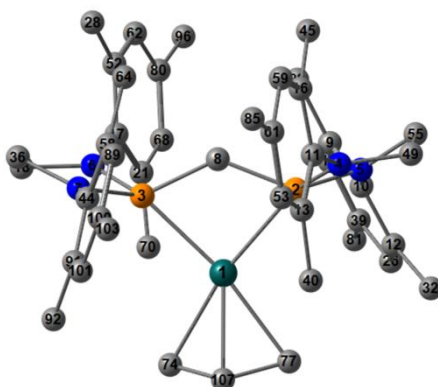

**Fig. S36.** Optimized geometry of **2**.

**Table S7.** Computed  $^{13}\text{C}$  NMR chemical shift (ppm) of the carbene carbon in **2**, with C(107) (carbon of allylic CH) taken as the reference.

| Atomic number | Calculated magnetic shielding tensor (ppm) | $^{13}\text{C}$ NMR chemical shifts (ppm) |
|---------------|--------------------------------------------|-------------------------------------------|
| 107           | 80.415                                     | 100.0 (experiment value)                  |
| 8             | 207.444                                    | -27.0 (calculated value)                  |

The geometries of **2** and IAd (1,3-di(adamantyl)-1,3-dihydro-2*H*-imidazol-2-ylidene, Fig. S37) were first optimized at the BP86-D3(BJ)/def2-SVP level using the Gaussian 16 software package(3). The resulting structures were then adopted as input for the calculations of  $^{13}\text{C}$  NMR shielding shift using the ORCA 5.0.3 program package(12), with the range-separated hybrid functional wB97X-D3(21) combined with the def2-TZVP basis set. The conductor-like polarizable continuum model (CPCM) (22-25) was utilized to account for solvation effects, with THF as the solvent. The absolute shielding tensor of the carbene center obtained from these calculations were then converted to chemical shifts ( $\delta$  ppm) using eq. 1:

$$\delta_{\text{sample}} = \sigma_{\text{ref}} - \sigma_{\text{sample}} + \delta_{\text{ref (exp.)}} \quad (1)$$

Herein,  $\sigma_{\text{ref}}$  represents the calculated shielding constant of a reference carbon (the carbon of an allylic CH in **2**),  $\sigma_{\text{sample}}$  is that of the carbene carbon in the sample, and  $\delta_{\text{sample}}$  denotes the shielding constant of the carbene carbon in the sample,  $\delta_{\text{ref (exp.)}}$  is the experimentally observed chemical shift of the reference carbon. The calculated  $^{13}\text{C}$  NMR shielding ( $\sigma$ ) of the reference carbon (in THF) = 80.415 ppm, and  $\delta_{\text{ref (exp.)}}$  is 100.0 ppm (referenced to TMS at 0 ppm). The molecular orbitals were visualized by the Avogadro 1.2.0 program.(26)

**Table S8.** Calculated chemical shielding values (in ppm) of IAd at the CPCM-wB97X-D3/def2-TZVP level in THF solution.

|                       | $\sigma_{\text{total}}$ | $\sigma^{\text{dia}}$ | $\sigma^{\text{para}}$ |
|-----------------------|-------------------------|-----------------------|------------------------|
| $\sigma_{\text{iso}}$ | -33.673                 | 269.589               | -303.261               |
| $\sigma_{\text{x}}$   | -9.068                  | 277.906               | -286.975               |
| $\sigma_{\text{y}}$   | 144.418                 | 254.925               | -110.507               |
| $\sigma_{\text{z}}$   | -236.367                | 275.935               | -512.302               |

**Table S9.** Calculated chemical shielding values (in ppm) of **2** at the CPCM-wB97X-D3/def2-TZVP level in THF solution.

|                       | $\sigma_{\text{total}}$ | $\sigma^{\text{dia}}$ | $\sigma^{\text{para}}$ |
|-----------------------|-------------------------|-----------------------|------------------------|
| $\sigma_{\text{iso}}$ | 207.444                 | 275.801               | -68.356                |
| $\sigma_x$            | 130.890                 | 304.012               | -173.122               |
| $\sigma_y$            | 159.995                 | 269.732               | -109.736               |
| $\sigma_z$            | 331.447                 | 253.659               | 77.789                 |

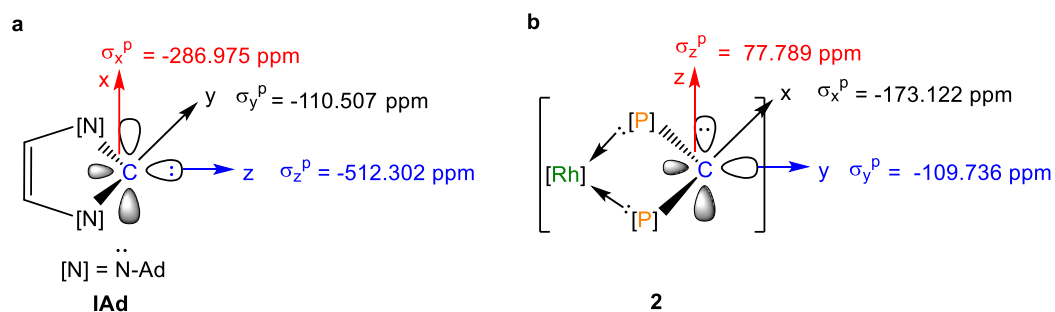

**Fig. S37.** Calculated chemical shielding values on the x, y, z axes of IAd (a) and **2** (b). The total paramagnetic shielding term ( $\sigma_x^{\text{p}}$ ,  $\sigma_y^{\text{p}}$  and  $\sigma_z^{\text{p}}$ ) along the respective x, y, z axes are given.

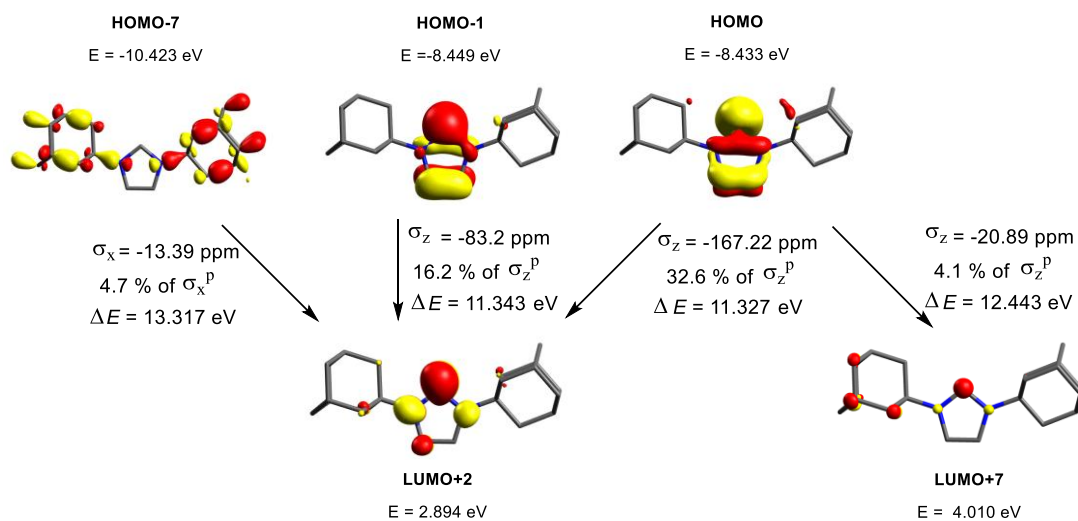

**Fig. S38.** Important magnetic couplings for the paramagnetic shielding term of IAd. For each coupling pathway, its contribution and percentage to the total paramagnetic shielding term ( $\sigma_x^{\text{p}}$ ,  $\sigma_z^{\text{p}}$ ), and the energy difference of the constituent canonical MOs are given.

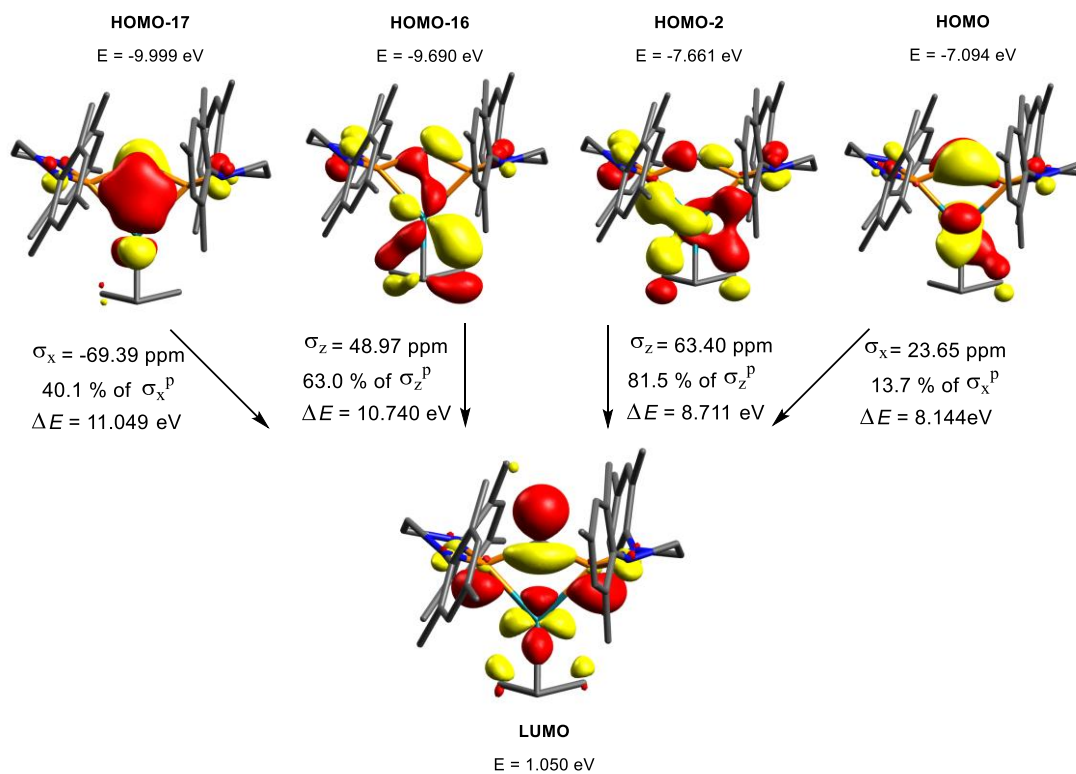

**Fig. S39.** Important magnetic couplings for the paramagnetic shielding term of complex 2. For each coupling pathway, its contribution and percentage to the total paramagnetic shielding term ( $\sigma_x^p$ ,  $\sigma_z^p$ ), and the energy difference of the constituent canonical MOs are given.

#### 8.4 Regarding the observed asynchronicity

We note that the steric and structural anisotropy associated with the allyl fragment can promote asynchronous H-H addition. To explicitly probe this effect, we constructed a model system (**2-acac**) in which the  $\eta^3$ -allyl is replaced by an acetylacetonate (acac) ligand, thereby rendering the regions above and below the carbene center nearly symmetric. Notably, even in this model system, the computed transition structure for H<sub>2</sub> addition remains distinctly asynchronous (Fig. S40).

Further analysis reveals that, upon geometry optimization, the pocket defined by the [(CH<sub>2</sub>)(NMe<sub>3</sub>)<sub>2</sub>P] substituents cannot achieve complete symmetry due to their intrinsic conformational flexibility in both **2** and **2-acac**. Even when the four Me<sub>3</sub> groups are replaced by hydrogen atoms, the pocket remains conformationally anisotropic. This intrinsic conformational asymmetry provides a natural origin for the observed asynchronicity.

To interrogate the origin of synchronicity versus asynchronicity more systematically, we modeled four cyclic diboryl carbenes (DBC<sub>s</sub>) featuring different substituents at boron and/or backbone modifications (Fig. S41). In the singlet state, all four systems adopt a  $\sigma^0\pi^2$  electronic configuration. Importantly, the H/H, H/Me<sub>3</sub>, and Me<sub>3</sub>/Me<sub>3</sub> substituted DBC<sub>s</sub> possess high symmetry above and below the carbene center and exhibit nearly synchronous H-H addition. In contrast, backbone modification (replacement of two *syn*-H atoms by methyl groups) generates an asymmetric environment around the carbene center; modeling of this asymmetric DBC with H<sub>2</sub> indeed results in asynchronous H-H addition.

These results demonstrate that the observed asynchronicity in our system is not an intrinsic electronic feature of the  $\sigma^0\pi^2$  carbene framework, but rather arises from steric and structural anisotropy in the approach pocket. As H<sub>2</sub> approaches the carbene center, the asymmetric pocket environment weakly polarizes the H-H bond and enforces a slightly slanted approach geometry in the transition region. This, in turn, enables preferential orbital interaction not only between  $\sigma(\text{H}_2)$  and in-plane  $\sigma$ -accepting orbital but also one out-of-plane  $\pi$ -donating orbital of the carbene and one lobe of  $\sigma^*(\text{H}_2)$ , imparting partial heterolytic character and favoring unequal development of the two incipient C-H interactions. During geometry optimization, the system therefore converges to an asynchronous yet concerted transition state.

Consistent with this interpretation, constrained relaxed potential energy scans enforcing a strictly symmetric (synchronous) pathway—by fixing the two forming C-H distances to be equal—lead to a transition-state-like structure (**TS3**) at a C-H distance of 1.64 Å (Fig. S42). This structure represents a pseudo-transition state and corresponds to a higher-energy stationary point (0.86 kcal mol<sup>-1</sup> above the true asynchronous **TS1**). **TS3** exhibits two imaginary frequencies: one associated with H-H bond cleavage (-899 cm<sup>-1</sup>) and a second corresponding to the symmetry-breaking coordinate (-383 cm<sup>-1</sup>). In contrast, unconstrained optimization initiated from **TS3** converges to the true first-order saddle point (**TS1**), characterized by a single dominant imaginary frequency and an intrinsically asynchronous pattern of bond formation.

We therefore conclude that the observed asynchronicity arises from inherent conformational asymmetry and steric/structural anisotropy of the reactive pocket. The hydrogenation proceeds via a concerted  $\sigma$ -face pathway, in which minimal atom reorganization is maintained, while subtle geometric anisotropy naturally leads to asynchronous C-H bond formation.

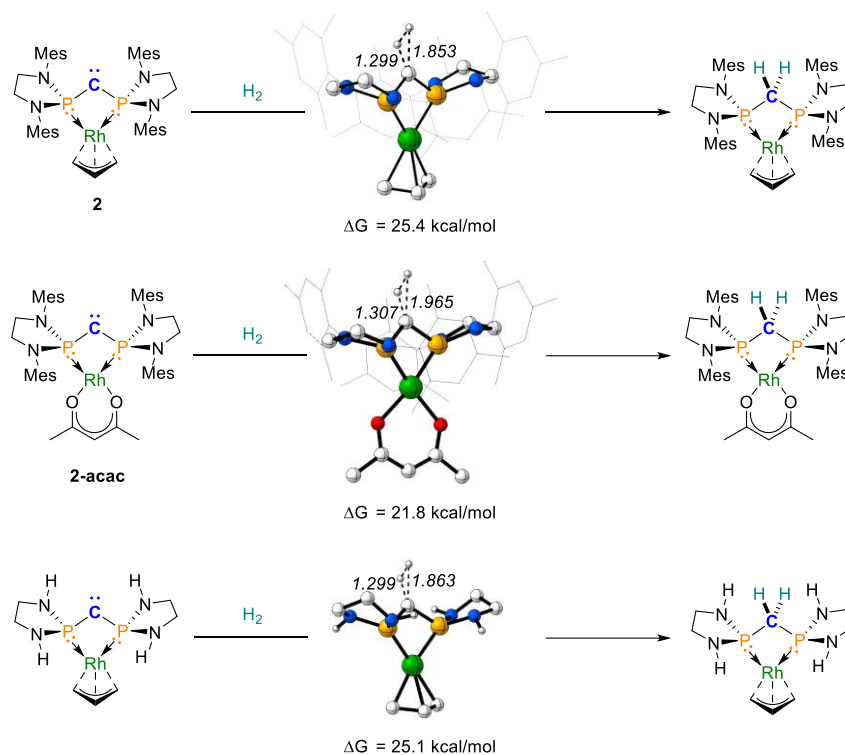

**Fig. S40.** Comparison of the effects of allyl/acac ligands and mesityl-to-hydrogen substitution on H-H addition synchronicity. *Notably, the computed transition structure for  $H_2$  addition remains distinctly asynchronous.*

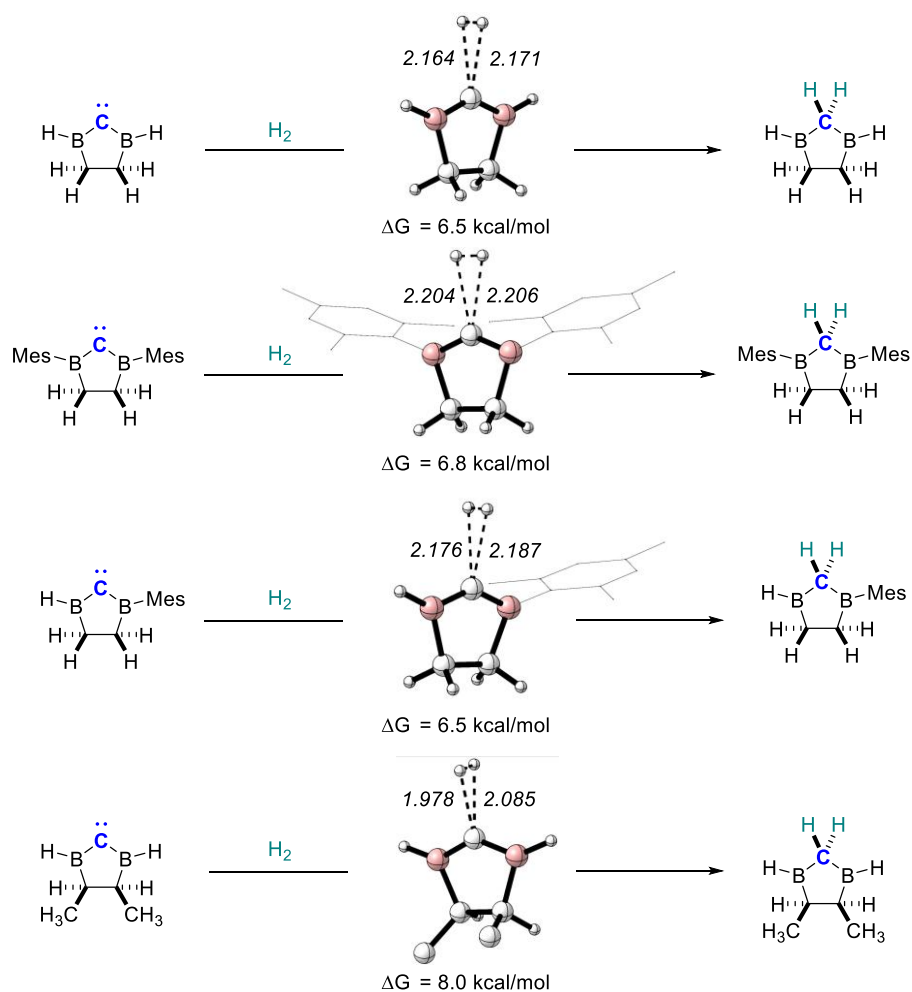

**Fig. S41.** Substituent/backbone modification effects on H-H addition synchronicity of cyclic diboryl carbenes. *Symmetric DBCs (H/H, H/Mes, Mes/Mes): nearly synchronous H-H addition; Methyl-substituted asymmetric DBC: asynchronous H-H addition.*

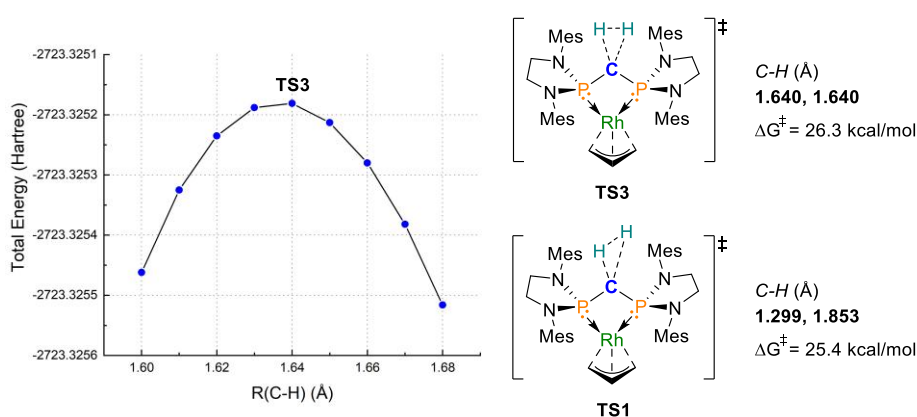

**Fig. S42.** Relaxed potential energy scan for C-H bond formation: synchronous pseudo-TS (**TS3**, 1.640 Å, 26.3 kcal mol<sup>-1</sup>) vs. asynchronous true TS (**TS1**, 1.299/1.853 Å, 25.4 kcal mol<sup>-1</sup>).

### 8.5 IBO calculations for 2.

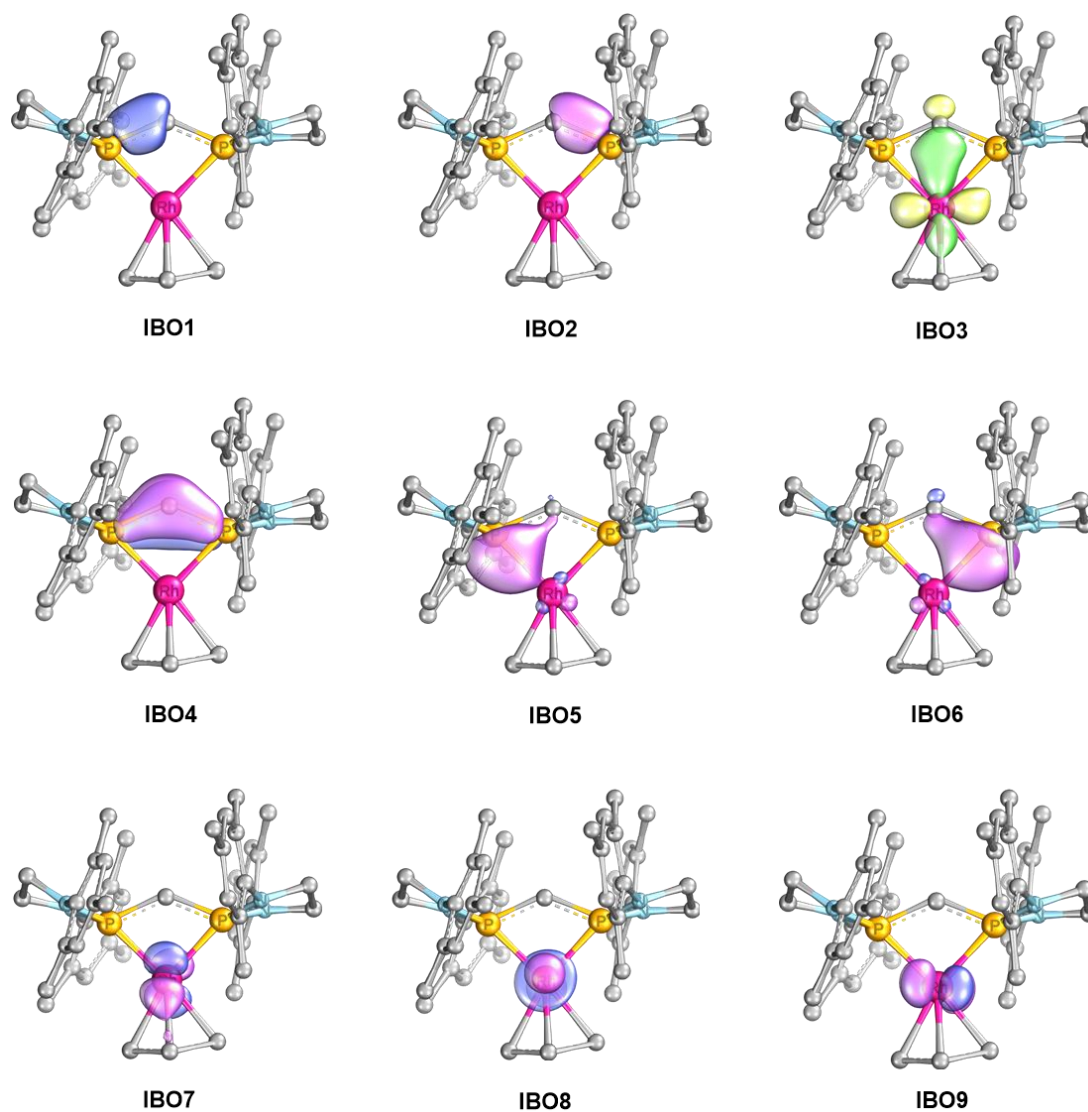

**Fig. S43.** Depiction of selected IBOs of **2**. (**IBO1**) P(1)–C(1)  $\sigma$ -bonding orbital. (**IBO2**) P(2)–C(1)  $\sigma$ -bonding orbital. (**IBO3**)  $\sigma$  donation (in-plane) from the Rh center. (**IBO4**) C(1) lone pair orbital. (**IBO5**) P(1)–Rh(1)  $\sigma$ -bonding orbital. (**IBO6**) P(2)–Rh(1)  $\sigma$ -bonding orbital. (**IBO7**, **IBO8** and **IBO9**) Rh(1) nonbonding d-orbitals (lone-pair orbitals). Threshold value = 73%.

8.6 FMOs calculations for cationic  $\sigma^0\pi^2$  carbene **A**.

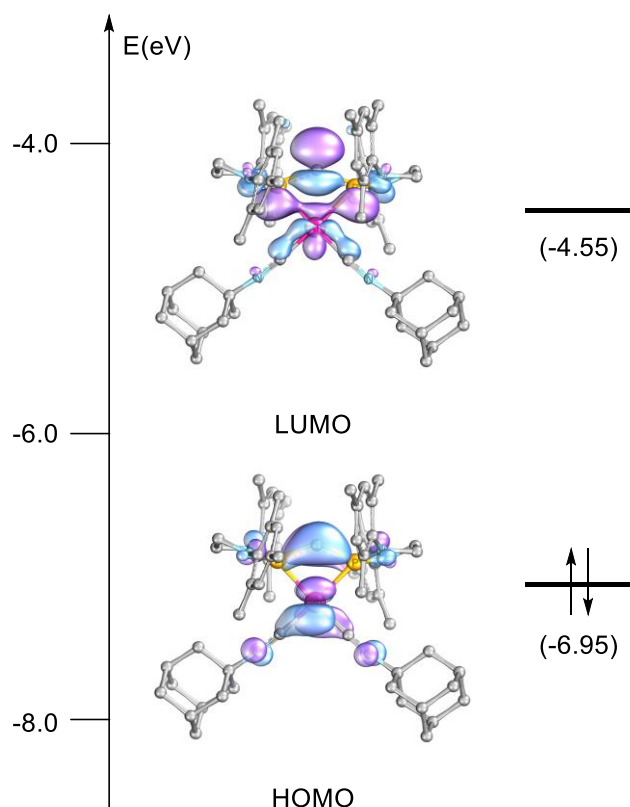

**Fig. S44.** Energy diagram for the frontier Kohn-Sham orbitals. Threshold value = 73%.

8.7 Gibbs free energy profiles for H<sub>2</sub> activation by **2** and CAAC (kcal/mol).

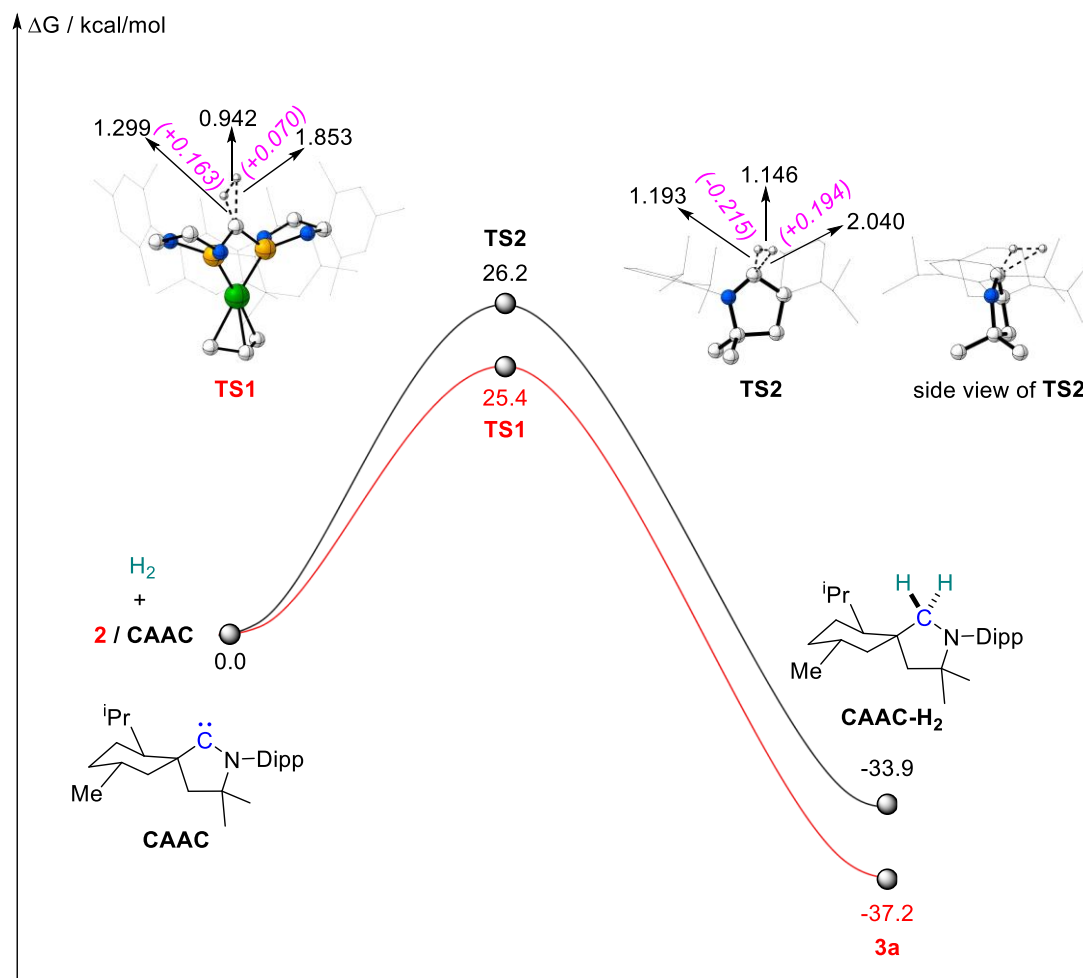

**Fig. S45.** DFT-calculated free-energy profile (kcal/mol) for H<sub>2</sub> activation by **2** (red) and CAAC (black). Selected bond lengths (Å) and NPA charges (a.u., in parentheses) of the two hydrogen atoms (TS1 and TS2).

**Table S10.** Enthalpy (ΔH) and entropy (ΔS) changes for the hydrogenation of **2**.

|                 | <b>2</b> +H <sub>2</sub> | <b>TS1</b> | <b>3a</b> |
|-----------------|--------------------------|------------|-----------|
| ΔH (kcal/mol)   | 0.0                      | 17.0       | -47.3     |
| ΔS kcal/(mol·K) | 0.0                      | -28.2      | -34.0     |

**Table S11.** Enthalpy (ΔH) and entropy (ΔS) changes for the hydrogenation of CAAC.

|                 | CAAC+H <sub>2</sub> | <b>TS2</b> | CAAC-H <sub>2</sub> |
|-----------------|---------------------|------------|---------------------|
| ΔH (kcal/mol)   | 0.0                 | 17.1       | -42.5               |
| ΔS kcal/(mol·K) | 0.0                 | -30.7      | -28.9               |

## 8.8 Heavy-atom root-mean-square deviation (RMSD) of **2** and CAAC.

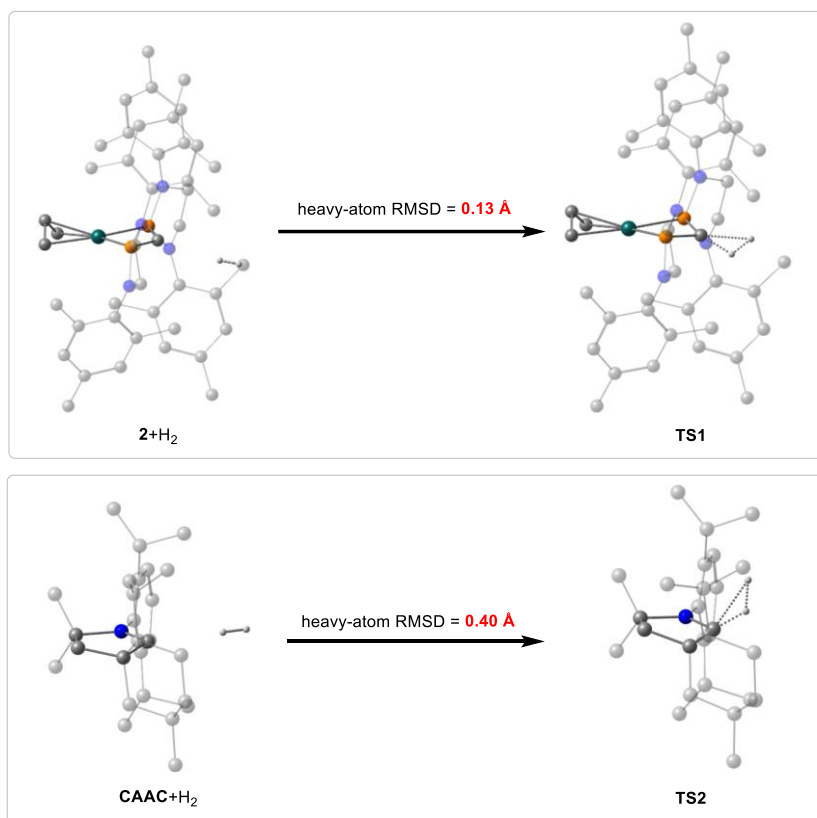

**Fig. S46.** Comparative RMSD of **2** (above) and CAAC (below). Heavy-atom = any atom except H.

## 8.9 Activation strain model (ASM) analysis of **2** and CAAC.

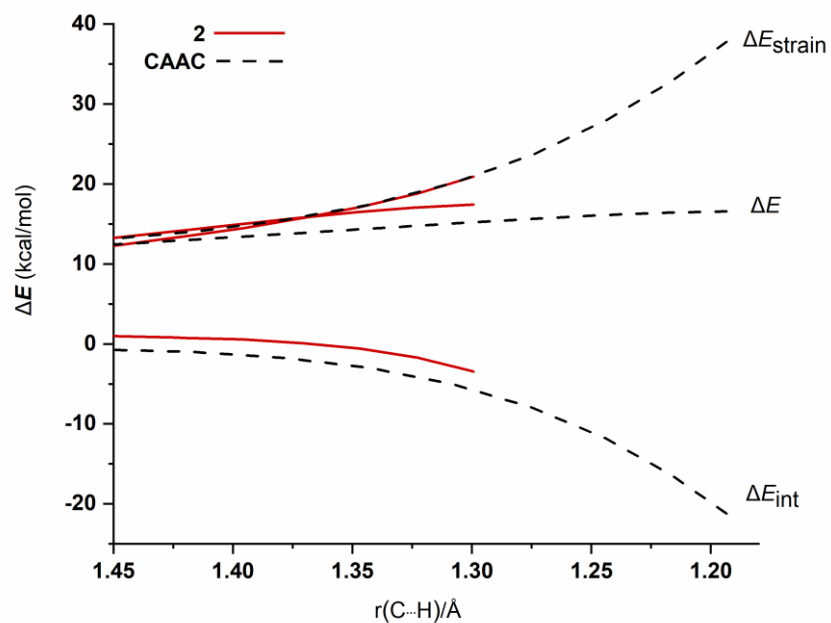

**Fig. S47.** Comparative ASM analyses for the reactions of H<sub>2</sub> with **2** (red) and CAAC (black) projected onto the C···H bond-forming distance.

**Table S12.** ASM analysis of **2** and CAAC.

|                                 | ( <b>2</b> +H <sub>2</sub> ) → TS1 | (CAAC+H <sub>2</sub> ) → TS2 |
|---------------------------------|------------------------------------|------------------------------|
| ΔE <sub>strain</sub> (kcal/mol) | 20.91                              | 37.78                        |
| ΔE <sub>int</sub> (kcal/mol)    | -3.46                              | -21.22                       |
| ΔE (kcal/mol)                   | 17.44                              | 16.56                        |

8.10 NLMOs of TS1 and TS2.

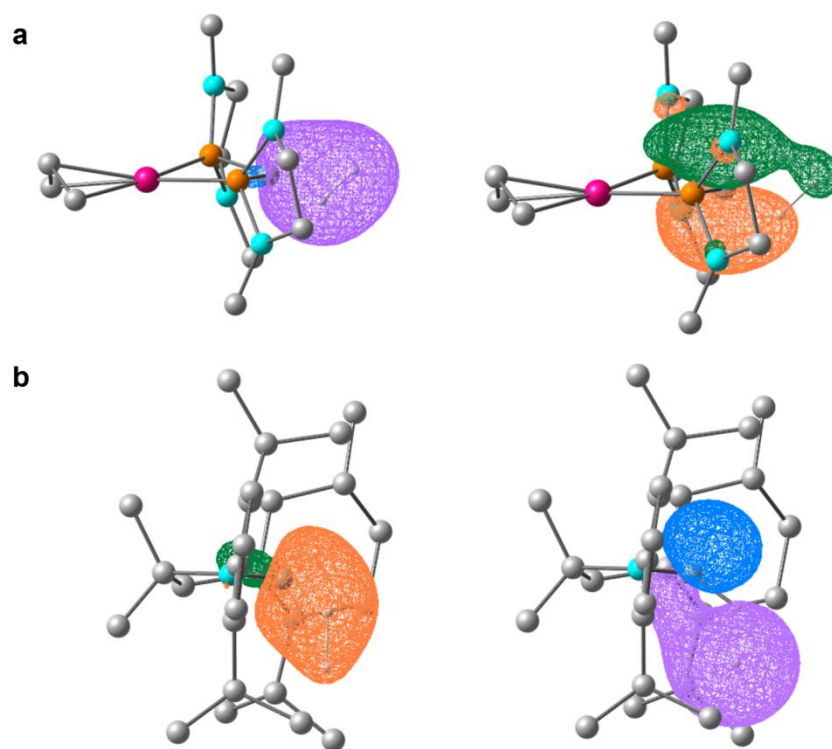

**Fig. S48.** NLMOs analysis. **a**, Selected NLMOs for TS1. **b**, Selected NLMOs for TS2.

## 8.11 2D deformation density and ELF maps.

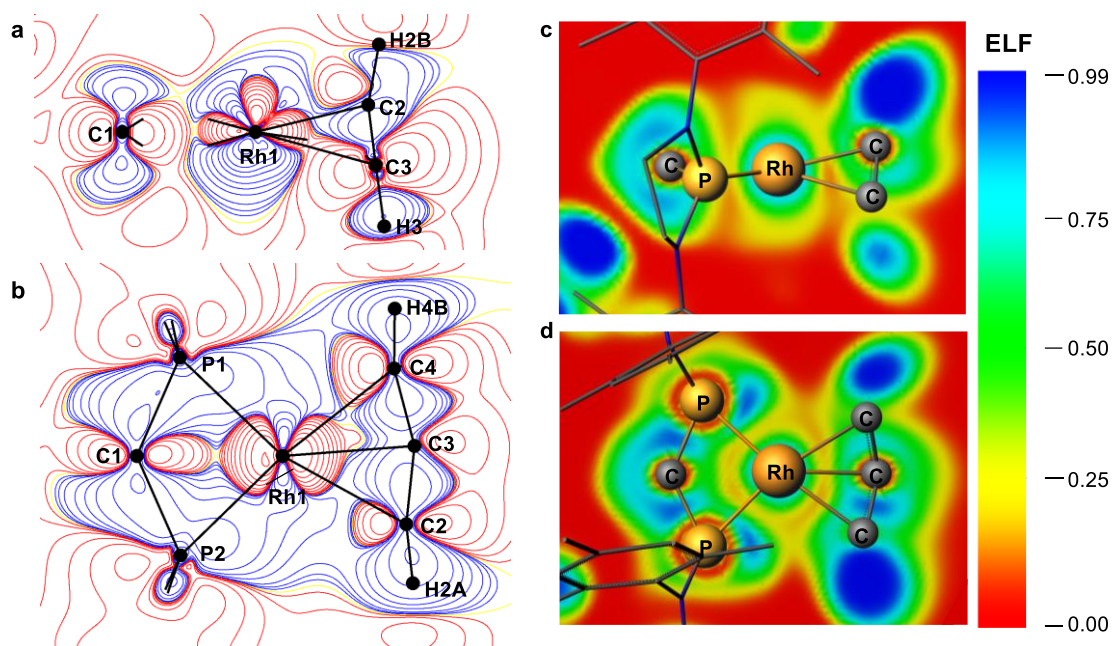

**Fig. S49.** Comparison of 2D deformation density (a, b) and ELF (c, d) maps for **2**. **a** and **b**, Contours are at  $0.05 \text{ e } \text{Å}^{-3}$  level. Blue = positive deformation density (e.g. in bonds or lone pairs), red = negative deformation density. **c** and **d**, Viewed from top and side, respectively.

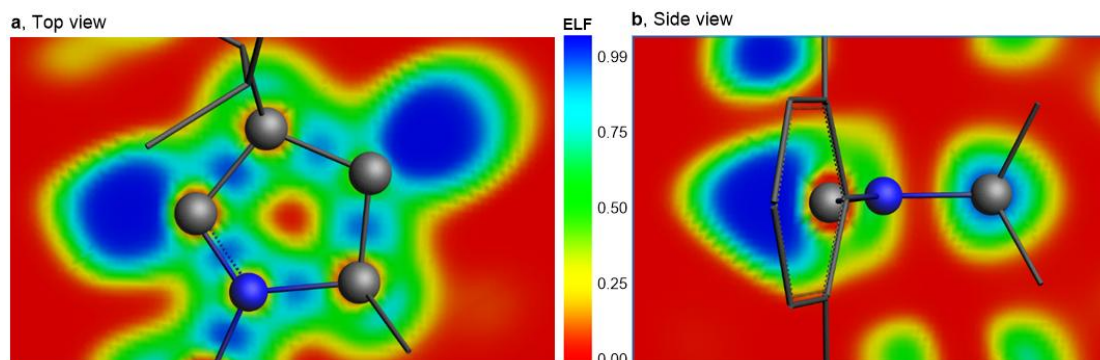

**Fig. S50.** ELF analysis of CAAC, viewed from top and side, respectively.

## Cartesian Coordinates

### 2 (singlet)

|    |              |              |              |
|----|--------------|--------------|--------------|
| 45 | 0.001235000  | -0.644309000 | 1.611425000  |
| 15 | 0.011948000  | -1.516014000 | -0.443304000 |
| 15 | -0.019893000 | 1.384373000  | 0.662568000  |
| 7  | 1.218137000  | 2.563887000  | 0.729906000  |
| 7  | 1.242641000  | -2.316423000 | -1.328068000 |
| 7  | -1.204720000 | -2.404010000 | -1.262452000 |
| 7  | -1.250910000 | 2.588331000  | 0.694072000  |
| 6  | 2.566551000  | 2.386087000  | 0.291029000  |
| 6  | 2.626824000  | -2.114374000 | -1.035412000 |
| 6  | 2.961642000  | 2.988902000  | -0.933790000 |
| 6  | 3.322880000  | -1.094199000 | -1.731444000 |
| 6  | -2.591093000 | -2.147125000 | -1.028252000 |
| 6  | -2.935173000 | 2.648563000  | -1.111924000 |
| 6  | -2.585139000 | 2.347653000  | 0.232701000  |
| 6  | 3.502725000  | 1.658764000  | 1.067273000  |
| 6  | 3.283668000  | -2.915541000 | -0.067248000 |
| 6  | 4.694792000  | -0.924388000 | -1.474437000 |
| 1  | 5.241857000  | -0.146378000 | -2.028526000 |
| 6  | 0.045717000  | 0.193884000  | -0.523904000 |
| 6  | 4.309747000  | 2.915112000  | -1.324821000 |
| 1  | 4.615118000  | 3.391174000  | -2.272126000 |
| 6  | 4.653633000  | -2.696142000 | 0.169347000  |
| 1  | 5.168604000  | -3.315297000 | 0.923538000  |
| 6  | -3.296457000 | -1.206531000 | -1.818748000 |
| 6  | -3.238464000 | -2.842551000 | 0.024212000  |
| 6  | 5.379536000  | -1.713423000 | -0.531063000 |
| 6  | 5.272882000  | 2.247766000  | -0.542368000 |
| 6  | 4.841878000  | 1.610249000  | 0.633457000  |
| 1  | 5.572212000  | 1.057690000  | 1.246512000  |
| 6  | -0.701173000 | -3.122726000 | -2.434783000 |
| 1  | -0.728178000 | -2.495242000 | -3.358454000 |
| 1  | -1.309169000 | -4.032945000 | -2.617343000 |
| 6  | 1.944300000  | 3.680779000  | -1.805720000 |
| 1  | 1.019562000  | 3.075119000  | -1.883260000 |
| 1  | 2.342038000  | 3.850617000  | -2.825238000 |
| 1  | 1.642252000  | 4.671127000  | -1.399800000 |
| 6  | -4.601809000 | -2.591797000 | 0.260235000  |
| 1  | -5.109106000 | -3.134031000 | 1.076052000  |
| 6  | -4.897227000 | 1.756939000  | 0.695095000  |
| 1  | -5.658821000 | 1.390330000  | 1.403074000  |
| 6  | -3.560376000 | 1.846274000  | 1.129819000  |

|   |              |              |              |
|---|--------------|--------------|--------------|
| 6 | -5.288086000 | 2.141141000  | -0.599359000 |
| 6 | -5.335868000 | -1.682456000 | -0.525972000 |
| 6 | 0.751798000  | -3.474652000 | -2.075346000 |
| 1 | 0.784982000  | -4.415642000 | -1.474047000 |
| 1 | 1.369459000  | -3.627971000 | -2.985285000 |
| 6 | -4.284352000 | 2.556359000  | -1.495996000 |
| 1 | -4.557449000 | 2.809997000  | -2.534679000 |
| 6 | 0.722000000  | 3.834352000  | 1.257916000  |
| 1 | 1.345608000  | 4.672305000  | 0.886332000  |
| 1 | 0.766069000  | 3.853692000  | 2.373440000  |
| 6 | -4.664907000 | -1.004307000 | -1.560335000 |
| 1 | -5.216759000 | -0.281036000 | -2.180689000 |
| 6 | -2.467483000 | -3.823309000 | 0.869540000  |
| 1 | -1.919687000 | -4.557495000 | 0.243467000  |
| 1 | -3.134930000 | -4.372496000 | 1.562049000  |
| 1 | -1.699349000 | -3.290421000 | 1.466700000  |
| 6 | -2.590963000 | -0.432435000 | -2.903549000 |
| 1 | -1.623350000 | -0.039262000 | -2.528264000 |
| 1 | -3.208524000 | 0.422362000  | -3.238937000 |
| 1 | -2.376277000 | -1.063735000 | -3.793412000 |
| 6 | -1.881145000 | 3.022143000  | -2.124114000 |
| 1 | -1.540502000 | 4.075385000  | -2.020795000 |
| 1 | -2.265052000 | 2.902761000  | -3.155856000 |
| 1 | -0.988570000 | 2.372967000  | -2.009535000 |
| 6 | -0.734333000 | 3.958435000  | 0.768624000  |
| 1 | -1.345063000 | 4.563587000  | 1.471933000  |
| 1 | -0.762667000 | 4.462437000  | -0.225111000 |
| 6 | 2.597038000  | -0.211188000 | -2.713131000 |
| 1 | 2.066664000  | -0.807204000 | -3.484970000 |
| 1 | 3.293378000  | 0.490125000  | -3.212044000 |
| 1 | 1.820619000  | 0.379804000  | -2.179567000 |
| 6 | 6.719121000  | 2.203729000  | -0.976785000 |
| 1 | 6.839065000  | 1.653358000  | -1.935588000 |
| 1 | 7.356839000  | 1.702825000  | -0.222605000 |
| 1 | 7.123289000  | 3.224594000  | -1.143524000 |
| 6 | 6.845958000  | -1.488602000 | -0.245746000 |
| 1 | 7.356422000  | -0.993104000 | -1.095363000 |
| 1 | 7.373127000  | -2.440823000 | -0.031961000 |
| 1 | 6.984273000  | -0.835482000 | 0.644407000  |
| 6 | 3.075118000  | 0.940483000  | 2.314926000  |
| 1 | 2.475120000  | 1.597810000  | 2.976649000  |
| 1 | 3.945238000  | 0.554501000  | 2.880344000  |
| 1 | 2.407677000  | 0.080607000  | 2.055173000  |
| 6 | -0.055153000 | -0.008008000 | 3.726257000  |

|   |              |              |              |
|---|--------------|--------------|--------------|
| 1 | 0.994846000  | 0.113451000  | 4.039683000  |
| 1 | -0.732585000 | 0.806806000  | 4.023785000  |
| 6 | 0.299665000  | -2.308152000 | 3.000663000  |
| 1 | -0.097613000 | -3.307229000 | 2.760272000  |
| 1 | 1.375502000  | -2.280921000 | 3.247558000  |
| 6 | 2.527998000  | -3.980675000 | 0.688272000  |
| 1 | 1.508297000  | -3.631816000 | 0.945733000  |
| 1 | 3.050238000  | -4.251614000 | 1.626892000  |
| 1 | 2.421111000  | -4.911817000 | 0.089440000  |
| 6 | -3.164894000 | 1.396568000  | 2.509697000  |
| 1 | -2.590645000 | 0.446186000  | 2.437441000  |
| 1 | -4.049633000 | 1.229502000  | 3.154085000  |
| 1 | -2.489983000 | 2.130352000  | 2.994953000  |
| 6 | -6.734516000 | 2.104681000  | -1.032578000 |
| 1 | -7.395026000 | 1.730141000  | -0.226607000 |
| 1 | -6.879126000 | 1.450102000  | -1.918794000 |
| 1 | -7.091660000 | 3.116177000  | -1.321820000 |
| 6 | -0.583183000 | -1.322426000 | 3.537466000  |
| 1 | -1.662143000 | -1.530168000 | 3.653453000  |
| 6 | -6.795062000 | -1.422217000 | -0.236785000 |
| 1 | -7.311404000 | -2.338318000 | 0.115963000  |
| 1 | -7.330541000 | -1.045208000 | -1.130560000 |
| 1 | -6.909765000 | -0.656013000 | 0.561029000  |

## 2 (triplet)

|    |              |              |              |
|----|--------------|--------------|--------------|
| 45 | -0.031965000 | 0.070494000  | 1.887207000  |
| 15 | 0.019971000  | -1.413110000 | 0.179316000  |
| 15 | -0.047081000 | 1.408309000  | 0.068096000  |
| 7  | 1.216477000  | -2.565506000 | -0.289831000 |
| 7  | -1.229023000 | -2.563706000 | -0.136725000 |
| 7  | -1.247421000 | 2.494515000  | -0.528504000 |
| 7  | 1.187707000  | 2.577276000  | -0.257981000 |
| 6  | 0.046684000  | -0.042201000 | -0.970137000 |
| 6  | -3.360572000 | -1.722322000 | -1.069514000 |
| 6  | -2.611649000 | -2.237953000 | 0.018356000  |
| 6  | 2.546821000  | -2.239811000 | -0.693283000 |
| 6  | -3.222019000 | -2.469911000 | 1.277691000  |
| 6  | 3.545867000  | -1.980538000 | 0.278879000  |
| 6  | -4.735440000 | -1.485326000 | -0.881358000 |
| 1  | -5.323279000 | -1.101132000 | -1.729264000 |
| 6  | 2.871835000  | -2.231188000 | -2.076495000 |
| 6  | -2.599793000 | 2.148765000  | -0.814560000 |
| 6  | -0.747550000 | 3.853208000  | -0.755311000 |
| 1  | -0.878604000 | 4.486947000  | 0.155243000  |

|   |              |              |              |
|---|--------------|--------------|--------------|
| 1 | -1.306396000 | 4.338754000  | -1.581263000 |
| 6 | -3.526679000 | 1.892521000  | 0.227797000  |
| 6 | -2.703462000 | -1.428238000 | -2.394378000 |
| 1 | -1.746563000 | -0.879415000 | -2.242183000 |
| 1 | -3.361837000 | -0.804904000 | -3.028866000 |
| 1 | -2.465034000 | -2.357494000 | -2.956712000 |
| 6 | -4.590048000 | -2.181845000 | 1.428275000  |
| 1 | -5.067406000 | -2.362405000 | 2.406379000  |
| 6 | -1.997794000 | 2.226806000  | -3.281514000 |
| 1 | -1.676047000 | 3.278519000  | -3.448056000 |
| 1 | -2.408327000 | 1.855367000  | -4.241015000 |
| 1 | -1.085105000 | 1.645202000  | -3.034079000 |
| 6 | -2.412222000 | -3.054178000 | 2.407250000  |
| 1 | -2.093902000 | -4.093280000 | 2.174581000  |
| 1 | -2.993001000 | -3.076178000 | 3.350413000  |
| 1 | -1.484477000 | -2.470044000 | 2.569656000  |
| 6 | 0.738423000  | 3.691722000  | -1.094071000 |
| 1 | 0.865315000  | 3.483314000  | -2.184026000 |
| 1 | 1.320353000  | 4.605705000  | -0.850537000 |
| 6 | -5.368436000 | -1.702405000 | 0.355672000  |
| 6 | 3.180767000  | -1.869104000 | 1.733360000  |
| 1 | 2.599420000  | -0.934816000 | 1.903579000  |
| 1 | 4.080100000  | -1.848111000 | 2.378858000  |
| 1 | 2.519588000  | -2.700859000 | 2.050639000  |
| 6 | 2.577524000  | 2.258298000  | -0.128161000 |
| 6 | 1.790614000  | -2.376030000 | -3.118825000 |
| 1 | 1.433131000  | -3.424135000 | -3.219771000 |
| 1 | 2.156300000  | -2.057777000 | -4.114796000 |
| 1 | 0.910112000  | -1.754821000 | -2.850300000 |
| 6 | 0.674818000  | -3.914675000 | -0.493421000 |
| 1 | 0.731905000  | -4.513997000 | 0.446537000  |
| 1 | 1.263431000  | -4.448349000 | -1.266878000 |
| 6 | -3.014510000 | 2.101002000  | -2.173675000 |
| 6 | 4.875983000  | -1.813465000 | -0.147952000 |
| 1 | 5.655146000  | -1.644564000 | 0.613563000  |
| 6 | -0.786923000 | -3.719608000 | -0.916317000 |
| 1 | -0.855083000 | -3.545826000 | -2.017410000 |
| 1 | -1.413212000 | -4.602763000 | -0.669587000 |
| 6 | 3.278210000  | 1.637412000  | -1.200934000 |
| 6 | 4.215935000  | -2.059004000 | -2.455662000 |
| 1 | 4.469444000  | -2.067363000 | -3.529532000 |
| 6 | 5.239177000  | -1.874042000 | -1.505600000 |
| 6 | -4.376053000 | 1.900628000  | -2.460770000 |
| 1 | -4.698919000 | 1.875546000  | -3.515688000 |

|   |              |              |              |
|---|--------------|--------------|--------------|
| 6 | 2.577902000  | 1.266519000  | -2.482825000 |
| 1 | 1.649992000  | 0.685821000  | -2.266911000 |
| 1 | 3.232849000  | 0.644229000  | -3.121586000 |
| 1 | 2.275498000  | 2.162072000  | -3.067672000 |
| 6 | -4.878927000 | 1.693122000  | -0.109674000 |
| 1 | -5.603027000 | 1.517141000  | 0.702305000  |
| 6 | -3.074532000 | 1.814162000  | 1.660098000  |
| 1 | -2.485369000 | 0.877363000  | 1.826021000  |
| 1 | -3.933670000 | 1.808524000  | 2.358591000  |
| 1 | -2.391888000 | 2.646944000  | 1.923576000  |
| 6 | -0.003970000 | 1.419314000  | 3.636495000  |
| 1 | -1.066665000 | 1.335900000  | 3.930822000  |
| 1 | 0.396728000  | 2.440824000  | 3.594268000  |
| 6 | 0.336812000  | -1.008162000 | 3.783803000  |
| 1 | -0.695095000 | -1.189954000 | 4.135254000  |
| 1 | 1.012817000  | -1.874700000 | 3.836639000  |
| 6 | -5.331316000 | 1.721928000  | -1.440195000 |
| 6 | -6.837022000 | -1.404060000 | 0.545052000  |
| 1 | -6.984348000 | -0.432351000 | 1.066207000  |
| 1 | -7.335117000 | -2.178916000 | 1.163676000  |
| 1 | -7.369923000 | -1.339976000 | -0.424094000 |
| 6 | 6.674965000  | -1.694959000 | -1.939875000 |
| 1 | 6.873228000  | -0.648347000 | -2.262018000 |
| 1 | 6.927111000  | -2.349626000 | -2.799059000 |
| 1 | 7.381598000  | -1.919521000 | -1.115918000 |
| 6 | 4.649448000  | 1.376408000  | -1.046586000 |
| 1 | 5.190218000  | 0.909882000  | -1.884324000 |
| 6 | 3.254549000  | 2.594570000  | 1.070857000  |
| 6 | 2.558338000  | 3.332899000  | 2.186209000  |
| 1 | 2.968134000  | 4.360601000  | 2.292696000  |
| 1 | 2.706797000  | 2.825550000  | 3.161617000  |
| 1 | 1.474362000  | 3.407573000  | 1.987762000  |
| 6 | -6.791358000 | 1.532039000  | -1.778722000 |
| 1 | -7.172369000 | 2.361426000  | -2.411326000 |
| 1 | -7.418635000 | 1.481931000  | -0.867311000 |
| 1 | -6.957460000 | 0.592960000  | -2.350897000 |
| 6 | 5.342694000  | 1.681930000  | 0.141518000  |
| 6 | 4.624818000  | 2.283311000  | 1.188400000  |
| 1 | 5.150071000  | 2.544557000  | 2.122933000  |
| 6 | 6.809240000  | 1.352919000  | 0.286357000  |
| 1 | 7.367750000  | 1.557322000  | -0.650203000 |
| 1 | 6.954383000  | 0.274952000  | 0.516640000  |
| 1 | 7.281517000  | 1.932920000  | 1.104282000  |
| 6 | 0.861929000  | 0.314963000  | 3.857805000  |

1 1.955900000 0.472977000 3.859987000

**TS1**

45 3.560289000 7.823858000 7.306750000  
15 4.732753000 6.393308000 6.040961000  
15 5.529106000 8.907878000 7.300228000  
7 5.167648000 4.744561000 6.339382000  
7 4.490272000 6.048343000 4.368966000  
7 6.137845000 10.300714000 6.493806000  
7 6.321707000 9.379286000 8.751311000  
6 6.074194000 7.407920000 6.566952000  
1 7.276205000 6.952315000 6.755848000  
1 7.834083000 7.181176000 6.032410000  
6 5.290239000 7.577325000 2.600403000  
6 4.228766000 7.045707000 3.376658000  
6 5.944024000 4.318697000 7.454777000  
6 2.886497000 7.428153000 3.118702000  
6 5.391084000 4.330408000 8.765352000  
6 4.975967000 8.429951000 1.524727000  
1 5.799541000 8.822484000 0.907273000  
6 7.288016000 3.893887000 7.252752000  
6 6.068788000 10.560292000 5.092643000  
6 6.609153000 11.334277000 7.420506000  
1 5.782123000 12.020190000 7.728194000  
1 7.387780000 11.954778000 6.930841000  
6 4.839059000 10.881772000 4.463543000  
6 6.729245000 7.240075000 2.901700000  
1 6.894099000 7.155927000 3.994495000  
1 7.400820000 8.031997000 2.517087000  
1 7.040869000 6.278229000 2.437207000  
6 2.625690000 8.311661000 2.057203000  
1 1.580531000 8.598551000 1.851355000  
6 8.570383000 10.119743000 5.000415000  
1 8.924342000 10.828166000 5.780413000  
1 9.379042000 10.020820000 4.249919000  
1 8.434756000 9.137677000 5.504194000  
6 1.768991000 6.881139000 3.964493000  
1 1.821119000 5.775076000 4.038599000  
1 0.777304000 7.169559000 3.564967000  
1 1.865390000 7.260922000 5.001884000  
6 7.163673000 10.569713000 8.632621000  
1 8.235093000 10.297561000 8.469328000  
1 7.107983000 11.176692000 9.559729000  
6 3.653667000 8.803081000 1.228976000

|   |             |              |              |
|---|-------------|--------------|--------------|
| 6 | 4.005163000 | 4.849914000  | 9.013216000  |
| 1 | 3.985534000 | 5.966138000  | 8.906761000  |
| 1 | 3.651193000 | 4.593678000  | 10.030545000 |
| 1 | 3.284775000 | 4.467815000  | 8.262470000  |
| 6 | 5.994132000 | 8.753544000  | 9.991736000  |
| 6 | 7.924936000 | 3.939931000  | 5.885305000  |
| 1 | 7.653216000 | 3.060024000  | 5.261644000  |
| 1 | 9.029583000 | 3.954417000  | 5.963971000  |
| 1 | 7.603628000 | 4.841135000  | 5.324625000  |
| 6 | 4.802114000 | 3.856932000  | 5.235111000  |
| 1 | 3.757278000 | 3.480761000  | 5.352440000  |
| 1 | 5.471692000 | 2.974659000  | 5.208360000  |
| 6 | 7.282708000 | 10.566093000 | 4.354837000  |
| 6 | 6.181641000 | 3.878938000  | 9.838387000  |
| 1 | 5.739389000 | 3.876757000  | 10.847992000 |
| 6 | 4.926034000 | 4.707449000  | 3.964453000  |
| 1 | 5.977983000 | 4.699308000  | 3.590464000  |
| 1 | 4.271513000 | 4.329933000  | 3.150988000  |
| 6 | 6.643230000 | 7.550025000  | 10.364197000 |
| 6 | 8.038177000 | 3.454219000  | 8.360552000  |
| 1 | 9.081421000 | 3.134235000  | 8.199326000  |
| 6 | 7.504810000 | 3.434923000  | 9.662690000  |
| 6 | 7.257417000 | 10.986823000 | 3.013291000  |
| 1 | 8.203359000 | 11.012713000 | 2.445789000  |
| 6 | 7.753226000 | 6.968446000  | 9.527708000  |
| 1 | 7.347955000 | 6.253554000  | 8.782939000  |
| 1 | 8.473971000 | 6.410423000  | 10.156807000 |
| 1 | 8.295839000 | 7.754984000  | 8.968565000  |
| 6 | 4.865135000 | 11.295370000 | 3.117688000  |
| 1 | 3.913871000 | 11.571615000 | 2.634857000  |
| 6 | 3.538980000 | 10.790960000 | 5.216792000  |
| 1 | 3.325546000 | 9.732515000  | 5.505836000  |
| 1 | 2.695124000 | 11.169990000 | 4.608673000  |
| 1 | 3.576072000 | 11.358071000 | 6.170635000  |
| 6 | 1.547211000 | 6.926592000  | 7.571696000  |
| 1 | 1.666686000 | 6.419647000  | 8.544258000  |
| 1 | 1.065851000 | 6.328561000  | 6.782848000  |
| 6 | 2.210151000 | 9.122154000  | 8.464662000  |
| 1 | 2.371850000 | 8.744988000  | 9.489883000  |
| 1 | 2.236064000 | 10.216170000 | 8.348469000  |
| 6 | 6.061756000 | 11.386194000 | 2.384536000  |
| 6 | 3.333453000 | 9.726266000  | 0.077445000  |
| 1 | 3.110019000 | 10.755047000 | 0.435970000  |
| 1 | 2.439900000 | 9.381183000  | -0.482933000 |

|   |             |              |              |
|---|-------------|--------------|--------------|
| 1 | 4.178482000 | 9.802736000  | -0.634701000 |
| 6 | 8.343170000 | 3.012755000  | 10.846332000 |
| 1 | 8.830514000 | 3.892796000  | 11.322966000 |
| 1 | 9.151007000 | 2.313230000  | 10.551203000 |
| 1 | 7.728314000 | 2.521383000  | 11.627808000 |
| 6 | 6.230758000 | 6.901063000  | 11.544741000 |
| 1 | 6.737962000 | 5.967937000  | 11.838408000 |
| 6 | 4.990688000 | 9.322995000  | 10.821424000 |
| 6 | 4.375959000 | 10.655426000 | 10.473536000 |
| 1 | 5.023547000 | 11.495486000 | 10.809439000 |
| 1 | 3.389589000 | 10.786462000 | 10.959369000 |
| 1 | 4.246434000 | 10.758679000 | 9.379283000  |
| 6 | 6.076598000 | 11.877191000 | 0.956194000  |
| 1 | 6.859659000 | 12.648905000 | 0.802510000  |
| 1 | 5.102351000 | 12.315109000 | 0.663771000  |
| 1 | 6.296430000 | 11.051992000 | 0.244175000  |
| 6 | 5.199408000 | 7.409970000  | 12.354074000 |
| 6 | 4.603575000 | 8.633196000  | 11.983814000 |
| 1 | 3.810831000 | 9.063024000  | 12.619331000 |
| 6 | 4.728181000 | 6.659252000  | 13.578102000 |
| 1 | 5.494725000 | 5.944480000  | 13.939290000 |
| 1 | 3.809522000 | 6.072893000  | 13.354810000 |
| 1 | 4.477027000 | 7.347235000  | 14.411408000 |
| 6 | 1.471504000 | 8.345568000  | 7.526988000  |
| 1 | 1.019450000 | 8.840731000  | 6.647605000  |

### 3a

|    |              |              |              |
|----|--------------|--------------|--------------|
| 45 | 0.164379000  | -0.802329000 | 1.592735000  |
| 15 | 0.162677000  | -1.095357000 | -0.633305000 |
| 15 | -0.039460000 | 1.235275000  | 0.718038000  |
| 7  | 1.107479000  | 2.513302000  | 1.011443000  |
| 7  | 1.349656000  | -1.844091000 | -1.666775000 |
| 7  | -1.112478000 | -1.803680000 | -1.567643000 |
| 7  | -1.359217000 | 2.354373000  | 0.892729000  |
| 6  | 2.413351000  | 2.559652000  | 0.448773000  |
| 6  | 2.698400000  | -1.984323000 | -1.212531000 |
| 6  | 2.696501000  | 3.481321000  | -0.601362000 |
| 6  | 3.673557000  | -1.046047000 | -1.636680000 |
| 6  | -2.499146000 | -1.783609000 | -1.226095000 |
| 6  | -3.225415000 | 2.697485000  | -0.688419000 |
| 6  | -2.700372000 | 2.078504000  | 0.481332000  |
| 6  | 3.427288000  | 1.669296000  | 0.900309000  |
| 6  | 3.056047000  | -3.038904000 | -0.325865000 |
| 6  | 4.987300000  | -1.159770000 | -1.138465000 |

|   |              |              |              |
|---|--------------|--------------|--------------|
| 1 | 5.746143000  | -0.436674000 | -1.479119000 |
| 6 | 0.221687000  | 0.747845000  | -1.061789000 |
| 6 | 3.991494000  | 3.519523000  | -1.150525000 |
| 1 | 4.199605000  | 4.230842000  | -1.967649000 |
| 6 | 4.371339000  | -3.094880000 | 0.165989000  |
| 1 | 4.640953000  | -3.901230000 | 0.869081000  |
| 6 | -3.417354000 | -0.972663000 | -1.943208000 |
| 6 | -2.968244000 | -2.653199000 | -0.202311000 |
| 6 | 5.351792000  | -2.157058000 | -0.219006000 |
| 6 | 5.013825000  | 2.656663000  | -0.708011000 |
| 6 | 4.705599000  | 1.742512000  | 0.314063000  |
| 1 | 5.485548000  | 1.055756000  | 0.678708000  |
| 6 | -0.643239000 | -2.184353000 | -2.904299000 |
| 1 | -0.605376000 | -1.319799000 | -3.611410000 |
| 1 | -1.320913000 | -2.950317000 | -3.333744000 |
| 6 | 1.616169000  | 4.377413000  | -1.153018000 |
| 1 | 0.659593000  | 3.824958000  | -1.248206000 |
| 1 | 1.895718000  | 4.772909000  | -2.148918000 |
| 1 | 1.412252000  | 5.251761000  | -0.497356000 |
| 6 | -4.341359000 | -2.674663000 | 0.096123000  |
| 1 | -4.696952000 | -3.352066000 | 0.890923000  |
| 6 | -4.891138000 | 1.109074000  | 0.920727000  |
| 1 | -5.535778000 | 0.476537000  | 1.552460000  |
| 6 | -3.534938000 | 1.240179000  | 1.271831000  |
| 6 | -5.451050000 | 1.775819000  | -0.183029000 |
| 6 | -5.274652000 | -1.898869000 | -0.617889000 |
| 6 | 0.773361000  | -2.728341000 | -2.680598000 |
| 1 | 0.731921000  | -3.792580000 | -2.344272000 |
| 1 | 1.373091000  | -2.689368000 | -3.616363000 |
| 6 | -4.591847000 | 2.544949000  | -0.988378000 |
| 1 | -4.995129000 | 3.046750000  | -1.884873000 |
| 6 | 0.488540000  | 3.610074000  | 1.754176000  |
| 1 | 1.059674000  | 4.547692000  | 1.603447000  |
| 1 | 0.481677000  | 3.396690000  | 2.850377000  |
| 6 | -4.788762000 | -1.063795000 | -1.637126000 |
| 1 | -5.496001000 | -0.442356000 | -2.209392000 |
| 6 | -2.014830000 | -3.563023000 | 0.521244000  |
| 1 | -1.403557000 | -4.150739000 | -0.195429000 |
| 1 | -2.552128000 | -4.261308000 | 1.192130000  |
| 1 | -1.295512000 | -2.964710000 | 1.121580000  |
| 6 | -2.966634000 | -0.031257000 | -3.033069000 |
| 1 | -2.001580000 | 0.446530000  | -2.778565000 |
| 1 | -3.713424000 | 0.771666000  | -3.185441000 |
| 1 | -2.825247000 | -0.551392000 | -4.005758000 |

|   |              |              |              |
|---|--------------|--------------|--------------|
| 6 | -2.354066000 | 3.510261000  | -1.615781000 |
| 1 | -2.310423000 | 4.582760000  | -1.323641000 |
| 1 | -2.741744000 | 3.471871000  | -2.653196000 |
| 1 | -1.311592000 | 3.135522000  | -1.621823000 |
| 6 | -0.949842000 | 3.725744000  | 1.222545000  |
| 1 | -1.634105000 | 4.146807000  | 1.990262000  |
| 1 | -0.976252000 | 4.402752000  | 0.338078000  |
| 6 | 3.338663000  | 0.064413000  | -2.600528000 |
| 1 | 2.381599000  | -0.130253000 | -3.119746000 |
| 1 | 4.142202000  | 0.190832000  | -3.354581000 |
| 1 | 3.251120000  | 1.036052000  | -2.067880000 |
| 6 | 6.378102000  | 2.669623000  | -1.355968000 |
| 1 | 6.368988000  | 2.099926000  | -2.312050000 |
| 1 | 7.143469000  | 2.203582000  | -0.703588000 |
| 1 | 6.710901000  | 3.699785000  | -1.598265000 |
| 6 | 6.746062000  | -2.210728000 | 0.361084000  |
| 1 | 7.472307000  | -1.658612000 | -0.268733000 |
| 1 | 7.106581000  | -3.254268000 | 0.470473000  |
| 1 | 6.772919000  | -1.752792000 | 1.374818000  |
| 6 | 3.149198000  | 0.659837000  | 1.974004000  |
| 1 | 2.710908000  | 1.140142000  | 2.872764000  |
| 1 | 4.064787000  | 0.107536000  | 2.259894000  |
| 1 | 2.379466000  | -0.091389000 | 1.635516000  |
| 6 | 0.208776000  | -0.450122000 | 3.777952000  |
| 1 | 1.263477000  | -0.167210000 | 3.934693000  |
| 1 | -0.530176000 | 0.199767000  | 4.270838000  |
| 6 | 0.707960000  | -2.649188000 | 2.737046000  |
| 1 | 0.361496000  | -3.662065000 | 2.483990000  |
| 1 | 1.804040000  | -2.511303000 | 2.744905000  |
| 6 | 2.053907000  | -4.100447000 | 0.052296000  |
| 1 | 1.046660000  | -3.667475000 | 0.201525000  |
| 1 | 2.350723000  | -4.616743000 | 0.985566000  |
| 1 | 1.974604000  | -4.874292000 | -0.742581000 |
| 6 | -2.986048000 | 0.515164000  | 2.466125000  |
| 1 | -2.270946000 | -0.279563000 | 2.136369000  |
| 1 | -3.792425000 | 0.050250000  | 3.065524000  |
| 1 | -2.390793000 | 1.195447000  | 3.109036000  |
| 6 | -6.919655000 | 1.659957000  | -0.515439000 |
| 1 | -7.484678000 | 1.163927000  | 0.297848000  |
| 1 | -7.081725000 | 1.065684000  | -1.441062000 |
| 1 | -7.375193000 | 2.657023000  | -0.690851000 |
| 6 | -0.125878000 | -1.808623000 | 3.519554000  |
| 1 | -1.167170000 | -2.135378000 | 3.702141000  |
| 6 | -6.744486000 | -1.954455000 | -0.276273000 |

|   |              |              |              |
|---|--------------|--------------|--------------|
| 1 | -7.076004000 | -2.993394000 | -0.070791000 |
| 1 | -7.372016000 | -1.547804000 | -1.093929000 |
| 1 | -6.967136000 | -1.359383000 | 0.636685000  |
| 1 | 1.235505000  | 1.052424000  | -1.396506000 |
| 1 | -0.527121000 | 1.115029000  | -1.793338000 |

**CAAC (singlet)**

|   |              |              |              |
|---|--------------|--------------|--------------|
| 7 | 0.507477000  | -0.030094000 | 0.454187000  |
| 6 | -0.555208000 | 0.077912000  | -0.318863000 |
| 6 | -1.760370000 | 0.122612000  | 0.612244000  |
| 6 | -1.238191000 | -0.235795000 | 2.042334000  |
| 1 | -1.643561000 | 0.456527000  | 2.807083000  |
| 1 | -1.556093000 | -1.255271000 | 2.335874000  |
| 6 | 0.303013000  | -0.160412000 | 1.983466000  |
| 6 | -2.245934000 | 1.607704000  | 0.613116000  |
| 1 | -3.015749000 | 1.701715000  | 1.414801000  |
| 1 | -1.403091000 | 2.266941000  | 0.916516000  |
| 6 | -2.845466000 | 2.102493000  | -0.709754000 |
| 1 | -2.054271000 | 2.013971000  | -1.486500000 |
| 6 | -4.001208000 | 1.174604000  | -1.113629000 |
| 1 | -4.423058000 | 1.492535000  | -2.092286000 |
| 1 | -4.825634000 | 1.276938000  | -0.368237000 |
| 6 | -3.537505000 | -0.283682000 | -1.184620000 |
| 1 | -4.382958000 | -0.939375000 | -1.485258000 |
| 1 | -2.763511000 | -0.368793000 | -1.975096000 |
| 6 | -2.941757000 | -0.787970000 | 0.144638000  |
| 1 | -3.726764000 | -0.664192000 | 0.929693000  |
| 6 | 1.854181000  | 0.076081000  | -0.066585000 |
| 6 | 2.580728000  | -1.095126000 | -0.398680000 |
| 6 | 3.929333000  | -0.951828000 | -0.785383000 |
| 1 | 4.512935000  | -1.849622000 | -1.042194000 |
| 6 | 4.528566000  | 0.310695000  | -0.871502000 |
| 1 | 5.586504000  | 0.401571000  | -1.164049000 |
| 6 | 3.765841000  | 1.461519000  | -0.627063000 |
| 1 | 4.223851000  | 2.453664000  | -0.756753000 |
| 6 | 2.416130000  | 1.371131000  | -0.235008000 |
| 6 | 0.980276000  | -1.431123000 | 2.510062000  |
| 1 | 2.075822000  | -1.407569000 | 2.339919000  |
| 1 | 0.568114000  | -2.340269000 | 2.030554000  |
| 1 | 0.808255000  | -1.515348000 | 3.602830000  |
| 6 | 0.878423000  | 1.060468000  | 2.718791000  |
| 1 | 1.956708000  | 1.193759000  | 2.496669000  |
| 1 | 0.772944000  | 0.914235000  | 3.813266000  |
| 1 | 0.346589000  | 1.993958000  | 2.452409000  |

|   |              |              |              |
|---|--------------|--------------|--------------|
| 6 | -3.278011000 | 3.568911000  | -0.609276000 |
| 1 | -4.058066000 | 3.703930000  | 0.172184000  |
| 1 | -3.700604000 | 3.932509000  | -1.569375000 |
| 1 | -2.423131000 | 4.227177000  | -0.345420000 |
| 6 | -2.591980000 | -2.303453000 | 0.095589000  |
| 1 | -1.934079000 | -2.514785000 | 0.968592000  |
| 6 | -1.807271000 | -2.702994000 | -1.163526000 |
| 1 | -2.460519000 | -2.726634000 | -2.060815000 |
| 1 | -1.362817000 | -3.713665000 | -1.050293000 |
| 1 | -0.993436000 | -1.974865000 | -1.367114000 |
| 6 | -3.845936000 | -3.175496000 | 0.270771000  |
| 1 | -3.588305000 | -4.255438000 | 0.257340000  |
| 1 | -4.575462000 | -3.002363000 | -0.549336000 |
| 1 | -4.362681000 | -2.960962000 | 1.229987000  |
| 6 | 1.906744000  | -2.457971000 | -0.512170000 |
| 1 | 0.911495000  | -2.384186000 | -0.032616000 |
| 6 | 1.661145000  | -2.761045000 | -2.005784000 |
| 1 | 1.101473000  | -3.711455000 | -2.129444000 |
| 1 | 2.622455000  | -2.852915000 | -2.554228000 |
| 1 | 1.075394000  | -1.947479000 | -2.478613000 |
| 6 | 2.685661000  | -3.594861000 | 0.168952000  |
| 1 | 2.877940000  | -3.379183000 | 1.239417000  |
| 1 | 3.666954000  | -3.771817000 | -0.319483000 |
| 1 | 2.115323000  | -4.545042000 | 0.107725000  |
| 6 | 1.554771000  | 2.626895000  | -0.149260000 |
| 1 | 0.688271000  | 2.397738000  | 0.498289000  |
| 6 | 2.275795000  | 3.839709000  | 0.456621000  |
| 1 | 1.566316000  | 4.683652000  | 0.582597000  |
| 1 | 3.098237000  | 4.204843000  | -0.193883000 |
| 1 | 2.709739000  | 3.604520000  | 1.450576000  |
| 6 | 0.980492000  | 2.932635000  | -1.549280000 |
| 1 | 1.794609000  | 3.152901000  | -2.271928000 |
| 1 | 0.302059000  | 3.811354000  | -1.512101000 |
| 1 | 0.405890000  | 2.057774000  | -1.917807000 |

## TS2

|   |              |              |              |
|---|--------------|--------------|--------------|
| 7 | 0.555128000  | -0.151843000 | 0.427493000  |
| 6 | -0.513111000 | 0.057392000  | -0.357455000 |
| 6 | -1.759556000 | 0.152221000  | 0.510865000  |
| 6 | -1.293593000 | -0.444611000 | 1.871220000  |
| 1 | -1.738927000 | 0.088062000  | 2.735532000  |
| 1 | -1.602172000 | -1.503455000 | 1.942226000  |
| 6 | 0.255304000  | -0.380213000 | 1.896478000  |
| 6 | -2.061451000 | 1.676642000  | 0.669368000  |

|   |              |              |              |
|---|--------------|--------------|--------------|
| 1 | -2.905653000 | 1.782070000  | 1.389825000  |
| 1 | -1.191628000 | 2.187993000  | 1.133904000  |
| 6 | -2.419881000 | 2.367201000  | -0.654067000 |
| 1 | -1.542343000 | 2.245372000  | -1.328067000 |
| 6 | -3.609521000 | 1.645763000  | -1.305759000 |
| 1 | -3.822189000 | 2.088044000  | -2.303626000 |
| 1 | -4.517622000 | 1.828850000  | -0.683598000 |
| 6 | -3.386035000 | 0.132656000  | -1.432286000 |
| 1 | -4.299262000 | -0.334242000 | -1.852882000 |
| 1 | -2.570289000 | -0.082393000 | -2.157531000 |
| 6 | -3.046282000 | -0.516922000 | -0.076036000 |
| 1 | -3.860440000 | -0.201463000 | 0.619621000  |
| 6 | 1.904002000  | -0.040501000 | -0.067676000 |
| 6 | 2.612608000  | -1.209774000 | -0.454684000 |
| 6 | 3.966505000  | -1.072809000 | -0.825350000 |
| 1 | 4.534630000  | -1.969126000 | -1.119823000 |
| 6 | 4.589992000  | 0.180340000  | -0.853092000 |
| 1 | 5.650343000  | 0.264052000  | -1.139121000 |
| 6 | 3.848830000  | 1.332660000  | -0.557066000 |
| 1 | 4.326570000  | 2.321550000  | -0.635742000 |
| 6 | 2.496302000  | 1.249524000  | -0.174002000 |
| 6 | 0.870030000  | -1.690502000 | 2.404574000  |
| 1 | 1.975745000  | -1.672692000 | 2.325027000  |
| 1 | 0.486861000  | -2.562629000 | 1.841363000  |
| 1 | 0.608910000  | -1.832090000 | 3.473443000  |
| 6 | 1.933597000  | -2.568237000 | -0.607073000 |
| 1 | 0.896273000  | -2.472112000 | -0.224319000 |
| 6 | 1.810874000  | -2.923664000 | -2.104166000 |
| 1 | 1.274816000  | -3.887973000 | -2.226632000 |
| 1 | 2.810052000  | -3.021238000 | -2.580112000 |
| 1 | 1.230780000  | -2.149756000 | -2.644197000 |
| 6 | 2.654525000  | -3.693685000 | 0.156938000  |
| 1 | 2.783789000  | -3.455405000 | 1.231253000  |
| 1 | 3.662957000  | -3.888750000 | -0.265309000 |
| 1 | 2.080712000  | -4.640740000 | 0.081935000  |
| 6 | 1.680608000  | 2.526047000  | -0.004392000 |
| 1 | 0.729347000  | 2.250381000  | 0.486565000  |
| 6 | 2.369937000  | 3.585565000  | 0.870200000  |
| 1 | 1.696574000  | 4.453774000  | 1.027741000  |
| 1 | 3.296985000  | 3.974047000  | 0.398601000  |
| 1 | 2.643663000  | 3.178892000  | 1.865072000  |
| 6 | 1.313947000  | 3.087607000  | -1.394018000 |
| 1 | 2.222916000  | 3.391599000  | -1.955239000 |
| 1 | 0.655306000  | 3.976346000  | -1.298195000 |

|   |              |              |              |
|---|--------------|--------------|--------------|
| 1 | 0.780378000  | 2.323367000  | -1.994159000 |
| 1 | -0.538133000 | -0.421160000 | -1.450403000 |
| 1 | -0.805386000 | -1.524296000 | -1.611873000 |
| 6 | -3.036118000 | -2.086085000 | -0.054529000 |
| 6 | -3.479433000 | -2.756589000 | -1.363446000 |
| 6 | -3.884793000 | -2.617437000 | 1.115088000  |
| 1 | -1.979558000 | -2.402801000 | 0.095649000  |
| 1 | -2.821104000 | -2.458290000 | -2.203701000 |
| 1 | -3.415159000 | -3.860638000 | -1.263270000 |
| 1 | -4.530407000 | -2.511467000 | -1.626478000 |
| 1 | -3.580641000 | -2.182795000 | 2.090306000  |
| 1 | -4.957582000 | -2.364075000 | 0.966719000  |
| 1 | -3.812481000 | -3.722413000 | 1.200622000  |
| 6 | -2.677882000 | 3.864422000  | -0.458020000 |
| 1 | -2.912283000 | 4.364108000  | -1.421280000 |
| 1 | -3.537290000 | 4.037153000  | 0.226330000  |
| 1 | -1.793930000 | 4.373976000  | -0.018832000 |
| 6 | 0.804280000  | 0.782643000  | 2.743176000  |
| 1 | 0.614107000  | 0.581439000  | 3.816592000  |
| 1 | 1.899529000  | 0.888776000  | 2.605194000  |
| 1 | 0.325234000  | 1.747117000  | 2.489677000  |

### CAAC-H<sub>2</sub>

|   |              |              |              |
|---|--------------|--------------|--------------|
| 7 | 0.600207000  | -0.048311000 | 0.480516000  |
| 6 | -0.562942000 | -0.219667000 | -0.372198000 |
| 6 | -1.743999000 | 0.246010000  | 0.508876000  |
| 6 | -1.276861000 | -0.221255000 | 1.913448000  |
| 1 | -1.697985000 | 0.422191000  | 2.712903000  |
| 1 | -1.633044000 | -1.251409000 | 2.114450000  |
| 6 | 0.283179000  | -0.209816000 | 1.925768000  |
| 6 | -1.844879000 | 1.793322000  | 0.508088000  |
| 1 | -2.527257000 | 2.097249000  | 1.335351000  |
| 1 | -0.850326000 | 2.218867000  | 0.753933000  |
| 6 | -2.362513000 | 2.414249000  | -0.796887000 |
| 1 | -1.652981000 | 2.142255000  | -1.613545000 |
| 6 | -3.726838000 | 1.800443000  | -1.144323000 |
| 1 | -4.102495000 | 2.209429000  | -2.107842000 |
| 1 | -4.465007000 | 2.103238000  | -0.364973000 |
| 6 | -3.646027000 | 0.271684000  | -1.209570000 |
| 1 | -4.645186000 | -0.151479000 | -1.450070000 |
| 1 | -2.980231000 | -0.015841000 | -2.052834000 |
| 6 | -3.123983000 | -0.356685000 | 0.098964000  |
| 1 | -3.819420000 | -0.020678000 | 0.904128000  |
| 6 | 1.919949000  | -0.140138000 | -0.052074000 |

|   |              |              |              |
|---|--------------|--------------|--------------|
| 6 | 2.477203000  | -1.388682000 | -0.464691000 |
| 6 | 3.799826000  | -1.423958000 | -0.950920000 |
| 1 | 4.234126000  | -2.386720000 | -1.264792000 |
| 6 | 4.569446000  | -0.257846000 | -1.048928000 |
| 1 | 5.605658000  | -0.307541000 | -1.419713000 |
| 6 | 4.002310000  | 0.975275000  | -0.702101000 |
| 1 | 4.591422000  | 1.898163000  | -0.825557000 |
| 6 | 2.680778000  | 1.057641000  | -0.221858000 |
| 6 | 0.830167000  | -1.522547000 | 2.530064000  |
| 1 | 1.933702000  | -1.574726000 | 2.425947000  |
| 1 | 0.392440000  | -2.413998000 | 2.039522000  |
| 1 | 0.587304000  | -1.581412000 | 3.611541000  |
| 6 | 1.652056000  | -2.672433000 | -0.483390000 |
| 1 | 0.718168000  | -2.469117000 | 0.073442000  |
| 6 | 1.255189000  | -3.027491000 | -1.931784000 |
| 1 | 0.588294000  | -3.915239000 | -1.954401000 |
| 1 | 2.151488000  | -3.257940000 | -2.546046000 |
| 1 | 0.724908000  | -2.185327000 | -2.421260000 |
| 6 | 2.355052000  | -3.855762000 | 0.203757000  |
| 1 | 2.646870000  | -3.606062000 | 1.243658000  |
| 1 | 3.274106000  | -4.160921000 | -0.339305000 |
| 1 | 1.685415000  | -4.740735000 | 0.237575000  |
| 6 | 2.042833000  | 2.425126000  | -0.011265000 |
| 1 | 1.093236000  | 2.240321000  | 0.524347000  |
| 6 | 2.898648000  | 3.382873000  | 0.831534000  |
| 1 | 2.350138000  | 4.328692000  | 1.024767000  |
| 1 | 3.846406000  | 3.653925000  | 0.319222000  |
| 1 | 3.163401000  | 2.935272000  | 1.811192000  |
| 6 | 1.675995000  | 3.047882000  | -1.374133000 |
| 1 | 2.582372000  | 3.241767000  | -1.986765000 |
| 1 | 1.142510000  | 4.012756000  | -1.238535000 |
| 1 | 1.017433000  | 2.371648000  | -1.956743000 |
| 1 | -0.453171000 | 0.384614000  | -1.299274000 |
| 1 | -0.724463000 | -1.275048000 | -0.702507000 |
| 6 | -3.199434000 | -1.920782000 | 0.080939000  |
| 6 | -3.012973000 | -2.577435000 | -1.299943000 |
| 6 | -4.521501000 | -2.395470000 | 0.708580000  |
| 1 | -2.378017000 | -2.303011000 | 0.726998000  |
| 1 | -2.078309000 | -2.257462000 | -1.802653000 |
| 1 | -2.968624000 | -3.681462000 | -1.192564000 |
| 1 | -3.856793000 | -2.349381000 | -1.983638000 |
| 1 | -4.621199000 | -2.045097000 | 1.757143000  |
| 1 | -5.393472000 | -2.003006000 | 0.140843000  |
| 1 | -4.599199000 | -3.503177000 | 0.710283000  |

|   |              |             |              |
|---|--------------|-------------|--------------|
| 6 | -2.410383000 | 3.943447000 | -0.708356000 |
| 1 | -2.764174000 | 4.395322000 | -1.658706000 |
| 1 | -3.101555000 | 4.272605000 | 0.097913000  |
| 1 | -1.408593000 | 4.365717000 | -0.483038000 |
| 6 | 0.853160000  | 0.956927000 | 2.761219000  |
| 1 | 0.639987000  | 0.802729000 | 3.839082000  |
| 1 | 1.954133000  | 1.019608000 | 2.640733000  |
| 1 | 0.415801000  | 1.929122000 | 2.463283000  |

A (singlet)

|    |              |              |              |
|----|--------------|--------------|--------------|
| 45 | 0.000002000  | 0.409309000  | -0.000887000 |
| 15 | -1.162394000 | -1.280136000 | -1.027841000 |
| 15 | 1.164102000  | -1.277633000 | 1.027921000  |
| 7  | -2.768321000 | -1.745039000 | -0.815409000 |
| 7  | 1.209367000  | -1.456291000 | 2.705503000  |
| 7  | 2.770208000  | -1.742345000 | 0.816169000  |
| 7  | -1.207687000 | -1.460630000 | -2.705247000 |
| 7  | -2.134725000 | 2.478560000  | -0.962972000 |
| 7  | 2.133952000  | 2.481190000  | 0.957073000  |
| 6  | -1.284387000 | 1.730130000  | -0.619451000 |
| 6  | 1.283598000  | 1.731949000  | 0.615365000  |
| 6  | 3.299111000  | -2.275053000 | -0.404202000 |
| 6  | 0.001224000  | -1.937971000 | 0.000339000  |
| 6  | 3.349606000  | -3.684259000 | -0.560317000 |
| 6  | 2.752394000  | -4.592508000 | 0.486524000  |
| 1  | 3.345121000  | -4.599697000 | 1.426686000  |
| 1  | 2.701579000  | -5.637284000 | 0.124320000  |
| 1  | 1.724838000  | -4.269912000 | 0.757004000  |
| 6  | -0.040730000 | -1.360897000 | -3.535404000 |
| 6  | 4.472541000  | -3.373059000 | -2.726066000 |
| 6  | 0.777452000  | -2.504260000 | -3.721903000 |
| 6  | -3.297501000 | -2.275309000 | 0.405915000  |
| 6  | 3.760800000  | -1.408744000 | -1.423553000 |
| 6  | 4.352181000  | -1.980678000 | -2.564927000 |
| 1  | 4.725973000  | -1.312220000 | -3.356643000 |
| 6  | -3.228800000 | 3.259915000  | -1.445066000 |
| 6  | -3.346314000 | -3.684163000 | 0.565467000  |
| 6  | 0.042594000  | -1.352984000 | 3.535357000  |
| 6  | -3.939443000 | -4.206457000 | 1.728275000  |
| 1  | -3.985143000 | -5.300684000 | 1.856871000  |
| 6  | -2.467012000 | -2.047286000 | -3.190034000 |
| 1  | -2.357916000 | -3.143216000 | -3.361634000 |
| 1  | -2.754875000 | -1.577287000 | -4.152338000 |
| 6  | 5.152045000  | -3.960981000 | -3.939424000 |

1 5.195879000 -3.236226000 -4.775782000  
1 4.634105000 -4.874748000 -4.296688000  
1 6.197640000 -4.256636000 -3.704066000  
6 0.510153000 -3.782360000 -2.966360000  
1 -0.495875000 -4.200453000 -3.181405000  
1 0.568066000 -3.600002000 -1.871406000  
1 1.261355000 -4.554113000 -3.218499000  
6 2.468555000 -2.042438000 3.191122000  
1 2.359596000 -3.138234000 3.363611000  
1 2.756144000 -1.571495000 4.153042000  
6 2.176745000 -1.208428000 -5.276790000  
6 1.369243000 -0.080645000 -5.035686000  
1 1.601636000 0.868726000 -5.546248000  
6 3.942494000 -4.208650000 -1.722303000  
1 3.989511000 -5.303130000 -1.848245000  
6 -3.506246000 -1.756335000 -2.087817000  
1 -4.003331000 -0.774629000 -2.264060000  
1 -4.295606000 -2.533030000 -2.053166000  
6 1.863193000 -2.408012000 -4.608824000  
1 2.485898000 -3.299478000 -4.778191000  
6 0.253826000 -0.133638000 -4.177922000  
6 3.507895000 -1.752292000 2.088765000  
1 4.004660000 -0.770268000 2.264117000  
1 4.297485000 -2.528772000 2.054971000  
6 -0.776792000 -2.495191000 3.724484000  
6 3.367124000 -1.124768000 -6.201973000  
1 3.610514000 -2.110799000 -6.645139000  
1 4.272440000 -0.777365000 -5.656204000  
1 3.194977000 -0.406741000 -7.028617000  
6 -0.509333000 -3.775790000 2.973247000  
1 0.494970000 -4.195392000 3.193483000  
1 -0.562593000 -3.596373000 1.877587000  
1 -1.263128000 -4.545283000 3.224537000  
6 -2.746985000 -4.594026000 -0.478738000  
1 -3.336655000 -4.601060000 -1.420793000  
1 -2.698578000 -5.638580000 -0.115579000  
1 -1.718142000 -4.272874000 -0.746111000  
6 -4.471400000 -3.369058000 2.729528000  
6 -3.761364000 -1.407059000 1.422592000  
6 3.228033000 3.263569000 1.437544000  
6 -4.202887000 2.333171000 -2.220716000  
1 -4.555672000 1.529142000 -1.539475000  
1 -3.652768000 1.849378000 -3.055930000  
6 3.578089000 0.081127000 -1.313484000

|   |              |              |              |
|---|--------------|--------------|--------------|
| 1 | 4.207778000  | 0.622208000  | -2.045640000 |
| 1 | 3.811988000  | 0.448549000  | -0.294709000 |
| 1 | 2.515612000  | 0.355058000  | -1.507398000 |
| 6 | -1.863176000 | -2.395529000 | 4.610087000  |
| 1 | -2.486786000 | -3.285975000 | 4.781447000  |
| 6 | -3.580354000 | 0.082749000  | 1.308977000  |
| 1 | -2.518472000 | 0.358333000  | 1.503743000  |
| 1 | -4.211780000 | 0.624914000  | 2.038838000  |
| 1 | -3.813185000 | 0.447329000  | 0.288950000  |
| 6 | -4.638797000 | 5.839374000  | -1.733661000 |
| 1 | -5.484461000 | 6.456670000  | -2.104550000 |
| 1 | -3.957593000 | 6.524213000  | -1.183407000 |
| 6 | -5.150899000 | -3.954768000 | 3.943948000  |
| 1 | -6.196432000 | -4.251076000 | 3.709129000  |
| 1 | -5.194952000 | -3.228382000 | 4.778895000  |
| 1 | -4.632823000 | -4.867725000 | 4.303055000  |
| 6 | -0.251273000 | -0.123779000 | 4.174305000  |
| 6 | -4.352919000 | -1.976917000 | 2.564918000  |
| 1 | -4.728351000 | -1.306972000 | 3.354612000  |
| 6 | -2.704396000 | 4.366155000  | -2.397051000 |
| 1 | -2.150237000 | 3.890776000  | -3.234071000 |
| 1 | -1.987680000 | 5.010602000  | -1.845193000 |
| 6 | -4.862011000 | 4.265475000  | -3.694386000 |
| 1 | -4.342215000 | 3.807643000  | -4.564064000 |
| 1 | -5.711330000 | 4.854787000  | -4.100579000 |
| 6 | -0.582716000 | 1.097080000  | -3.934431000 |
| 1 | -0.208299000 | 1.645284000  | -3.043579000 |
| 1 | -1.638370000 | 0.839853000  | -3.720225000 |
| 1 | -0.547500000 | 1.787204000  | -4.800014000 |
| 6 | -1.367431000 | -0.067469000 | 5.031047000  |
| 1 | -1.599336000 | 0.883459000  | 5.538927000  |
| 6 | -5.389167000 | 3.165095000  | -2.748460000 |
| 1 | -6.078609000 | 2.491948000  | -3.301003000 |
| 6 | -2.176248000 | -1.193700000 | 5.274423000  |
| 6 | -3.977336000 | 3.910379000  | -0.252594000 |
| 1 | -3.269580000 | 4.551503000  | 0.314444000  |
| 1 | -4.327351000 | 3.111239000  | 0.434548000  |
| 6 | -6.130422000 | 3.810855000  | -1.557925000 |
| 1 | -6.528627000 | 3.023761000  | -0.881142000 |
| 1 | -7.003126000 | 4.391716000  | -1.924857000 |
| 6 | -5.164460000 | 4.737535000  | -0.788505000 |
| 1 | -5.693196000 | 5.200348000  | 0.071420000  |
| 6 | -3.897133000 | 5.191724000  | -2.923076000 |
| 1 | -3.511836000 | 5.981824000  | -3.601662000 |

|   |              |              |              |
|---|--------------|--------------|--------------|
| 6 | 2.703869000  | 4.370029000  | 2.389398000  |
| 1 | 2.150896000  | 3.894801000  | 3.227280000  |
| 1 | 1.986183000  | 5.013699000  | 1.837891000  |
| 6 | 0.586532000  | 1.105765000  | 3.929093000  |
| 1 | 1.638365000  | 0.846089000  | 3.700092000  |
| 1 | 0.564299000  | 1.790027000  | 4.799808000  |
| 1 | 0.203165000  | 1.661708000  | 3.046895000  |
| 6 | -3.367589000 | -1.106590000 | 6.198055000  |
| 1 | -4.273803000 | -0.767411000 | 5.648609000  |
| 1 | -3.198801000 | -0.380970000 | 7.018699000  |
| 1 | -3.607677000 | -2.089775000 | 6.649330000  |
| 6 | 3.896595000  | 5.196701000  | 2.913733000  |
| 1 | 3.511436000  | 5.986926000  | 3.592252000  |
| 6 | 3.974921000  | 3.913814000  | 0.243935000  |
| 1 | 3.266153000  | 4.554108000  | -0.322777000 |
| 1 | 4.324776000  | 3.114501000  | -0.443093000 |
| 6 | 4.862888000  | 4.271559000  | 3.684589000  |
| 1 | 4.344289000  | 3.813890000  | 4.555066000  |
| 1 | 5.712214000  | 4.861708000  | 4.089551000  |
| 6 | 4.636589000  | 5.844154000  | 1.723189000  |
| 1 | 5.482223000  | 6.462254000  | 2.092817000  |
| 1 | 3.954361000  | 6.528212000  | 1.173228000  |
| 6 | 4.203541000  | 2.337942000  | 2.212775000  |
| 1 | 3.654631000  | 1.854384000  | 3.048916000  |
| 1 | 4.556108000  | 1.533677000  | 1.531701000  |
| 6 | 5.162030000  | 4.742109000  | 0.778144000  |
| 1 | 5.689564000  | 5.204766000  | -0.082595000 |
| 6 | 5.389812000  | 3.170971000  | 2.738774000  |
| 1 | 6.080275000  | 2.498612000  | 3.291012000  |
| 6 | 6.129419000  | 3.816527000  | 1.547112000  |
| 1 | 6.527453000  | 3.029309000  | 0.870373000  |
| 1 | 7.002105000  | 4.398187000  | 1.912825000  |

## IX. References

1. Hu, C., Wang, X.-F., Li, J., Chang, X.-Y. & Liu, L. L. A stable rhodium-coordinated carbene with a  $\sigma^0\pi^2$  electronic configuration. *Science* **383**, 81–85 (2024).
2. Sivak, A. & Muetterties, E. L. Metal clusters. 21. Synthesis of rhodium phosphite clusters. *J. Am. Chem. Soc.* **101**, 4878–4887 (1979).
3. Frisch, M. J. et al. Gaussian 16 rev. B.01 (Gaussian, Inc., Wallingford, CT, 2016).
4. Lee, C., Yang, W. & Parr, R. G. Development of the colle-salvetti correlation-energy formula into a functional of the electron density. *Phys. Rev. B* **37**, 785–789 (1988).
5. Stephens, P. J., Devlin, F. J., Chabalowski, C. F. & Frisch, M. J. Ab initio calculation of vibrational absorption and circular dichroism spectra using density functional force fields. *J. Phys. Chem.* **98**, 11623–11627 (1994).
6. Grimme, S., Antony, J., Ehrlich, S. & Krieg, H. A consistent and accurate ab initio parametrization of density functional dispersion correction (DFT-D) for the 94 elements H-Pu. *J. Chem. Phys.* **132**, 154104–154133 (2010).
7. Grimme, S. Semiempirical GGA-type density functional constructed with a long-range dispersion correction. *J. Comput. Chem.* **27**, 1787–1799 (2006).
8. Grimme, S. Accurate description of van der Waals complexes by density functional theory including empirical corrections. *J. Comput. Chem.* **25**, 1463–1473 (2004).
9. Deng, L., Ziegler, T. & Fan, L. A combined density functional and intrinsic reaction coordinate study on the ground state energy surface of H<sub>2</sub>CO. *J. Chem. Phys.* **99**, 3823–3835 (1993).
10. Deng, L. & Ziegler, T. The determination of intrinsic reaction coordinates by density functional theory. *Int. J. Quantum Chem.* **52**, 731–765 (1994).
11. Glendening, E. D., Badenhoop, J. K., Reed, A. E., Carpenter, J. E., Bohmann, J. A., Morales, K. P. C. M., Landis, C. R. & Weinhold, F. NBO 7.0 (Univ. of Wisconsin, Madison, WI, 2018).
12. Neese, F. The ORCA program system. *Wiley Interdiscip. Rev. Comput. Mol. Sci.* **2**, 73–78 (2012).
13. Legault, C. Y. CYLview, 1.0b (Univ. de Sherbrooke, Sherbrooke, Quebec, Canada, 2009); <https://www.cylview.org>.
14. Andrienko, G. A. ChemCraft (2024); <http://www.chemcraftprog.com>.
15. Knizia, G. & Klein, J. E. M. N. Electron flow in reaction mechanisms—revealed from first principles. *Angew. Chem. Int. Ed.* **54**, 5518–5522 (2015).
16. O'Boyle, N. M., Tenderholt, A. L. & Langner, K. M. Cclib: A Library for package-independent computational chemistry algorithms. *J. Comput. Chem.* **29**, 839–845 (2008).
17. Marenich, A.V., Cramer, C.J. & Truhlar, D.G. Universal solvation model based on solute electron density and on a continuum model of the solvent defined by the bulk dielectric constant and atomic surface tensions. *J. Phys. Chem. B* **113**, 6378–6396 (2009).
18. Savin, A., Nesper, R., Wengert, S. & Fässler, T. F. ELF: the electron localization function. *Angew. Chem. Int. Ed. Engl.* **36**, 1808–1832 (1997).
19. van Gisbergen, S., Snijders, J. & Ziegler, T. Chemistry with ADF. *J. Comput. Chem.* **22**, 931–967 (2001).
20. Grimme, S. Exploration of chemical compound, conformer, and reaction space with metadynamics simulations based on tight-binding quantum chemical calculations. *J. Chem. Theory Comput.* **15**, 2847–2862 (2019).

21. Chai, J. D. & Head-Gordon, M. Systematic optimization of long-range corrected hybrid density functionals. *J. Chem. Phys.* **128**, 084106 (2008).
22. Klamt, A. & Schüürmann, G. COSMO: A new approach to dielectric screening in solvents with explicit expressions for the screening energy and its gradient. *J. Chem. Soc., Perkin Trans.* **2**, 799–805 (1993).
23. Andzelm, J., Kölmel, C. & Klamt, A. Incorporation of solvent effects into density functional calculations of molecular energies and geometries. *J. Chem. Phys.* **103**, 9312–9320 (1995).
24. Barone, V. & Cossi, M. Quantum calculation of molecular energies and energy gradients in solution by a conductor solvent model. *J. Phys. Chem. A* **102**, 1995–2001 (1998).
25. Cossi, M., Rega, N., Scalmani, G. & Barone, V. Energies, structures, and electronic properties of molecules in solution with the C-PCM solvation model. *J. Comput. Chem.* **24**, 669–681 (2003).
26. Hanwell, M.D., Curtis, D.E., Lonie, D.C., Vandermeersch, T., Zurek, E. & Hutchison, G.R. Avogadro: an advanced semantic chemical editor, visualization, and analysis platform. *J. Cheminform.* **4**, 17 (2012).
